# Supplementary material for: ‘Awaken’ aryl sulfonyl fluoride: a new partner in the Suzuki–Miyaura coupling reaction
Source: Royal Society of Chemistry journal article supplement (doi:10.1039/d1nj05469d), 2022-01-01
Supplement: d1nj05469d1.pdf [file d1nj05469d1.pdf]

## Supporting Information

### **‘Awaken’ aryl sulfonyl fluoride: a new partner in the Suzuki–Miyaura coupling reaction**

Guofu Zhang, Chenfei Guan, Yiyong Zhao, Huihui Miao, Chengrong Ding\*

*College of Chemical Engineering, Zhejiang University of Technology,*

*Hangzhou, Zhejiang 310014, P. R. China*

Tel.: +86-571-88320147; fax: +86-571-88320147;

E-mail: [dinger@zjut.edu.cn](mailto:dinger@zjut.edu.cn)

### Table of Contents

|                                                                                    |          |
|------------------------------------------------------------------------------------|----------|
| 1. General information.....                                                        | S2       |
| 2. Experimental Procedure for Compounds 1.....                                     | S3       |
| 3. Optimization of reaction conditions.....                                        | S4-S10   |
| 4. Experimental procedures for coupling products.....                              | S11-S12  |
| 5. Mechanistic Studies.....                                                        | S13-S18  |
| 6. Experimental Characterization Data.....                                         | S19-S35  |
| 7. References.....                                                                 | S36-S37  |
| 8. Copies of <sup>1</sup> H and <sup>13</sup> C spectra for coupling products..... | S38-S90  |
| 9. Table of Energies.....                                                          | S91-S92  |
| 10. Cartesian Coordinates.....                                                     | S93-S122 |

## Experimental Section

### 1: General information.

All source materials and reagents were purchased from commercial suppliers and are used without pretreatment unless otherwise indicated. All experiments involving palladium were performed using standard Schlenk techniques under nitrogen or argon unless stated otherwise. were detected using thin-layer chromatography (TLC) on commercial silica gel plates. Visualization of the developed plates was performed under UV light (254 nm). Rapid column chromatography was performed on silica gel. Column chromatography was performed with silica gel (300-400 mesh) using various combinations of non-aqueous organic solvents as eluents. NMR spectra were recorded in CDCl<sub>3</sub> or DMSO-d<sub>6</sub> on Bruker AVANCE III 500 MHz (<sup>1</sup>HNMR) and 126 MHz (<sup>13</sup>CNMR) instruments with TMS as the internal standard. High-resolution mass spectrometry analysis was performed on the ThermoFisher ITQ1100.

## 2: Experimental Procedure for Compounds 1

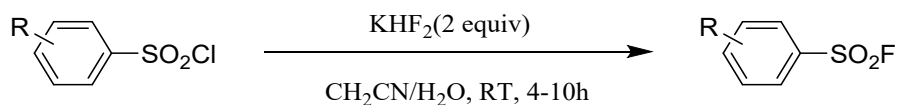

**Representative method for the synthesis of compound 1 (aryl sulfonyl fluoride).<sup>1-3</sup>** KHF<sub>2</sub> (42.5 mmol, 2.5 equiv.) was dissolved in H<sub>2</sub>O (7 mL) to make a saturated solution, which was treated with a solution of aryl sulfonyl chloride (17 mmol, 1 equivalent) in acetonitrile (20 mL). The reaction mixture was stirred at room temperature for 4-10 hours and was measured by HPLC. The aqueous phase was extracted with EtOAc (3 × 10 mL) and the combined organic extracts were washed with 10% NaCl aqueous solution (2x), saturated sodium chloride (1x), dried with sodium sulfate, filtered, and concentrated by rotary evaporation to obtain the crude product, which was purified by column chromatography on silica gel to obtain the pure product. The yield for the formation of aryl sulfonyl fluoride ranges from 45 to 99%.

1. J. Dong, L. Krasnova, M. G. Finn and K. B. Sharpless, *Angew. Chem. Int. Ed.*, 2014, **53**, 9430-9448.
2. H. Mukherjee, J. Debreczeni, J. Breed, S. Tentarelli, B. Aquila, J. E. Dowling, A. Whitty and N. P. Grimster, *Org. Biomol. Chem.*, 2017, **15**, 9685-9695.
3. Y. Liu, D. Yu, Y. Guo, J. C. Xiao, Q. Y. Chen and C. Liu, *Org. Lett.*, 2020, **22**, 2281-2286.

### 3: Optimization of reaction conditions

#### General Procedure for Reaction Optimization.

A Schlenk flask equipped with a stirring bar is filled with Aryl Sulfonyl fluoride (neat, 1.0 equiv.), base (typically, 3.0 equiv.), Organic Boron reagent (typically, 1.5 equiv.), palladium complex (typically, 5 mol%), ligand (typically, 20 mol%) under a positive pressure of nitrogen and five evacuations/backfilling cycles under high vacuum. The solvent (1 mL) was added under vigorous stirring at room temperature, the reaction mixture was placed in a preheated oil bath and stirred for the indicated time. After the indicated time, the reaction mixture was cooled down to room temperature, diluted with ethyl acetate (10 mL), filtered, and concentrated. It was purified by column chromatography on silica gel to obtain the pure product in yield and the samples were analyzed by  $^1\text{H}$  NMR ( $\text{CDCl}_3$ , 500 MHz).

#### Optimization of the reaction conditions for Compounds 3.

**Table S1. Optimization of the reaction conditions: screening of time<sup>a</sup>**

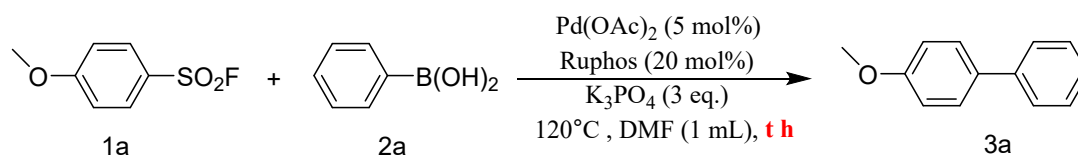

| Entry | Time/h | Yield (%) <sup>b</sup> |
|-------|--------|------------------------|
| 1     | 4      | 47                     |
| 2     | 8      | 55                     |
| 3     | 12     | 64                     |
| 4     | 16     | 63                     |
| 5     | 24     | 59                     |

<sup>a</sup> Reaction conditions: 4-Methoxybenzenesulfonyl fluoride (0.2 mmol), Aryl boronic acids (0.3 mmol, 1.5 equiv.),  $\text{Pd}(\text{OAc})_2$  (0.01 mmol, 5 mol%), Ruphos (0.04 mmol, 20 mol%),  $\text{K}_3\text{PO}_4$  (0.6 mmol, 3.0 equiv.), DMF (1 mL),  $120^\circ\text{C}$ , t h; Under nitrogen atmosphere. <sup>b</sup> Isolated yield.

**Table S2. Optimization of the reaction conditions: screening of base<sup>a</sup>**

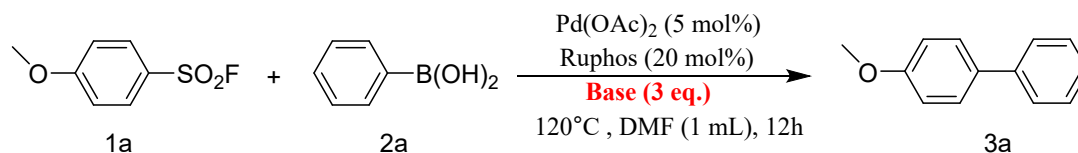

| Entry | Base (3 eq.)             | Yield (%) <sup>b</sup> |
|-------|--------------------------|------------------------|
| 1     | DMAP                     | none                   |
| 2     | $\text{Na}_2\text{CO}_3$ | trace                  |
| 3     | $\text{NaHCO}_3$         | trace                  |

|                 |                                 |       |
|-----------------|---------------------------------|-------|
| 4               | K <sub>2</sub> CO <sub>3</sub>  | 41    |
| 5               | KHCO <sub>3</sub>               | 51    |
| 6               | KF                              | trace |
| 7               | Cs <sub>2</sub> CO <sub>3</sub> | 45    |
| 8               | t-BuOK                          | 11    |
| 9               | KH <sub>2</sub> PO <sub>4</sub> | trace |
| 10              | CH <sub>3</sub> ONa             | trace |
| 11              | DBU                             | none  |
| 12              | DIPEA                           | trace |
| 13              | Et <sub>3</sub> N               | none  |
| 14              | K <sub>3</sub> PO <sub>4</sub>  | 64    |
| 15 <sup>c</sup> | -                               | none  |
| 16 <sup>d</sup> | K <sub>3</sub> PO <sub>4</sub>  | 17    |
| 17 <sup>e</sup> | K <sub>3</sub> PO <sub>4</sub>  | 48    |
| 18 <sup>f</sup> | K <sub>3</sub> PO <sub>4</sub>  | 54    |

<sup>a</sup> Reaction conditions: 4-Methoxybenzenesulfonyl fluoride (0.2 mmol), Aryl boronic acids (0.3 mmol, 1.5 equiv.), Pd(OAc)<sub>2</sub> (0.01 mmol, 5 mol%), Ruphos (0.04 mmol, 20 mol%), Base (0.6 mmol, 3.0 equiv.), DMF (1 mL), 120°C, 12.0 h; Under nitrogen atmosphere. <sup>b</sup> Isolated yield. <sup>c</sup> Base was omitted. <sup>d</sup> Base (0.2 mmol, 1.0 equiv.). <sup>e</sup> Base (0.4 mmol, 2.0 equiv.). <sup>f</sup> Base (0.8 mmol, 4.0 equiv.).

**Table S3. Optimization of the reaction conditions: screening of solvent<sup>a</sup>**

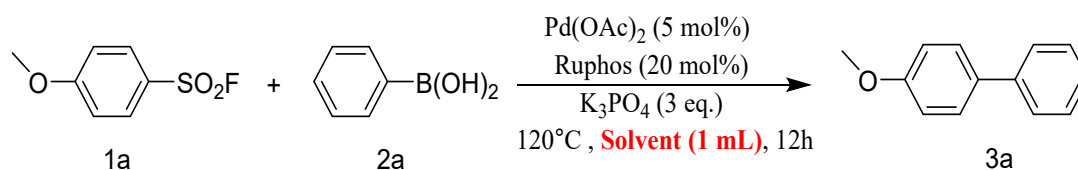

| Entry           | Solvent (1ml)   | Yield (%) <sup>b</sup> |
|-----------------|-----------------|------------------------|
| 1               | DMF             | 64                     |
| 2               | DMSO            | 54                     |
| 3               | DMAC            | 29                     |
| 4               | Toluene         | 62                     |
| 5               | Xylene          | 58                     |
| 6               | O-xylene        | trace                  |
| 7               | Chlorobenzene   | 14                     |
| 8               | Ethylene glycol | trace                  |
| 9               | N-butanol       | 11                     |
| 10              | Glycerol        | trace                  |
| 11              | Dioxane         | 38                     |
| 12 <sup>c</sup> | Water           | none                   |

<sup>a</sup> Reaction conditions: 4-Methoxybenzenesulfonyl fluoride (0.2 mmol), Aryl boronic acids (0.3 mmol, 1.5 equiv.), Pd(OAc)<sub>2</sub> (0.01 mmol, 5 mol%), Ruphos (0.04 mmol, 20 mol%), Base (0.6

mmol, 3.0 equiv.), DMF (1 mL), 120 °C, 12.0 h; Under nitrogen atmosphere. <sup>b</sup> Isolated yield. <sup>c</sup> The reaction was carried out at 80 °C.

**Table S4. Optimization of the reaction conditions: screening of palladium catalyst and ligand<sup>a</sup>**

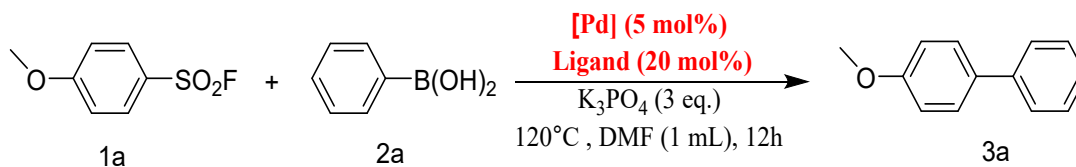

| Entry           | Cat. (mol%)                          | Ligand (mol%)         | Yield (%) <sup>b</sup> |
|-----------------|--------------------------------------|-----------------------|------------------------|
| 1               | Pd(acac) <sub>2</sub>                | Ruphos                | none                   |
| 2               | 5 % Pd/C                             | Ruphos                | none                   |
| 3               | PdCl <sub>2</sub>                    | Ruphos                | none                   |
| 4               | Pd(PPh <sub>3</sub> )Cl <sub>2</sub> | Ruphos                | none                   |
| 5               | Pd(TFA) <sub>2</sub>                 | Ruphos                | 57                     |
| 6               | Pd(OAc) <sub>2</sub>                 | Ruphos                | 64                     |
| 7               | Pd(OAc) <sub>2</sub>                 | PPh <sub>3</sub>      | none                   |
| 8               | Pd(OAc) <sub>2</sub>                 | DPPP                  | none                   |
| 9               | Pd(OAc) <sub>2</sub>                 | Xantphos              | none                   |
| 10              | Pd(OAc) <sub>2</sub>                 | TMTF                  | none                   |
| 11              | Pd(OAc) <sub>2</sub>                 | (R)-BINAP             | none                   |
| 12              | Pd(OAc) <sub>2</sub>                 | SPhos                 | 56                     |
| 13              | Pd(OAc) <sub>2</sub>                 | BINAP                 | none                   |
| 14              | Pd(OAc) <sub>2</sub>                 | DCPP                  | none                   |
| 15              | Pd(OAc) <sub>2</sub>                 | DPEphos               | none                   |
| 16              | Pd(OAc) <sub>2</sub>                 | TDMPP                 | 38                     |
| 17              | Pd(OAc) <sub>2</sub>                 | NHC-Pd                | none                   |
| 18              | Pd(OAc) <sub>2</sub>                 | N-XantPhos            | none                   |
| 19              | Pd(OAc) <sub>2</sub>                 | P(1-nap) <sub>3</sub> | 14                     |
| 20              | Pd(OAc) <sub>2</sub>                 | JohnPhos              | none                   |
| 21              | Pd(OAc) <sub>2</sub>                 | BrettPhos             | 52                     |
| 22              | Pd(OAc) <sub>2</sub>                 | Dppf                  | none                   |
| 23              | Pd(OAc) <sub>2</sub>                 | Cphos                 | none                   |
| 24              | Pd(OAc) <sub>2</sub>                 | PhDavephos            | none                   |
| 25 <sup>c</sup> | -                                    | Ruphos                | none                   |
| 26 <sup>d</sup> | Pd(OAc) <sub>2</sub>                 | -                     | none                   |
| 27 <sup>e</sup> | Pd(OAc) <sub>2</sub>                 | Ruphos                | 41                     |
| 28 <sup>f</sup> | Pd(OAc) <sub>2</sub>                 | Ruphos                | 74                     |
| 29 <sup>g</sup> | Pd(OAc) <sub>2</sub>                 | Ruphos                | 74                     |
| 30 <sup>h</sup> | Pd(OAc) <sub>2</sub>                 | Ruphos                | 39                     |
| 31 <sup>i</sup> | Pd(OAc) <sub>2</sub>                 | Ruphos                | 15                     |

<sup>a</sup> Reaction conditions: 4-Methoxybenzenesulfonyl fluoride (0.2 mmol), Aryl boronic acids (0.3 mmol, 1.5 equiv.), [Pd] (0.01 mmol, 5 mol%), Ligand (0.04 mmol, 20 mol%), Base (0.6 mmol, 3.0 equiv.), DMF (1 mL), 120 °C, 12.0 h; Under nitrogen atmosphere. <sup>b</sup> Isolated yield. <sup>c</sup> No Catalyst was used. <sup>d</sup> No Ligand was used. <sup>e</sup> Pd(OAc)<sub>2</sub> (0.004 mmol, 2 mol%). <sup>f</sup> Pd(OAc)<sub>2</sub> (0.02 mmol, 10 mol%). <sup>g</sup> Pd(OAc)<sub>2</sub> (0.04 mmol, 20 mol%). <sup>h</sup> Ruphos (0.02 mmol, 10 mol%). <sup>i</sup> Ruphos (0.08 mmol, 40 mol%).

### Phosphine ligands:

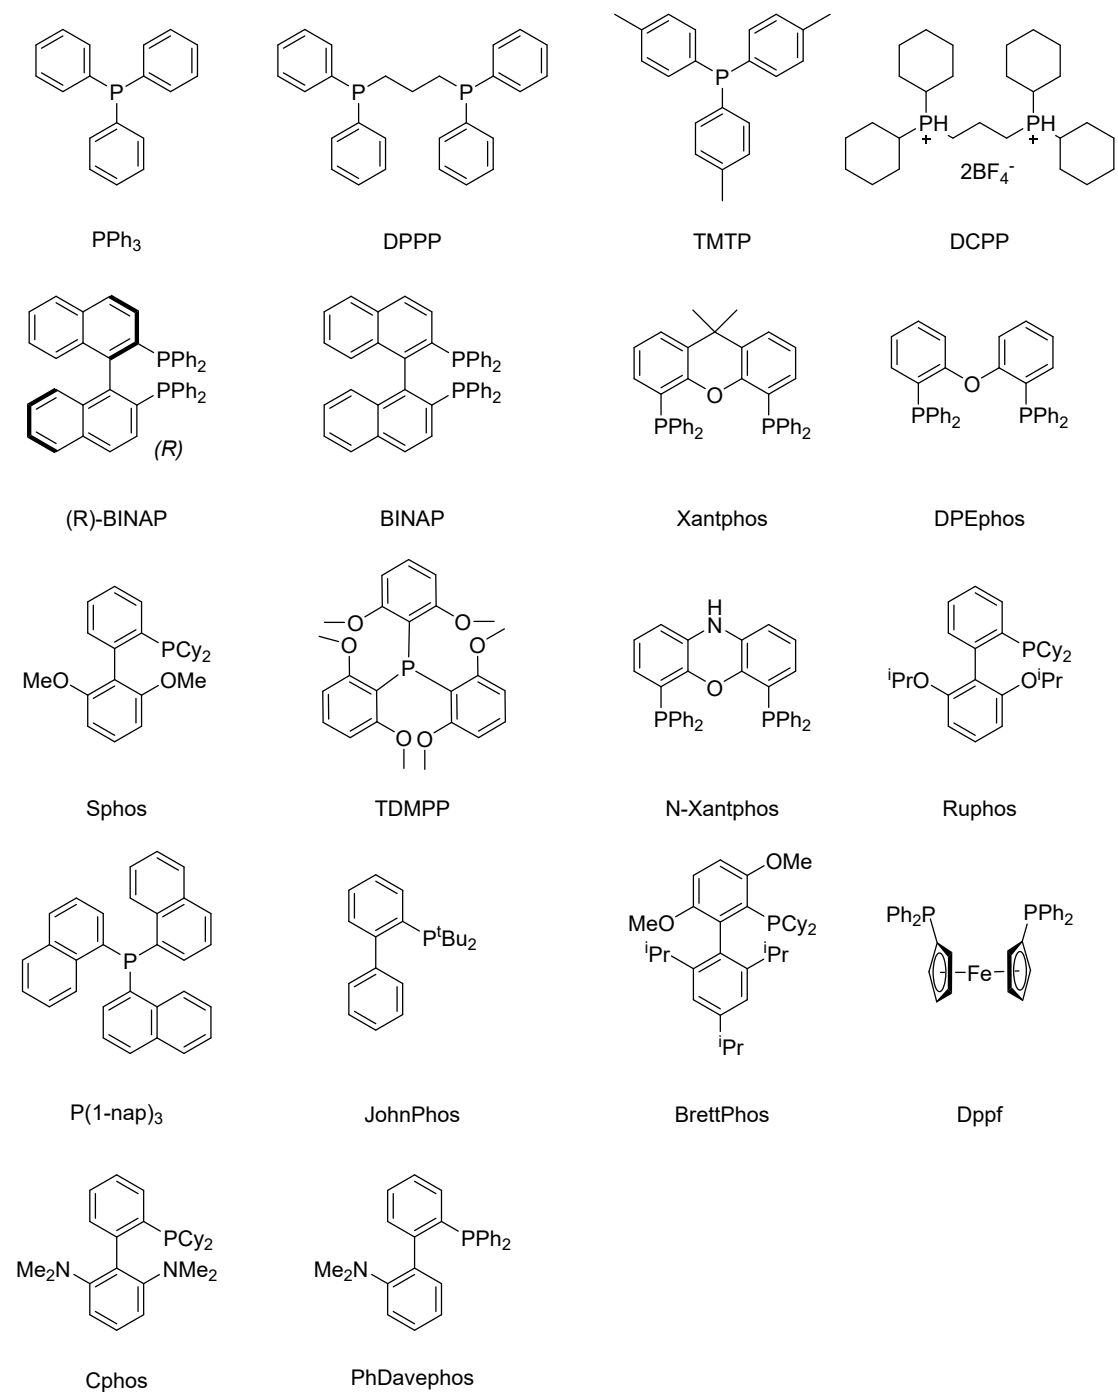

**Table S5. Optimization of the reaction conditions: screening of temp<sup>a</sup>**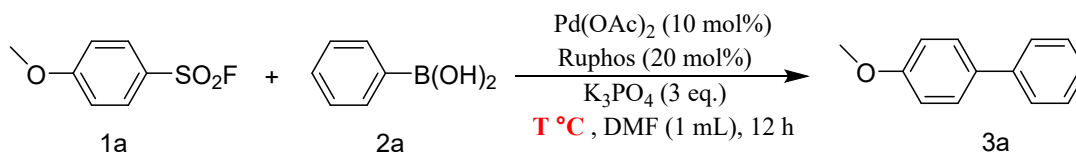

| Entry | Temp (°C) | Yield (%) <sup>b</sup> |
|-------|-----------|------------------------|
| 1     | 100       | 45                     |
| 2     | 120       | 74                     |
| 3     | 140       | 37                     |

<sup>a</sup> Reaction conditions: 4-Methoxybenzenesulfonyl fluoride (0.2 mmol), Aryl boronic acids (0.3 mmol, 1.5 equiv.), Pd(OAc)<sub>2</sub> (0.02 mmol, 10 mol%), Ruphos (0.04 mmol, 20 mol%), K<sub>3</sub>PO<sub>4</sub> (0.6 mmol, 3.0 equiv.), DMF (1 mL), 12.0 h; Under nitrogen atmosphere. <sup>b</sup> Isolated yield.

**Table S6. Optimization of the reaction conditions: screening of the ratio of boronic acid<sup>a</sup>**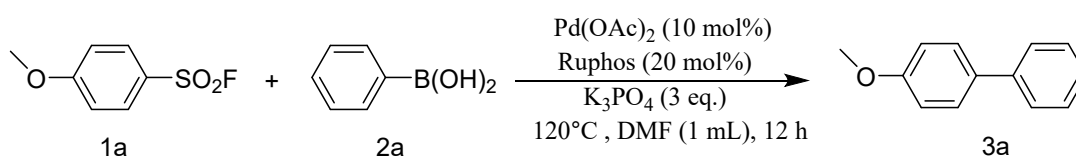

| Entry          | 2a (equiv) | Yield (%) <sup>b</sup> |
|----------------|------------|------------------------|
| 1              | 1          | 47                     |
| 2              | 1.5        | 74                     |
| 3              | 2          | 50                     |
| 4              | 4          | 50                     |
| 5 <sup>c</sup> | -          | none                   |

<sup>a</sup> Reaction conditions: 4-Methoxybenzenesulfonyl fluoride (0.2 mmol), Aryl boronic acids, Pd(OAc)<sub>2</sub> (0.02 mmol, 10 mol%), Ruphos (0.04 mmol, 20 mol%), K<sub>3</sub>PO<sub>4</sub> (0.6 mmol, 3.0 equiv.), DMF (1 mL), 120 °C, 12.0 h; Under nitrogen atmosphere. <sup>b</sup> Isolated yield. <sup>c</sup> No Aryl boronic acids was used.

**Table S7. Optimization of the reaction conditions: screening of atmosphere<sup>a</sup>**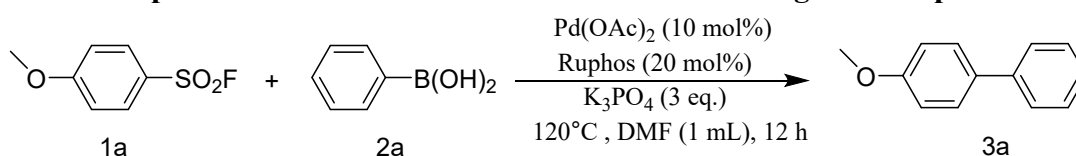



| Entry | Atmosphere                     | Yield (%) |
|-------|--------------------------------|-----------|
| 1     | Air                            | 12        |
| 2     | N <sub>2</sub>                 | 74        |
| 3     | O <sub>2</sub>                 | none      |
| 4     | SO <sub>2</sub> F <sub>2</sub> | none      |

<sup>a</sup> Reaction conditions: 4-Methoxybenzenesulfonyl fluoride (0.2 mmol), Aryl boronic acids (0.3 mmol, 1.5 equiv.), Pd(OAc)<sub>2</sub> (0.02 mmol, 10 mol%), Ruphos (0.04 mmol, 20 mol%), K<sub>3</sub>PO<sub>4</sub> (0.6 mmol, 3.0 equiv.), DMF (1ml), 120 °C, 12.0 h. <sup>b</sup> Isolated yield.

### Optimization of the reaction conditions for Compounds 4.

**Table S8. Optimization of the reaction conditions.<sup>a</sup>**

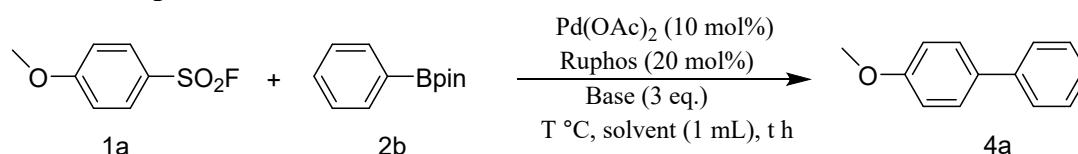

| Entry           | Base (3eq.)                    | Solvent | Temp (°C) | Time (h) | Yield (%) <sup>b</sup> |
|-----------------|--------------------------------|---------|-----------|----------|------------------------|
| 1               | K <sub>2</sub> CO <sub>3</sub> | DMF     | 120       | 12       | 12                     |
| 2               | KHCO <sub>3</sub>              | DMF     | 120       | 12       | trace                  |
| 3               | t-BuOK                         | DMF     | 120       | 12       | none                   |
| 4               | Et <sub>3</sub> N              | DMF     | 120       | 12       | 11                     |
| 5               | Me <sub>3</sub> SiOK           | DMF     | 120       | 12       | none                   |
| 6               | K <sub>3</sub> PO <sub>4</sub> | DMF     | 120       | 12       | 75                     |
| 7               | K <sub>3</sub> PO <sub>4</sub> | DMSO    | 120       | 12       | 58                     |
| 8               | K <sub>3</sub> PO <sub>4</sub> | Toluene | 120       | 12       | 67                     |
| 9               | K <sub>3</sub> PO <sub>4</sub> | Dioxane | 120       | 12       | 46                     |
| 10              | K <sub>3</sub> PO <sub>4</sub> | DMF     | 60        | 12       | 62                     |
| 11              | K <sub>3</sub> PO <sub>4</sub> | DMF     | 80        | 12       | 77                     |
| 12              | K <sub>3</sub> PO <sub>4</sub> | DMF     | 100       | 12       | 74                     |
| 13              | K <sub>3</sub> PO <sub>4</sub> | DMF     | 140       | 12       | 57                     |
| 14              | K <sub>3</sub> PO <sub>4</sub> | DMF     | 80        | 4        | 35                     |
| 15              | K <sub>3</sub> PO <sub>4</sub> | DMF     | 80        | 8        | 77                     |
| 16              | K <sub>3</sub> PO <sub>4</sub> | DMF     | 80        | 10       | 77                     |
| 17              | K <sub>3</sub> PO <sub>4</sub> | DMF     | 80        | 14       | 76                     |
| 18 <sup>c</sup> | K <sub>3</sub> PO <sub>4</sub> | DMF     | 80        | 8        | 61                     |
| 19 <sup>d</sup> | K <sub>3</sub> PO <sub>4</sub> | DMF     | 80        | 8        | 80                     |

<sup>a</sup> Reaction conditions: 4-Methoxybenzenesulfonyl fluoride (0.2 mmol), Arylboronic acid ester (0.3 mmol, 1.5 equiv.), Pd(OAc)<sub>2</sub> (0.02 mmol, 10 mol%), Ruphos (0.04 mmol, 20 mol%), K<sub>3</sub>PO<sub>4</sub> (0.6 mmol, 3.0 equiv.), DMF (1 mL), 80 °C, 8.0 h; Under nitrogen atmosphere. <sup>b</sup> Isolated yield. <sup>c</sup> Arylboronic acid ester (0.2mmol, 1.0 equiv.). <sup>d</sup> Arylboronic acid ester (0.4mmol, 2.0 equiv.).

### Optimization of the reaction conditions for Compounds 5.

**Table S9. Optimization of the reaction conditions.<sup>a</sup>**

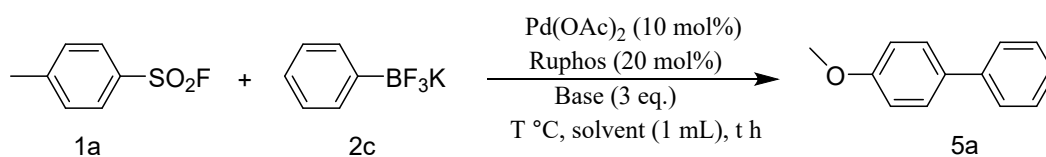

| Entry           | Base (3eq.)                    | Solvent | Temp (°C) | Time (h) | Yield (%) <sup>b</sup> |
|-----------------|--------------------------------|---------|-----------|----------|------------------------|
| 1               | K <sub>3</sub> PO <sub>4</sub> | DMF     | 80        | 12       | 20                     |
| 2               | K <sub>3</sub> PO <sub>4</sub> | DMF     | 100       | 12       | 32                     |
| 3               | K <sub>3</sub> PO <sub>4</sub> | DMF     | 120       | 12       | 19                     |
| 4               | K <sub>3</sub> PO <sub>4</sub> | DMF     | 140       | 12       | 17                     |
| 5               | K <sub>3</sub> PO <sub>4</sub> | DMF     | 100       | 6        | 13                     |
| 6               | K <sub>3</sub> PO <sub>4</sub> | DMF     | 100       | 8        | 46                     |
| 7               | K <sub>3</sub> PO <sub>4</sub> | DMF     | 100       | 16       | 32                     |
| 8               | K <sub>3</sub> PO <sub>4</sub> | DMF     | 100       | 24       | 31                     |
| 9               | K <sub>2</sub> CO <sub>3</sub> | DMF     | 100       | 8        | 29                     |
| 10              | KHCO <sub>3</sub>              | DMF     | 100       | 8        | 16                     |
| 11              | t-BuOK                         | DMF     | 100       | 8        | none                   |
| 12              | Et <sub>3</sub> N              | DMF     | 100       | 8        | 11                     |
| 13              | Me <sub>3</sub> SiOK           | DMF     | 100       | 8        | none                   |
| 14              | K <sub>3</sub> PO <sub>4</sub> | DMSO    | 100       | 8        | trace                  |
| 15              | K <sub>3</sub> PO <sub>4</sub> | Toluene | 100       | 8        | trace                  |
| 16              | K <sub>3</sub> PO <sub>4</sub> | Dioxane | 100       | 8        | 27                     |
| 17 <sup>c</sup> | K <sub>3</sub> PO <sub>4</sub> | DMF     | 100       | 8        | 11                     |
| 18 <sup>d</sup> | K <sub>3</sub> PO <sub>4</sub> | DMF     | 100       | 8        | 35                     |

<sup>a</sup> Reaction conditions: 4-Methoxybenzenesulfonyl fluoride (0.2 mmol), Potassium phenyl trifluoroborate (0.3 mmol, 1.5 equiv.), Pd(OAc)<sub>2</sub> (0.02 mmol, 10 mol%), Ruphos (0.04 mmol, 20 mol%), K<sub>3</sub>PO<sub>4</sub> (0.6 mmol, 3.0 equiv.), DMF (1 mL), 80°C, 8.0 h; Under nitrogen atmosphere. <sup>b</sup> Isolated yield. <sup>c</sup> Potassium phenyltrifluoroborate (0.2mmol, 1.0 equiv.). <sup>d</sup> Potassium phenyl trifluoroborate (0.4mmol, 2.0 equiv.)

#### 4: Experimental Procedure for coupling products

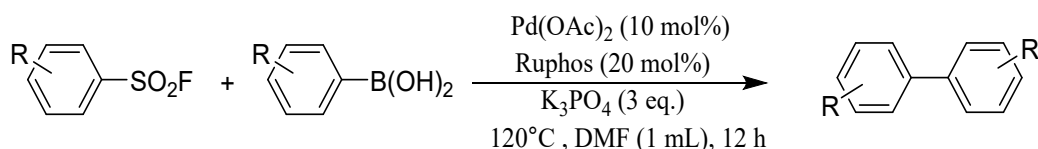

##### General procedure for Suzuki-Miyamura cross-coupling of aryl sulfonyl fluoride with aryl boronic acid.

Aryl sulfonyl fluoride (0.2 mmol, 1.0 equiv.), Aryl boronic acid (0.3 mmol, 1.5 equiv.), Pd(OAc)<sub>2</sub> (4.4 mg, 10 mol%), Ruphos (18.7mg, 20 mol%) and K<sub>3</sub>PO<sub>4</sub> (0.6 mmol, 3.0 equiv.) were added to 10 mL Schlenk Flasks equipped with stirring bar. under a positive pressure of nitrogen and five evacuation/backfilling cycles under high vacuum. The DMF (1 mL) was added under vigorous stirring at room temperature, the reaction mixture was placed in a preheated oil bath (120°C) and stirred for 12 hours. After 12 hours, the reaction mixture was cooled down to room temperature, diluted with ethyl acetate (10 mL), filtered, and concentrated. Column chromatographic purification on silica gel (ethyl acetate/petroleum ether) to obtain pure product.

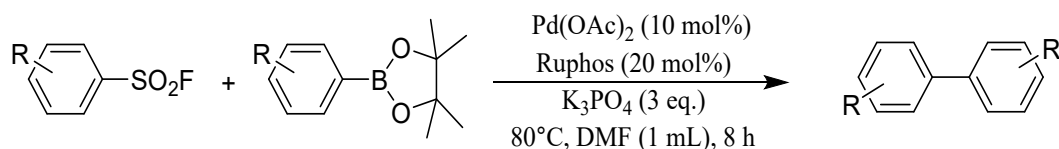

##### General procedure for Suzuki-Miyamura cross-coupling of aryl sulfonyl fluoride with aryl boronic acid ester.

Aryl sulfonyl fluoride (0.2 mmol, 1.0 equiv.), Aryl boronic acid ester (0.4 mmol, 2.0 equiv.), Pd(OAc)<sub>2</sub> (4.4 mg, 10 mol%), Ruphos (18.7mg, 20 mol%) and K<sub>3</sub>PO<sub>4</sub> (0.6 mmol, 3.0 equiv.) were added to 10 mL Schlenk Flasks equipped with stirring bar. under a positive pressure of nitrogen and five evacuation/backfilling cycles under high vacuum. The DMF (1 mL) was added under vigorous stirring at room temperature, the reaction mixture was placed in a preheated oil bath (80°C) and stirred for 8 hours. After 8 hours, the reaction mixture was cooled down to room temperature, diluted with ethyl acetate (10 mL), filtered, and concentrated. Column chromatographic purification on silica gel (ethyl acetate/petroleum ether) to obtain pure product.

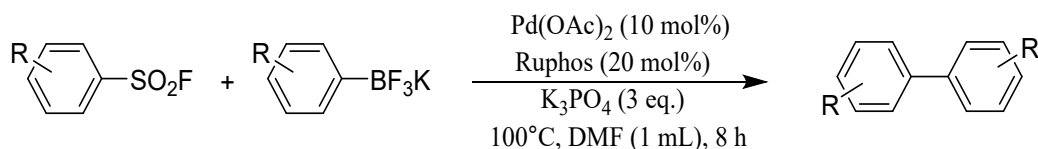

**General procedure for Suzuki-Miyamura cross-coupling of aryl sulfonyl fluoride with potassium phenyl trifluoroborate.**

Aryl sulfonyl fluoride (0.2 mmol, 1.0 equiv.), Potassium phenyl trifluoroborate (0.4 mmol, 2.0 equiv.), Pd(OAc)<sub>2</sub> (4.4 mg, 10 mol%), Ruphos (18.7mg, 20 mol%) and K<sub>3</sub>PO<sub>4</sub> (0.6 mmol, 3.0 equiv.) were added to 10 mL Schlenk Flasks equipped with stirring bar. under a positive pressure of nitrogen and five evacuation/backfilling cycles under high vacuum. The DMF (1 mL) was added under vigorous stirring at room temperature, the reaction mixture was placed in a preheated oil bath (100°C) and stirred for 8 hours. After 8 hours, the reaction mixture was cooled down to room temperature, diluted with ethyl acetate (10 mL), filtered, and concentrated. Column chromatographic purification on silica gel (ethyl acetate/petroleum ether) to obtain pure product.

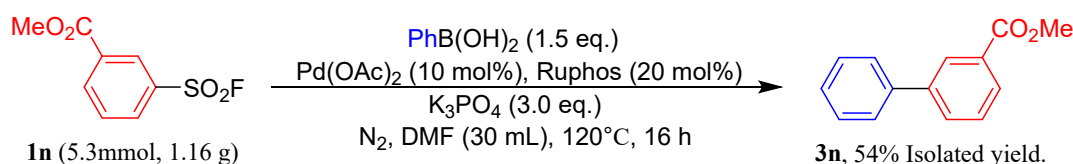

**General procedure for the gram-scale preparation.**

methyl 3-(fluorosulfonyl)benzoate (5.3 mmol, 1.16g, 1.0 equiv.), Aryl boronic acid (8.0 mmol, 1.5 equiv.), Pd(OAc)<sub>2</sub> (130.0 mg, 10 mol%), Ruphos (494.6 mg, 20 mol%) and K<sub>3</sub>PO<sub>4</sub> (15.9 mmol, 3.0 equiv.) were added to 100 mL Schlenk Flasks equipped with stirring bar. under a positive pressure of nitrogen and five evacuation/backfilling cycles under high vacuum. The DMF (30 mL) was added under vigorous stirring at room temperature, the reaction mixture was placed in a preheated oil bath (120°C) and stirred for 16 hours. After 16 hours, the reaction mixture was cooled down to room temperature, diluted with ethyl acetate, filtered, and concentrated. Column

chromatographic purification on silica gel (ethyl acetate/petroleum ether) to obtain pure product. Yield: 54% (607.4 mg).

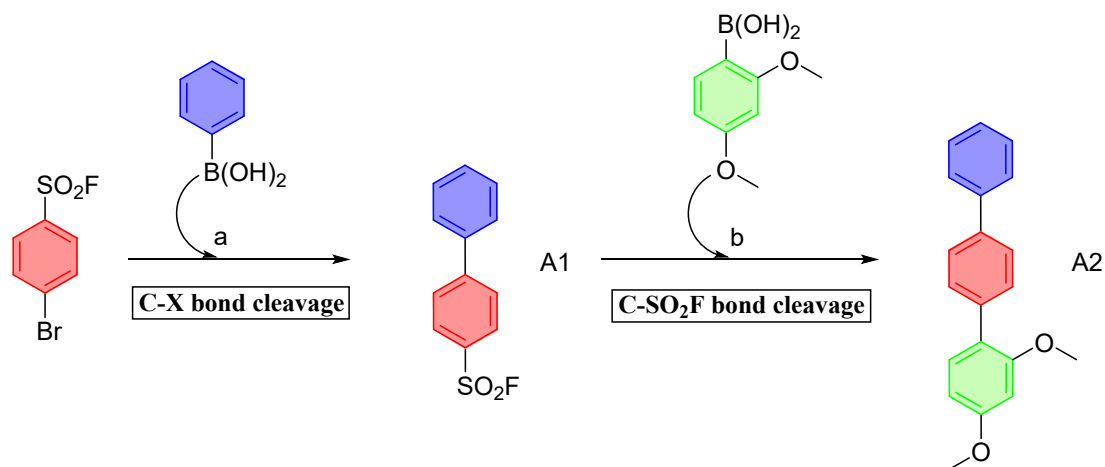

### Sequential synthesis of non-symmetric terphenyls.

4-Br-sulfonyl fluoride (49 mg, 0.2 mmol, 1.0 equiv.), aryl/alkenyl boronic acid (0.3 mmol, 1.5 equiv.), Pd(OAc)<sub>2</sub> (0.5 mg, 1 mol%), triethylamine (88  $\mu$ L, 0.6 mmol, 3.0 equiv.), and water (2.5 mL) were added to a 10 mL Schlenk Flasks equipped with magnetic stir bar. The resulting reaction mixture was stirred at room temperature in the open air. The reaction progress was monitored using TLC. Upon completion, the reaction mixture was diluted with ethylacetate (20 mL) and washed with water (3  $\times$  15mL), followed by brine solution (3  $\times$  15 mL). The organic layer was dried over anhydrous MgSO<sub>4</sub> and concentrated under vacuum. Column chromatographic purification on silica gel (EtOAc/hexanes = 1:50) to obtain pure product **A1**.

The **A1** (0.2 mmol, 1.0 equiv.), (3,4-dimethoxyphenyl)boronic acid (0.3 mmol, 1.5 equiv.), Pd(OAc)<sub>2</sub> (6.7 mg, 15 mol%), Ruphos (18.7mg, 20 mol%) and K<sub>3</sub>PO<sub>4</sub> (0.6 mmol, 3.0 equiv.) were added in nitrogen. Under a positive pressure of nitrogen and five evacuation/backfilling cycles under high vacuum. The reaction mixture was placed in a preheated oil bath (120°C) and stirred for 12 hours. After 12 hours, the reaction mixture was cooled down to room temperature, diluted with ethyl acetate (10 mL), filtered, and concentrated. Column chromatographic purification on silica gel (EtOAc/hexanes = 1:20) to obtain pure product **A2**. Yield: 73% (42 mg).

## 5: Mechanistic Studies

### Method

All calculations were carried out with the Gaussian 09 software<sup>1</sup>. The PBE0 functional<sup>2</sup> was adopted for all calculations in combination with the D3BJ dispersion correction<sup>3</sup>. For geometry optimization and frequency calculations, the LanL2DZ ECP and basis set<sup>4</sup> was used for Pd and 6-31G(d) for others<sup>5,6</sup>. The thermal correction to Gibbs free energy was calculated by the Shermo program<sup>7</sup>, based on the vibrational analysis result, and the temperature was set as 393 K. The singlet point energy calculations were performed with a larger basis set combination, in which the def2-TZVP basis set<sup>8</sup> was used for Pd, and 6-311+G(d,p)<sup>9,10</sup> for others. The SMD implicit solvation model<sup>11</sup> was used to account for the solvation effect of DMF when performing single point energy calculations.

### References:

1. Frisch, M.; Trucks, G. W.; Schlegel, H. B.; Scuseria, G. E.; Robb, M. A.; Cheeseman, J. R.; Scalmani, G.; Barone, V.; Mennucci, B.; Petersson, G.; Others, Gaussian 09, revision D. 01. In Gaussian, Inc., Wallingford CT: 2009.
2. Adamo C., Barone V. Toward reliable density functional methods without adjustable parameters: The PBE0 model. *J. Chem. Phys.*, 1999, **110**, 6158-6170.
3. Grimme S., Antony J., Ehrlich S., Krieg H., A consistent and accurate ab initio parametrization of density functional dispersion correction (DFT-D) for the 94 elements H-Pu. *J. Chem. Phys.*, 2010, **132**, 154104.
4. P. J. Hay and W. R. Wadt, *J. Chem. Phys.*, **82**, 299-310 (1985).
5. *Theor. Chim. Acta*, **28**, 213-222 (1973).
6. W. J. Hehre, R. Ditchfield, and J. A. Pople, *J. Chem. Phys.*, **56**, 2257-2261 (1972).
7. Tian Lu, Qinxue Chen, Shermo: A general code for calculating molecular thermodynamic properties, ChemRxiv (2020) DOI: 10.26434/chemrxiv.12278801.
8. Weigend F.; Ahlrichs, R., Balanced basis sets of split valence, triple zeta valence and quadruple zeta valence quality for H to Rn: Design and assessment of accuracy. *Phys. Chem. Chem. Phys.* 2005, **7**, 3297 .
9. *J. Comput. Chem.*, **4**, 294-301 (1983).
10. *J. Chem. Phys.*, **72**, 650-654 (1980).
11. Marenich, A. V.; Cramer, C. J.; Truhlar, D. G., Universal solvation model based on solute electron density and on a continuum model of the solvent defined by the bulk dielectric constant and atomic surface tensions. *The Journal of Physical Chemistry B*, 2009, **113**, (18), 6378.

Possible pathways of (A) and (B) catalytic cycle.

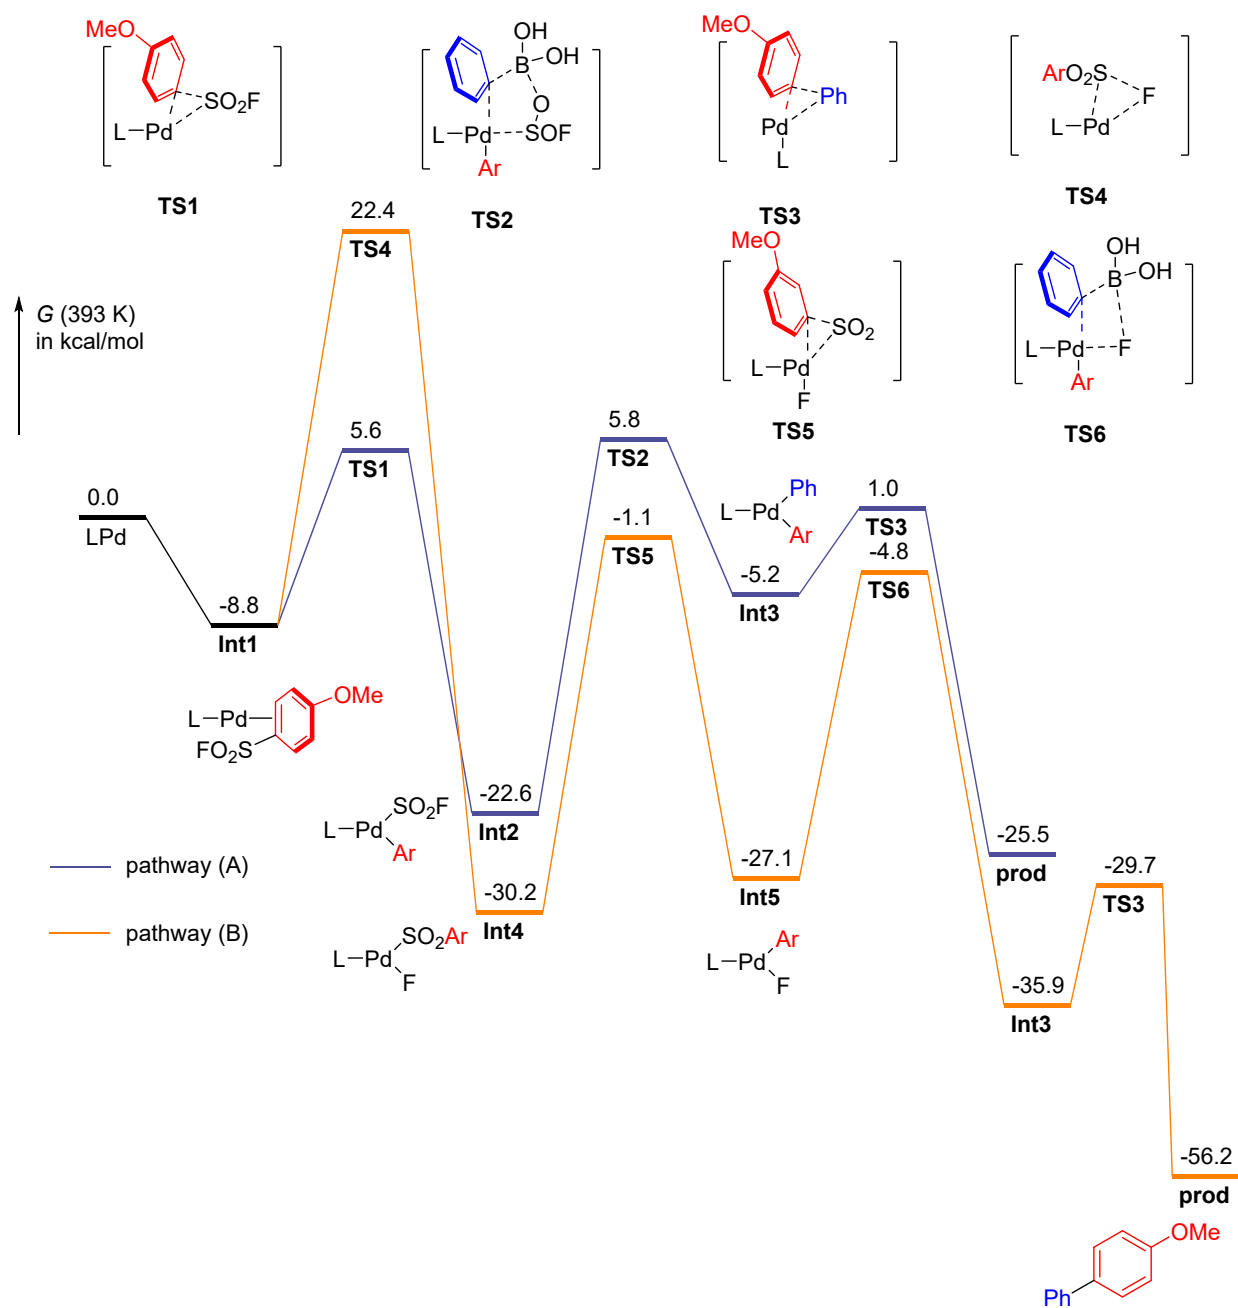

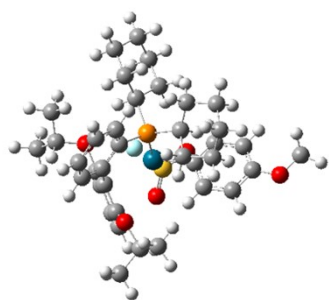

Int2

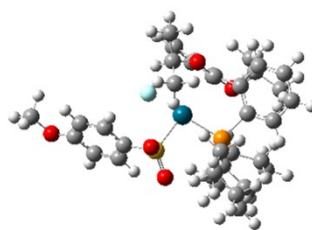

Int4

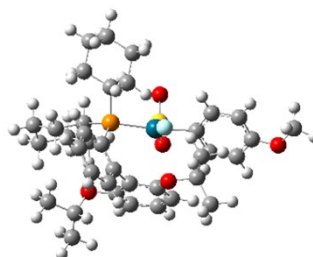

Ts5

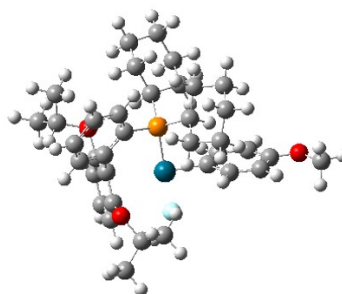

Int5

Oxidative addition:

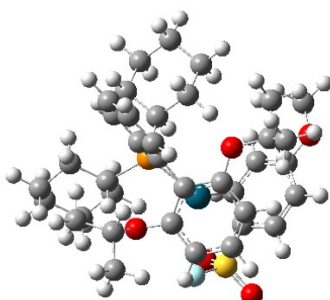

Int1

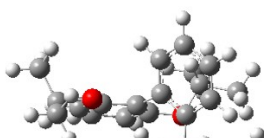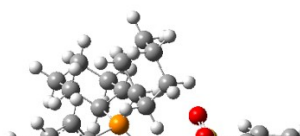



Transmetalation:

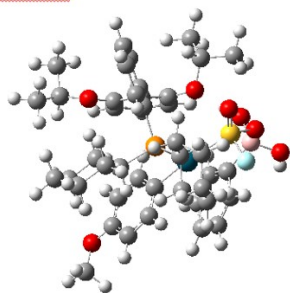

Ts2

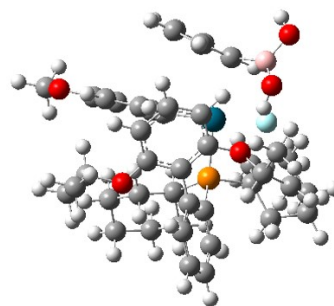

Ts6

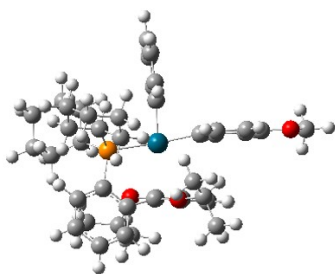

Int3

Reductive elimination:

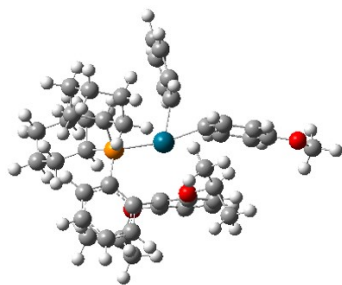

Ts3

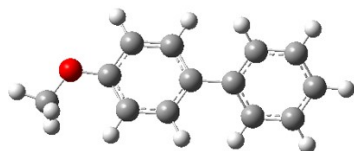

Prod.

## 6: Experimental Characterization Data

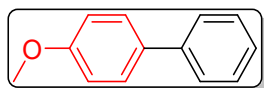

### 4-Methoxybiphenyl (**3a**)

White solid, 78% yield, <sup>1</sup>H NMR (500 MHz, CDCl<sub>3</sub>) δ 7.57 (dd, *J* = 10.6, 8.1 Hz, 4H), 7.44 (t, *J* = 7.7 Hz, 2H), 7.33 (t, *J* = 7.4 Hz, 1H), 7.00 (d, *J* = 8.7 Hz, 2H), 3.88 (s, 3H). <sup>13</sup>C NMR (126 MHz, CDCl<sub>3</sub>) δ 159.16, 140.84, 133.79, 128.74, 128.17, 126.75, 126.67, 114.22, 55.36. HRMS (EI-TOF) calcd for C<sub>13</sub>H<sub>12</sub>O: 184.0888; Found: 184.0896. NMR spectroscopic data agreed with literature values.<sup>1</sup>

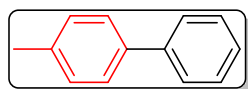

### 4-Methylbiphenyl (**3b**)

White solid, 78% yield, <sup>1</sup>H NMR (500 MHz, CDCl<sub>3</sub>) δ 7.65 (d, *J* = 7.6 Hz, 2H), 7.57 (d, *J* = 8.0 Hz, 2H), 7.49 (t, *J* = 7.6 Hz, 2H), 7.39 (t, *J* = 7.3 Hz, 1H), 7.32 (d, *J* = 8.0 Hz, 2H), 2.46 (s, 3H). <sup>13</sup>C NMR (126 MHz, CDCl<sub>3</sub>) δ 141.19, 138.39, 137.01, 129.48, 128.71, 127.00, 126.98, 21.09. HRMS (EI-TOF) calcd for C<sub>13</sub>H<sub>12</sub>: 168.0939; Found: 168.0940. NMR spectroscopic data agreed with literature values.<sup>1</sup>

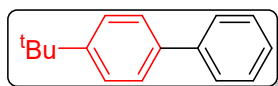

### 4-tert-Butylbiphenyl (**3c**)

White solid, 93% yield, <sup>1</sup>H NMR (500 MHz, CDCl<sub>3</sub>) δ 7.64 – 7.60 (m, 2H), 7.59 – 7.54 (m, 2H), 7.52 – 7.48 (m, 2H), 7.45 (t, *J* = 7.7 Hz, 2H), 7.37 – 7.32 (m, 1H), 1.39 (s, 9H). <sup>13</sup>C NMR (126 MHz, CDCl<sub>3</sub>) δ 150.29, 141.11, 138.35, 128.71, 127.04,

126.99 , 126.81 , 125.73 , 34.55 , 31.40 . **HRMS** (EI-TOF) calcd for C<sub>16</sub>H<sub>18</sub>: 210.1409; Found: 210.1419. NMR spectroscopic data agreed with literature values.<sup>2</sup>

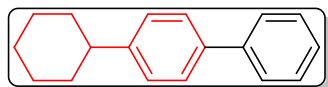

4-cyclohexyl-1,1'-biphenyl (**3d**)

White solid, 91% yield, **<sup>1</sup>H NMR** (500 MHz, CDCl<sub>3</sub>) δ 7.60 (d, J = 7.7 Hz, 2H), 7.54 (d, J = 8.2 Hz, 2H), 7.44 (dd, J = 15.3 Hz, 2H), 7.34 (dd, J = 7.4 Hz, 1H), 7.30 (d, J = 8.2 Hz, 2H), 2.60 – 2.53 (m, 1H), 1.97 – 1.85 (m, 4H), 1.82 – 1.76 (m, 1H), 1.51 – 1.38 (m, 5H). **<sup>13</sup>C NMR** (126 MHz, ) δ 147.23 , 141.20 , 138.73 , 128.66 , 127.00 , 126.91 , 44.25 , 34.47 , 26.92 , 26.18 . **HRMS** (EI-TOF) calcd for C<sub>18</sub>H<sub>20</sub>: 236.1565; Found: 236.1563. NMR spectroscopic data agreed with literature values.<sup>3</sup>

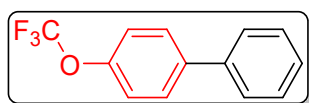

4-(trifluoromethoxy)-1,1'-biphenyl (**3e**)

White solid, 82% yield, **<sup>1</sup>H NMR** (500 MHz, CDCl<sub>3</sub>) δ 7.65 – 7.56 (m, 4H), 7.47 (t, J = 7.6 Hz, 2H), 7.42 – 7.36 (m, 1H), 7.31 (d, J = 8.1 Hz, 2H). **<sup>13</sup>C NMR** (126 MHz, CDCl<sub>3</sub>) δ 148.71 (q, 1.7 Hz), 140.02 , 139.89 , 128.91 , 128.48 , 127.68 , 127.13 , 121.23 , 120.58 (q, 257.0 Hz). **<sup>19</sup>F NMR** (565 MHz, CDCl<sub>3</sub>) δ -62.51 . **HRMS** (EI-TOF) calcd for C<sub>13</sub>H<sub>9</sub>F<sub>3</sub>O: 238.0605; Found: 238.0601. NMR spectroscopic data agreed with literature values.<sup>2</sup>

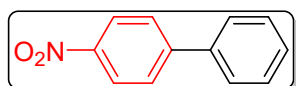

4-nitro-1,1'-biphenyl (**3f**)

Yellow solid, 26% yield, **<sup>1</sup>H NMR** (500 MHz, CDCl<sub>3</sub>) δ 8.32 (d, J = 8.9 Hz, 2H), 7.76 (d, J = 8.8 Hz, 2H), 7.64 (d, J = 7.3 Hz, 2H), 7.55 – 7.44 (m, 3H). **<sup>13</sup>C NMR** (126 MHz,

CDCl<sub>3</sub>)  $\delta$  147.65 , 138.80 , 129.16 , 128.91 , 127.81 , 127.39 , 124.10 . **HRMS** (EI-TOF) calcd for C<sub>12</sub>H<sub>9</sub>NO<sub>2</sub>: 199.0633; Found: 199.0641. NMR spectroscopic data agreed with literature values.<sup>4</sup>

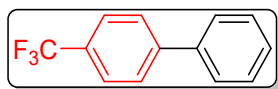

4-(trifluoromethyl)-1,1'-biphenyl (**3g**)

White solid, 92% yield, **<sup>1</sup>H NMR** (500 MHz, CDCl<sub>3</sub>)  $\delta$  7.72 (s, 4H), 7.64 – 7.61 (m, 2H), 7.53 – 7.48 (m, 2H), 7.46 – 7.41 (m, 1H). **<sup>13</sup>C NMR** (126 MHz, CDCl<sub>3</sub>)  $\delta$  144.74 (q, J=1.0 Hz), 139.77 , 128.97 (q, J=32.5 Hz), 128.97 , 128.17 , 127.41 , 127.26 , 125.69 (q, J = 3.8 Hz), 124.32 (q, J = 271.9 Hz). **<sup>19</sup>F NMR** (565 MHz, CDCl<sub>3</sub>)  $\delta$  -62.41 . **HRMS** (EI-TOF) calcd for C<sub>13</sub>H<sub>9</sub>F<sub>3</sub>: 222.0656; Found: 222.0659. NMR spectroscopic data agreed with literature values.<sup>1</sup>

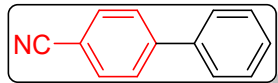

[1,1'-biphenyl]-4-carbonitrile (**3h**)

White solid, 70% yield, **<sup>1</sup>H NMR** (500 MHz, CDCl<sub>3</sub>)  $\delta$  7.77 – 7.73 (m, 2H), 7.72 – 7.69 (m, 2H), 7.63 – 7.58 (m, 2H), 7.52 – 7.48 (m, 2H), 7.47 – 7.42 (m, 1H). **<sup>13</sup>C NMR** (126 MHz, CDCl<sub>3</sub>)  $\delta$  145.73 , 139.23 , 132.62 , 129.13 , 128.68 , 127.76 , 127.25 , 118.93 , 110.98 . **HRMS** (EI-TOF) calcd for C<sub>13</sub>H<sub>9</sub>N: 179.0735; Found: 179.0739. NMR spectroscopic data agreed with literature values.<sup>1</sup>

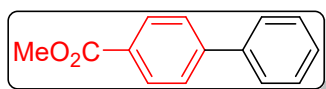

methyl [1,1'-biphenyl]-4-carboxylate (**3i**)

White solid, 72% yield, **<sup>1</sup>H NMR** (500 MHz, CDCl<sub>3</sub>)  $\delta$  8.13 (d, J = 8.4 Hz, 2H), 7.68 (d, J = 8.5 Hz, 2H), 7.64 (d, J = 7.2 Hz, 2H), 7.49 (t, J = 7.5 Hz, 2H), 7.41 (t, J = 7.4 Hz, 1H), 3.96 (s, 3H). **<sup>13</sup>C NMR** (126 MHz, CDCl<sub>3</sub>)  $\delta$  167.02 , 145.67 , 140.04 ,

130.11 , 128.93 , 128.14 , 127.29 , 127.06 , 52.11 . **HRMS** (EI-TOF) calcd for  $C_{14}H_{12}O_2$ : 212.0837; Found: 212.0842. NMR spectroscopic data agreed with literature values.<sup>1</sup>

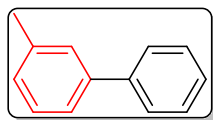

### 3-methyl-1,1'-biphenyl (**3j**)

White solid, 75% yield, **<sup>1</sup>H NMR** (500 MHz,  $CDCl_3$ )  $\delta$  7.60 (dd,  $J = 8.3, 1.0$  Hz, 2H), 7.50 – 7.31 (m, 6H), 7.18 (d,  $J = 7.5$  Hz, 1H), 2.44 (s, 3H). **<sup>13</sup>C NMR** (126 MHz,  $CDCl_3$ )  $\delta$  157.49 , 141.42 , 128.71 , 128.68 , 128.02 , 127.21 , 127.18 , 124.30 , 21.56 . **HRMS** (EI-TOF) calcd for  $C_{13}H_{12}$ : 168.0939; Found: 168.0940. NMR spectroscopic data agreed with literature values.<sup>5</sup>

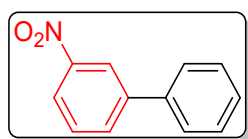

### 3-nitro-1,1'-biphenyl (**3k**)

Yellow solid, 35% yield, **<sup>1</sup>H NMR** (500 MHz,  $CDCl_3$ )  $\delta$  8.48 (s, 1H), 8.22 (d,  $J = 8.2$  Hz, 1H), 7.94 (d,  $J = 8.3$  Hz, 1H), 7.67 – 7.60 (m, 3H), 7.52 (t,  $J = 7.5$  Hz, 2H), 7.45 (t,  $J = 7.4$  Hz, 1H). **<sup>13</sup>C NMR** (126 MHz,  $CDCl_3$ )  $\delta$  142.95 , 138.74 , 129.72 , 129.20 , 128.57 , 127.20 , 122.06 , 122.01 . **HRMS** (EI-TOF) calcd for  $C_{12}H_9NO_2$ : 199.0633; Found: 199.0641. NMR spectroscopic data agreed with literature values.<sup>6</sup>

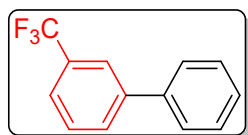

### 3-(trifluoromethyl)-1,1'-biphenyl (**3l**)

Yellow solid, 84% yield, **<sup>1</sup>H NMR** (500 MHz,  $CDCl_3$ )  $\delta$  7.86 (s, 1H), 7.79 (d,  $J = 7.6$  Hz, 1H), 7.66 – 7.54 (m, 4H), 7.50 (t,  $J = 7.6$  Hz, 2H), 7.42 (t,  $J = 7.3$  Hz, 1H). **<sup>13</sup>C**

**NMR** (126 MHz, CDCl<sub>3</sub>)  $\delta$  142.05 , 139.80 , 131.21 (q, J = 32.2 Hz), 130.42 , 129.22 , 129.00 , 128.03 , 127.20 , 125.30 (q, J=272.2 Hz), 123.96 (q, J = 3.6 Hz). **<sup>19</sup>F NMR** (565 MHz, CDCl<sub>3</sub>)  $\delta$  -62.60 . **HRMS** (EI-TOF) calcd for C<sub>13</sub>H<sub>9</sub>F<sub>3</sub>: 222.0656; Found: 222.0659. NMR spectroscopic data agreed with literature values.<sup>7</sup>

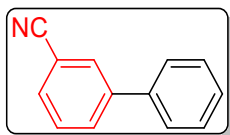

[1,1'-biphenyl]-3-carbonitrile (**3m**)

White solid, 65% yield, **<sup>1</sup>H NMR** (500 MHz, CDCl<sub>3</sub>)  $\delta$  7.88 (dd, 1H, J=1.5 Hz, 2.0 Hz), 7.81 (m, 1H), 7.67 – 7.41 (m, 7H). **<sup>13</sup>C NMR** (126 MHz, CDCl<sub>3</sub>)  $\delta$  142.52 , 138.93 , 131.52 , 130.74 , 129.62 , 129.15 , 128.42 , 127.12 , 118.86 , 113.03 . **HRMS** (EI-TOF) calcd for C<sub>13</sub>H<sub>9</sub>N: 179.0735; Found: 179.0739. NMR spectroscopic data agreed with literature values.<sup>1</sup>

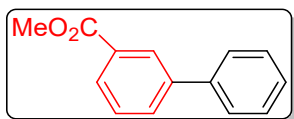

methyl [1,1'-biphenyl]-3-carboxylate (**3n**)

White solid, 77% yield, **<sup>1</sup>H NMR** (500 MHz, CDCl<sub>3</sub>)  $\delta$  8.31 (s, 1H), 8.04 (d, J = 7.8 Hz, 1H), 7.83 – 7.78 (m, 1H), 7.67 – 7.62 (m, 2H), 7.56 – 7.45 (m, 3H), 7.43 – 7.38 (m, 1H), 3.97 (s, 3H). **<sup>13</sup>C NMR** (126 MHz, CDCl<sub>3</sub>)  $\delta$  167.06 , 141.50 , 140.14 , 131.53 , 130.73 , 128.89 , 128.85 , 128.35 , 128.28 , 127.75 , 127.17 , 52.18 . **HRMS** (EI-TOF) calcd for C<sub>14</sub>H<sub>12</sub>O<sub>2</sub>: 212.0837; Found: 212.0842. NMR spectroscopic data agreed with literature values.<sup>8</sup>

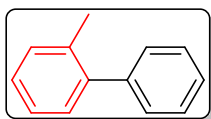

2-methyl-1,1'-biphenyl (**3o**)

White solid, 75% yield,  $^1\text{H NMR}$  (500 MHz,  $\text{CDCl}_3$ )  $\delta$  7.46 – 7.24 (m, 9H), 2.29 (s, 3H).  $^{13}\text{C NMR}$  (126 MHz,  $\text{CDCl}_3$ )  $\delta$  142.02 , 141.99 , 135.37 , 130.31 , 129.81 , 129.21 , 128.08 , 127.26 , 126.77 , 125.76 , 20.46 . **HRMS** (EI-TOF) calcd for  $\text{C}_{13}\text{H}_{12}$ : 168.0939; Found: 168.0940. NMR spectroscopic data agreed with literature values.<sup>1</sup>

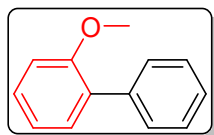

2-methoxy-1,1'-biphenyl (**3p**)

White solid, 91% yield,  $^1\text{H NMR}$  (500 MHz,  $\text{CDCl}_3$ )  $\delta$  7.60 – 7.53 (m, 2H), 7.47 – 7.41 (m, 2H), 7.40 – 7.32 (m, 3H), 7.09 – 7.01 (m, 2H), 3.84 (s, 3H).  $^{13}\text{C NMR}$  (126 MHz,  $\text{CDCl}_3$ )  $\delta$  156.50 , 138.57 , 130.89 , 130.78 , 129.54 , 128.60 , 127.96 , 126.89 , 120.84 , 111.29 , 55.56 . **HRMS** (EI-TOF) calcd for  $\text{C}_{14}\text{H}_{12}\text{O}_2$ : 212.0837; Found: 212.0845. NMR spectroscopic data agreed with literature values.<sup>1</sup>

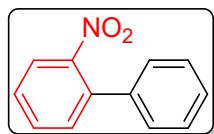

2-nitro-1,1'-biphenyl (**3q**)

Yellow oil, 52% yield,  $^1\text{H NMR}$  (500 MHz,  $\text{CDCl}_3$ )  $\delta$  7.87 (d,  $J$  = 8.0 Hz, 1H), 7.63 (t,  $J$  = 8.1 Hz, 1H), 7.53 – 7.41 (m, 5H), 7.37 – 7.30 (m, 2H).  $^{13}\text{C NMR}$  (126 MHz,  $\text{CDCl}_3$ )  $\delta$  149.34 , 137.39 , 136.36 , 132.24 , 131.95 , 128.67 , 128.22 , 128.14 , 127.89 , 124.05 . **HRMS** (EI-TOF) calcd for  $\text{C}_{12}\text{H}_9\text{NO}_2$ : 199.0633; Found: 199.0641. NMR spectroscopic data agreed with literature values.<sup>9</sup>

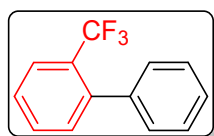

2-(trifluoromethyl)-1,1'-biphenyl (**3r**)



Yellow solid, 64% yield,  $^1\text{H NMR}$  (600 MHz,  $\text{CDCl}_3$ )  $\delta$  7.78 (d,  $J = 7.9$  Hz, 1H), 7.59 (t,  $J = 7.5$  Hz, 1H), 7.50 (d,  $J = 7.6$  Hz, 1H), 7.46 – 7.40 (m, 3H), 7.39 – 7.33 (m, 3H).  $^{13}\text{C NMR}$  (151 MHz,  $\text{CDCl}_3$ )  $\delta$  141.44 (q,  $J = 2.6$  Hz), 139.86, 132.04, 131.28, 128.96, 128.47 (q,  $J = 29.7$  Hz), 127.74, 127.61, 127.32, 126.05 (q,  $J = 5.3$  Hz), 124.17 (q,  $J = 274.0$  Hz).  $^{19}\text{F NMR}$  (565 MHz,  $\text{CDCl}_3$ )  $\delta$  -56.85. **HRMS** (EI-TOF) calcd for  $\text{C}_{13}\text{H}_9\text{F}_3$ : 222.0656; Found: 222.0661. NMR spectroscopic data agreed with literature values.<sup>10</sup>

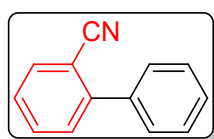

[1,1'-biphenyl]-2-carbonitrile (**3s**)

Yellow solid, 77% yield,  $^1\text{H NMR}$  (500 MHz,  $\text{CDCl}_3$ )  $\delta$  7.79 (d,  $J = 7.8$  Hz, 1H), 7.67 (t,  $J = 7.7$  Hz, 1H), 7.61 – 7.56 (m, 2H), 7.55 – 7.44 (m, 5H).  $^{13}\text{C NMR}$  (126 MHz,  $\text{CDCl}_3$ )  $\delta$  145.53, 138.16, 133.75, 132.79, 130.08, 128.76, 128.73, 128.72, 127.53, 118.69, 111.34. **HRMS** (EI-TOF) calcd for  $\text{C}_{13}\text{H}_9\text{N}$ : 179.0735; Found: 179.0739. NMR spectroscopic data agreed with literature values.<sup>11</sup>

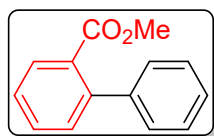

methyl [1,1'-biphenyl]-2-carboxylate (**3t**)

White solid, 79% yield,  $^1\text{H NMR}$  (500 MHz,  $\text{CDCl}_3$ )  $\delta$  7.84 (dd,  $J = 7.7, 1.0$  Hz, 1H), 7.55 (td,  $J = 7.6, 1.3$  Hz, 1H), 7.47 – 7.31 (m, 7H), 3.65 (s, 3H).  $^{13}\text{C NMR}$  (126 MHz,  $\text{CDCl}_3$ )  $\delta$  169.15, 142.50, 141.34, 131.24, 130.90, 130.71, 129.77, 128.32, 128.03, 127.22, 127.15, 51.91. **HRMS** (EI-TOF) calcd for  $\text{C}_{14}\text{H}_{12}\text{O}_2$ : 212.0837; Found: 212.0842. NMR spectroscopic data agreed with literature values.<sup>12</sup>

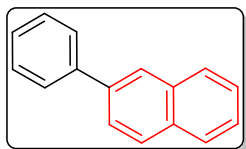

2-phenylnaphthalene (**3aa**)

White solid, 56% yield,  $^1\text{H NMR}$  (500 MHz,  $\text{CDCl}_3$ )  $\delta$  8.07 (s, 1H), 7.93 (t,  $J = 8.8$  Hz, 2H), 7.89 (d,  $J = 7.4$  Hz, 1H), 7.78 (dd,  $J = 8.5, 1.8$  Hz, 1H), 7.75 (d,  $J = 7.1$  Hz, 2H), 7.55 – 7.48 (m, 4H), 7.40 (t,  $J = 7.4$  Hz, 1H).  $^{13}\text{C NMR}$  (126 MHz,  $\text{CDCl}_3$ )  $\delta$  141.18, 138.62, 133.73, 132.67, 128.88, 128.43, 128.22, 127.67, 127.46, 127.37, 126.31, 125.95, 125.83, 125.63. **HRMS** (EI-TOF) calcd for  $\text{C}_{16}\text{H}_{12}$ : 204.0939; Found: 204.0945. NMR spectroscopic data agreed with literature values.<sup>1</sup>

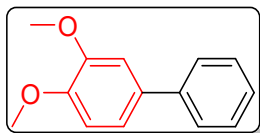

3,4-dimethoxy-1,1'-biphenyl (**3ab**)

Yellow solid, 53% yield,  $^1\text{H NMR}$  (500 MHz,  $\text{CDCl}_3$ )  $\delta$  7.58 (d,  $J = 7.1$  Hz, 2H), 7.44 (t,  $J = 7.7$  Hz, 2H), 7.34 (t,  $J = 7.4$  Hz, 1H), 7.19 – 7.13 (m, 2H), 6.97 (d,  $J = 8.3$  Hz, 1H), 3.97 (s, 3H), 3.94 (s, 3H).  $^{13}\text{C NMR}$  (126 MHz,  $\text{CDCl}_3$ )  $\delta$  149.19, 148.65, 141.06, 134.29, 128.71, 126.85, 126.83, 119.41, 111.56, 110.56, 56.00, 55.96. **HRMS** (EI-TOF) calcd for  $\text{C}_{14}\text{H}_{14}\text{O}_2$ : 214.0994; Found: 214.1004. NMR spectroscopic data agreed with literature values.<sup>13</sup>

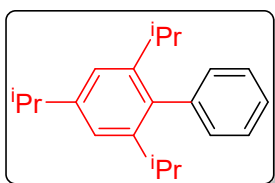

2,4,6-triisopropyl-1,1'-biphenyl (**3ac**)

White solid, 67% yield,  $^1\text{H NMR}$  (500 MHz,  $\text{CDCl}_3$ )  $\delta$  7.44 – 7.34 (m, 3H), 7.21 (dd,  $J = 8.1, 1.3$  Hz, 2H), 7.09 (s, 2H), 2.98 (hept,  $J = 7.0$  Hz, 1H), 2.64 (hept,  $J = 6.9$  Hz, 2H), 1.35 (d,  $J = 6.9$  Hz, 6H), 1.11 (d,  $J = 6.9$  Hz, 12H).  $^{13}\text{C NMR}$  (126 MHz,  $\text{CDCl}_3$ )

$\delta$  147.84 , 146.53 , 140.93 , 137.11 , 129.85 , 127.90 , 126.39 , 120.52 , 34.30 , 30.29 , 24.23 , 24.11 . **HRMS** (EI-TOF) calcd for  $C_{21}H_{28}$ : 280.2191; Found: 280.2204. NMR spectroscopic data agreed with literature values.<sup>14</sup>

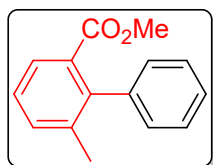

methyl 6-methyl-[1,1'-biphenyl]-2-carboxylate (**3ad**)

White solid, 53% yield, **<sup>1</sup>H NMR** (500 MHz,  $CDCl_3$ )  $\delta$  7.71 (d,  $J = 7.7$  Hz, 1H), 7.42 (t,  $J = 7.3$  Hz, 3H), 7.39 – 7.31 (m, 2H), 7.19 (d,  $J = 6.9$  Hz, 2H), 3.56 (s, 3H), 2.14 (s, 3H). **<sup>13</sup>C NMR** (126 MHz,  $CDCl_3$ )  $\delta$  168.74 , 141.78 , 140.25 , 137.15 , 133.02 , 131.60 , 128.54 , 127.86 , 127.01 , 126.93 , 126.81 , 51.68 , 20.65 . **HRMS** (EI-TOF) calcd for  $C_{15}H_{14}O_2$ : 226.0994; Found: 226.0993. NMR spectroscopic data agreed with literature values.<sup>15</sup>

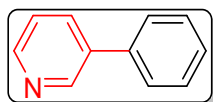

3-phenylpyridine (**3ae**)

Brown oil, 45% yield, **<sup>1</sup>H NMR** (500 MHz,  $CDCl_3$ )  $\delta$  8.89 (s, 1H), 8.62 (d,  $J = 4.0$  Hz, 1H), 7.94 (dd,  $J = 8.0, 1.5$  Hz, 1H), 7.71 – 7.41 (m, 6H). **<sup>13</sup>C NMR** (126 MHz,  $CDCl_3$ )  $\delta$  147.93 , 147.89 , 137.61 , 136.99 , 134.92 , 129.15 , 128.27 , 127.18 , 123.78 . **HRMS** (EI-TOF) calcd for  $C_{11}H_9N$ : 155.0735; Found: 155.0740. NMR spectroscopic data agreed with literature values.<sup>16</sup>

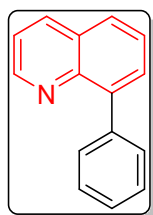

8-phenylquinoline (**3af**)

Yellow oil, 37% yield,  $^1\text{H NMR}$  (500 MHz,  $\text{CDCl}_3$ )  $\delta$  8.99 (dd,  $J = 4.1, 1.6$  Hz, 1H), 8.24 (dd,  $J = 8.2, 1.6$  Hz, 1H), 7.89 – 7.68 (m, 4H), 7.66 – 7.50 (m, 3H), 7.47 – 7.44 (m, 1H), 7.44 – 7.42 (m, 1H).  $^{13}\text{C NMR}$  (126 MHz,  $\text{CDCl}_3$ )  $\delta$  150.17, 145.86, 140.86, 139.46, 136.43, 130.60, 130.42, 128.76, 128.02, 127.53, 127.41, 126.33, 120.98. **HRMS** (EI-TOF) calcd for  $\text{C}_{15}\text{H}_{11}\text{N}$ : 205.0891; Found: 205.0897. NMR spectroscopic data agreed with literature values.<sup>17</sup>

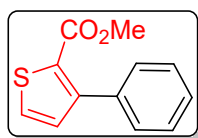

methyl 3-phenylthiophene-2-carboxylate (**3ag**)

Colorless solid, 37% yield,  $^1\text{H NMR}$  (500 MHz,  $\text{CDCl}_3$ )  $\delta$  7.52 (d,  $J = 5.1$  Hz, 1H), 7.50 – 7.38 (m, 5H), 7.11 (d,  $J = 5.1$  Hz, 1H), 3.79 (s, 3H).  $^{13}\text{C NMR}$  (126 MHz,  $\text{CDCl}_3$ )  $\delta$  162.48, 148.71, 135.70, 131.58, 130.19, 129.23, 127.93, 127.84, 126.96, 51.90. **HRMS** (EI-TOF) calcd for  $\text{C}_{12}\text{H}_{10}\text{O}_2\text{S}$ : 218.0402; Found: 218.0416. NMR spectroscopic data agreed with literature values.<sup>18</sup>

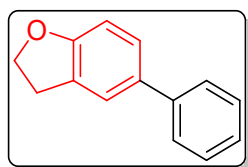

2,3-Dihydro-5-phenylbenzofuran (**3ah**)

Yellow oil, 65% yield,  $^1\text{H NMR}$  (500 MHz,  $\text{CDCl}_3$ )  $\delta$  7.56 (d,  $J = 7.1$  Hz, 2H), 7.47 – 7.40 (m, 3H), 7.38 (d,  $J = 10.2$  Hz, 1H), 7.32 (t,  $J = 7.4$  Hz, 1H), 6.89 (d,  $J = 8.2$  Hz, 1H), 4.64 (t,  $J = 8.7$  Hz, 2H), 3.29 (t,  $J = 8.7$  Hz, 2H).  $^{13}\text{C NMR}$  (126 MHz,  $\text{CDCl}_3$ )  $\delta$  141.35, 133.99, 128.67, 127.60, 127.07, 126.79, 126.49, 123.76, 109.44, 71.44, 29.77. **HRMS** (EI-TOF) calcd for  $\text{C}_{14}\text{H}_{12}\text{O}$ : 196.0888; Found: 196.0896. NMR spectroscopic data agreed with literature values.<sup>2</sup>

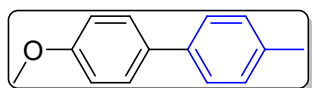

#### 4-methoxy-4'-methyl-1,1'-biphenyl (**3ba**)

White solid, 61% yield,  $^1\text{H NMR}$  (500 MHz,  $\text{CDCl}_3$ )  $\delta$  7.53 (d,  $J = 8.8$  Hz, 2H), 7.47 (d,  $J = 8.1$  Hz, 2H), 7.25 (d,  $J = 7.9$  Hz, 2H), 6.99 (d,  $J = 8.8$  Hz, 2H), 3.87 (s, 3H), 2.41 (s, 3H).  $^{13}\text{C NMR}$  (126 MHz,  $\text{CDCl}_3$ )  $\delta$  158.99 , 138.02 , 136.37 , 133.81 , 129.46 , 127.98 , 126.61 , 114.21 , 55.37 , 21.06 . **HRMS** (EI-TOF) calcd for  $\text{C}_{14}\text{H}_{14}\text{O}$ : 198.1045; Found: 198.1054. NMR spectroscopic data agreed with literature values.<sup>2</sup>

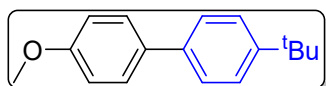

#### 4-(tert-butyl)-4'-methoxy-1,1'-biphenyl (**3bb**)

White solid, 51% yield,  $^1\text{H NMR}$  (500 MHz,  $\text{CDCl}_3$ )  $\delta$  7.56 (d,  $J = 8.0$  Hz, 1H), 7.54 (d,  $J = 8.5$  Hz, 1H), 7.52 (d,  $J = 2.1$  Hz, 1H), 7.48 (d,  $J = 2.0$  Hz, 1H), 7.46 (d,  $J = 2.0$  Hz, 1H), 7.00 (d,  $J = 8.7$  Hz, 1H), 3.87 (s, 3H), 1.39 (s, 8H).  $^{13}\text{C NMR}$  (126 MHz,  $\text{CDCl}_3$ )  $\delta$  158.97 , 149.63 , 137.95 , 133.68 , 128.01 , 126.37 , 125.67 , 114.17 , 55.34 , 34.49 , 31.40 . **HRMS** (EI-TOF) calcd for  $\text{C}_{17}\text{H}_{20}\text{O}$ : 240.1514; Found: 240.1525. NMR spectroscopic data agreed with literature values.<sup>19</sup>

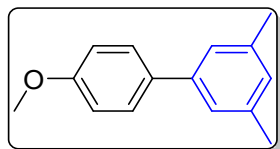

#### 4'-methoxy-3,5-dimethyl-1,1'-biphenyl (**3bc**)

White solid, 61% yield,  $^1\text{H NMR}$  (500 MHz,  $\text{CDCl}_3$ )  $\delta$  7.54 (d,  $J = 8.7$  Hz, 2H), 7.20 (s, 2H), 6.99 (d,  $J = 4.5$  Hz, 3H), 3.87 (s, 3H), 2.40 (s, 6H).  $^{13}\text{C NMR}$  (126 MHz,  $\text{CDCl}_3$ )  $\delta$  159.04 , 140.86 , 138.19 , 134.04 , 128.32 , 128.16 , 124.71 , 114.10 , 55.34 , 21.42 . **HRMS** (EI-TOF) calcd for  $\text{C}_{15}\text{H}_{16}\text{O}$ : 212.1201; Found: 212.1213. NMR spectroscopic data agreed with literature values.<sup>20</sup>

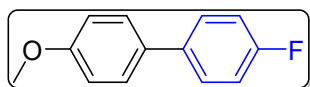

#### 4-fluoro-4'-methoxy-1,1'-biphenyl (**3bd**)

White solid, 62% yield,  $^1\text{H NMR}$  (500 MHz,  $\text{CDCl}_3$ )  $\delta$  7.55 – 7.45 (m, 4H), 7.16 – 7.08 (m, 2H), 7.01 – 6.97 (m, 2H), 3.87 (s, 3H).  $^{13}\text{C NMR}$  (126 MHz,  $\text{CDCl}_3$ )  $\delta$  162.12 (d,  $J = 245.5$  Hz), 159.15, 136.99, 132.88, 128.23 (d,  $J = 8.0$  Hz), 128.04, 115.53 (d,  $J = 21.4$  Hz), 114.28, 55.37.  $^{19}\text{F NMR}$  (565 MHz,  $\text{CDCl}_3$ )  $\delta$  -116.76. **HRMS** (EI-TOF) calcd for  $\text{C}_{13}\text{H}_{11}\text{OF}$ : 202.0794; Found: 202.0803. NMR spectroscopic data agreed with literature values.<sup>1</sup>

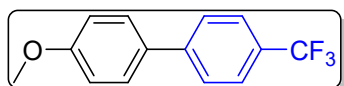

#### 4-methoxy-4'-(trifluoromethyl)-1,1'-biphenyl (**3be**)

White solid, 56% yield,  $^1\text{H NMR}$  (500 MHz,  $\text{CDCl}_3$ )  $\delta$  7.72 – 7.63 (m, 4H), 7.56 (d,  $J = 8.8$  Hz, 2H), 7.02 (d,  $J = 8.8$  Hz, 2H), 3.88 (s, 3H).  $^{13}\text{C NMR}$  (126 MHz,  $\text{CDCl}_3$ )  $\delta$  159.88, 144.33, 132.22, 128.73 (q,  $J = 32.5$  Hz), 128.36, 126.89, 125.68 (q,  $J = 3.8$  Hz), 124.40 (q,  $J = 272.2$  Hz), 114.46, 55.41.  $^{19}\text{F NMR}$  (565 MHz,  $\text{CDCl}_3$ )  $\delta$  -62.33. **HRMS** (EI-TOF) calcd for  $\text{C}_{14}\text{H}_{11}\text{OF}_3$ : 252.0762; Found: 252.0770. NMR spectroscopic data agreed with literature values.<sup>1</sup>

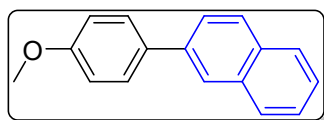

#### 2-(4-methoxyphenyl)naphthalene (**3bf**)

White solid, 50% yield,  $^1\text{H NMR}$  (500 MHz,  $\text{CDCl}_3$ )  $\delta$  8.01 (s, 1H), 7.94 – 7.85 (m, 3H), 7.74 (dd,  $J = 8.5, 1.7$  Hz, 1H), 7.69 (d,  $J = 8.7$  Hz, 2H), 7.55 – 7.45 (m, 3H), 7.05 (d,  $J = 8.7$  Hz, 2H), 3.90 (s, 3H).  $^{13}\text{C NMR}$  (126 MHz,  $\text{CDCl}_3$ )  $\delta$  159.31, 138.20, 133.80, 133.69, 132.36, 128.45, 128.35, 128.07, 127.64, 126.24, 125.66, 125.46, 125.06, 114.37, 55.41. **HRMS** (EI-TOF) calcd for  $\text{C}_{17}\text{H}_{14}\text{O}$ : 234.1045; Found: 234.1053. NMR spectroscopic data agreed with literature values.<sup>19</sup>

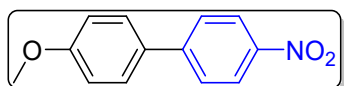

4-methoxy-4'-nitro-1,1'-biphenyl (**3bg**)

White solid, 37% yield,  $^1\text{H NMR}$  (500 MHz,  $\text{CDCl}_3$ )  $\delta$  8.28 (d,  $J = 8.9$  Hz, 2H), 7.71 (d,  $J = 8.9$  Hz, 2H), 7.62 – 7.58 (m, 2H), 7.04 (d,  $J = 8.8$  Hz, 2H), 3.89 (s, 3H).  $^{13}\text{C NMR}$  (126 MHz,  $\text{CDCl}_3$ )  $\delta$  160.48 , 147.23 , 146.59 , 131.12 , 128.58 , 127.08 , 124.15 , 114.64 , 55.44 . **HRMS** (EI-TOF) calcd for  $\text{C}_{13}\text{H}_{11}\text{NO}_3$ : 229.0739; Found: 229.0753. NMR spectroscopic data agreed with literature values.<sup>21</sup>

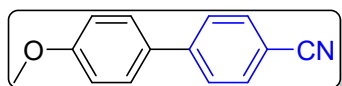

4'-methoxy-[1,1'-biphenyl]-4-carbonitrile (**3bh**)

White solid, 32% yield,  $^1\text{H NMR}$  (500 MHz,  $\text{CDCl}_3$ )  $\delta$  7.75 – 7.63 (m, 4H), 7.55 (d,  $J = 8.8$  Hz, 2H), 7.02 (d,  $J = 8.8$  Hz, 2H), 3.88 (s, 3H).  $^{13}\text{C NMR}$  (126 MHz,  $\text{CDCl}_3$ )  $\delta$  160.21 , 145.22 , 132.54 , 131.51 , 128.34 , 127.09 , 119.04 , 114.55 , 110.12 , 55.39 . **HRMS** (EI-TOF) calcd for  $\text{C}_{14}\text{H}_{11}\text{NO}$ : 209.0841; Found: 209.0857. NMR spectroscopic data agreed with literature values.<sup>1</sup>

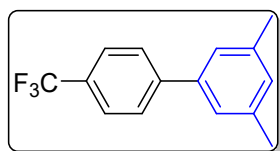

3,5-dimethyl-4'-(trifluoromethyl)-1,1'-biphenyl (**3ca**)

White solid, 72% yield,  $^1\text{H NMR}$  (500 MHz,  $\text{CDCl}_3$ )  $\delta$  7.72 – 7.65 (m, 4H), 7.23 (s, 2H), 7.07 (s, 1H), 2.41 (s, 6H).  $^{13}\text{C NMR}$  (126 MHz,  $\text{CDCl}_3$ )  $\delta$  145.04 , 139.82 , 138.57 , 129.81 , 127.43 , 125.59 (q,  $J = 3.8$  Hz), 125.21 , 21.39 .  $^{19}\text{F NMR}$  (565 MHz,  $\text{CDCl}_3$ )  $\delta$  -62.35 . **HRMS** (EI-TOF) calcd for  $\text{C}_{15}\text{H}_{13}\text{F}_3$ : 250.0969; Found: 250.0980. NMR spectroscopic data agreed with literature values.<sup>22</sup>

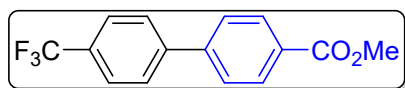

methyl 4'-(trifluoromethyl)-[1,1'-biphenyl]-4-carboxylate (**3cb**)

White solid, 64% yield,  $^1\text{H NMR}$  (500 MHz,  $\text{CDCl}_3$ )  $\delta$  8.16 (d,  $J = 8.4$  Hz, 2H), 7.74

(s, 4H), 7.68 (d,  $J = 8.4$  Hz, 2H), 3.97 (s, 3H).  $^{13}\text{C}$  NMR (126 MHz,  $\text{CDCl}_3$ )  $\delta$  166.77 , 144.10 , 143.57 , 130.35 (q,  $J = 32.8$  Hz), 130.29 , 129.87 , 127.64 , 127.28 , 125.89 (q,  $J = 3.8$  Hz), 125.25 (q,  $J = 272.4$  Hz), 52.25 .  $^{19}\text{F}$  NMR (565 MHz,  $\text{CDCl}_3$ )  $\delta$  -62.54 . **HRMS** (EI-TOF) calcd for  $\text{C}_{15}\text{H}_{11}\text{O}_2\text{F}_3$ : 280.0711; Found: 280.0719. NMR spectroscopic data agreed with literature values.<sup>23</sup>

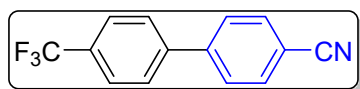

4'-(trifluoromethyl)-[1,1'-biphenyl]-4-carbonitrile (**3cc**)

White solid, 85% yield,  $^1\text{H}$  NMR (500 MHz,  $\text{CDCl}_3$ )  $\delta$  7.79 (d,  $J = 8.3$  Hz, 2H), 7.76 (d,  $J = 8.4$  Hz, 2H), 7.73 – 7.70 (m, 4H).  $^{13}\text{C}$  NMR (126 MHz,  $\text{CDCl}_3$ )  $\delta$  144.17 , 142.70 , 132.80 , 130.76 (q,  $J = 32.8$  Hz), 127.98 , 127.64 , 126.09 (q,  $J = 3.8$  Hz), 125.10 (q,  $J = 272.7$  Hz) , 118.55 , 112.06 .  $^{19}\text{F}$  NMR (565 MHz,  $\text{CDCl}_3$ )  $\delta$  -62.64 . **HRMS** (EI-TOF) calcd for  $\text{C}_{14}\text{H}_8\text{NF}_3$ : 247.0609; Found: 247.0604. NMR spectroscopic data agreed with literature values.<sup>24</sup>

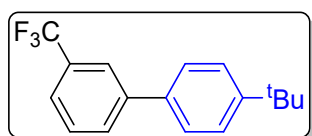

4'-(tert-butyl)-3-(trifluoromethyl)-1,1'-biphenyl (**3cd**)

Yellow solid, 80% yield,  $^1\text{H}$  NMR (500 MHz,  $\text{CDCl}_3$ )  $\delta$  7.85 (s, 1H), 7.78 (s, 1H), 7.61 – 7.50 (m, 6H), 1.39 (s, 9H).  $^{13}\text{C}$  NMR (126 MHz,  $\text{CDCl}_3$ )  $\delta$  151.22 , 141.90 , 136.88 , 131.27 (q,  $J = 32.1$  Hz), 130.24 , 129.16 , 126.86 , 125.97 , 123.82 (q,  $J = 3.7$  Hz), 123.66 (q,  $J = 3.6$  Hz), 34.64 , 31.35 .  $^{19}\text{F}$  NMR (565 MHz,  $\text{CDCl}_3$ )  $\delta$  -62.16 . **HRMS** (EI-TOF) calcd for  $\text{C}_{17}\text{H}_{17}\text{F}_3$ : 278.1282; Found: 278.1287. NMR spectroscopic data agreed with literature values.<sup>25</sup>

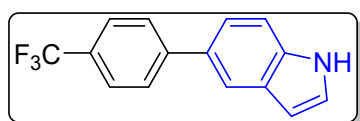



5-(4-(trifluoromethyl)phenyl)-1*H*-indole (**3ce**)

Yellow oil, 57% yield, <sup>1</sup>H NMR (500 MHz, CDCl<sub>3</sub>) δ 8.01 (dd, J = 8.3, 3.9 Hz, 3H), 7.71 (d, J = 8.4 Hz, 2H), 7.60 – 7.53 (m, 2H), 7.36 (t, J = 7.6 Hz, 1H), 7.28 (t, J = 7.5 Hz, 1H), 6.73 (d, J = 3.7 Hz, 1H). <sup>13</sup>C NMR (126 MHz, CDCl<sub>3</sub>) δ 141.61 , 135.40 (q, J = 33.2 Hz), 134.83 , 130.87 , 127.28 , 126.46 (q, J = 3.7 Hz), 126.11 , 125.05 , 123.85 , 122.91 (q, J = 273.0 Hz), 121.68 , 113.46 , 110.16 . <sup>19</sup>F NMR (565 MHz, CDCl<sub>3</sub>) δ - 63.37 . HRMS (EI-TOF) calcd for C<sub>15</sub>H<sub>10</sub>NF<sub>3</sub>: 261.0765; Found: 261.0778.

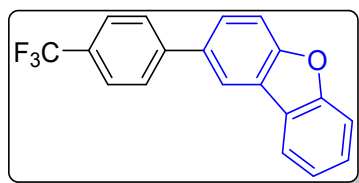

2-(4-(trifluoromethyl)phenyl)dibenzo[*b,d*]furan (**3cf**)

White solid, 78% yield, <sup>1</sup>H NMR (500 MHz, CDCl<sub>3</sub>) δ 8.09 – 7.98 (m, 4H), 7.82 (d, J = 8.2 Hz, 2H), 7.66 – 7.60 (m, 2H), 7.53 – 7.46 (m, 2H), 7.41 (t, J = 7.1 Hz, 1H). <sup>13</sup>C NMR (126 MHz, CDCl<sub>3</sub>) δ 156.21 , 153.32 , 140.06 , 129.08 , 127.52 , 126.82 , 125.60 (q, J = 3.8 Hz), 125.42 (q, J = 272.5 Hz), 125.23 , 124.21 (q, J = 46.6 Hz), 123.36 , 123.03 , 120.78 , 120.63 , 111.87 . <sup>19</sup>F NMR (565 MHz, CDCl<sub>3</sub>) δ -62.48 . HRMS (EI-TOF) calcd for C<sub>19</sub>H<sub>11</sub>OF<sub>3</sub>: 312.0762; Found: 312.0768.

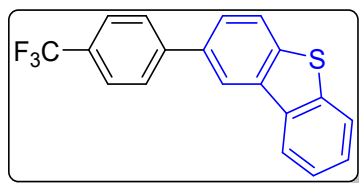

2-(4-(trifluoromethyl)phenyl)dibenzo[*b,d*]thiophene (**3cg**)

White solid, 71% yield, <sup>1</sup>H NMR (500 MHz, CDCl<sub>3</sub>) δ 8.26 – 8.20 (m, 2H), 7.90 – 7.84 (m, 3H), 7.80 (d, J = 8.2 Hz, 2H), 7.60 (t, J = 7.6 Hz, 1H), 7.53 – 7.48 (m, 3H). <sup>13</sup>C NMR (126 MHz, CDCl<sub>3</sub>) δ 144.17 , 139.38 , 138.47 , 136.52 , 135.64 , 135.56 , 130.10 (q, J = 32.8 Hz), 128.67 , 127.07 , 126.98 , 125.81 (q, J = 3.7 Hz), 125.22 , 124.61 , 123.12 (q, J = 272.4 Hz), 122.67 , 121.83 , 121.22 . <sup>19</sup>F NMR (565 MHz, CDCl<sub>3</sub>) δ - 62.48 . HRMS (EI-TOF) calcd for C<sub>19</sub>H<sub>11</sub>F<sub>3</sub>S: 328.0534; Found: 328.0530.

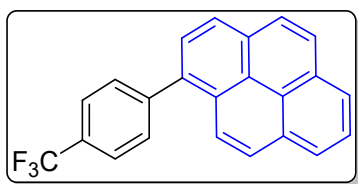

1-(4-(trifluoromethyl)phenyl)pyrene (**3ch**)

White solid, 82% yield,  $^1\text{H NMR}$  (500 MHz,  $\text{CDCl}_3$ )  $\delta$  8.28 – 8.20 (m, 3H), 8.14 (d,  $J = 2.0$  Hz, 2H), 8.10 – 8.04 (m, 3H), 7.97 (d,  $J = 7.8$  Hz, 1H), 7.85 (d,  $J = 8.0$  Hz, 2H), 7.77 (d,  $J = 8.0$  Hz, 2H).  $^{13}\text{C NMR}$  (126 MHz,  $\text{CDCl}_3$ )  $\delta$  144.99 , 136.02 , 131.48 , 131.12 , 130.91 , 129.63 , 129.38 , 128.45 , 128.01 , 127.88 , 127.36 , 126.22 , 125.47 , 125.36 (q,  $J = 3.7$  Hz), 125.15 , 124.89 (q,  $J = 16.1$  Hz), 124.71 , 124.64 , 122.34 (q,  $J = 297.6$  Hz).  $^{19}\text{F NMR}$  (565 MHz,  $\text{CDCl}_3$ )  $\delta$  -62.31 . **HRMS** (EI-TOF) calcd for  $\text{C}_{23}\text{H}_{13}\text{F}_3$ : 346.0969; Found: 346.0976. NMR spectroscopic data agreed with literature values.<sup>26</sup>

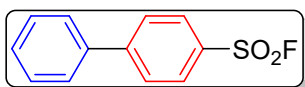

[1,1'-biphenyl]-4-sulfonyl fluoride (**A1**)

White solid, 82% yield,  $^1\text{H NMR}$  (500 MHz,  $\text{CDCl}_3$ )  $\delta$  8.09 (d,  $J = 8.5$  Hz, 2H), 7.84 (d,  $J = 8.3$  Hz, 2H), 7.67 – 7.63 (m, 2H), 7.58 – 7.46 (m, 3H).  $^{13}\text{C NMR}$  (126 MHz,  $\text{CDCl}_3$ )  $\delta$  148.64 , 138.50 , 131.37 (d,  $J = 24.5$  Hz), 129.26 , 129.21 , 128.98 , 128.19 , 127.45 .  $^{19}\text{F NMR}$  (565 MHz,  $\text{CDCl}_3$ )  $\delta$  66.51 . **HRMS** (EI-TOF) calcd for  $\text{C}_{12}\text{H}_9\text{FO}_2\text{S}$ : 236.0307; Found: 236.0302. NMR spectroscopic data agreed with literature values.<sup>27</sup>

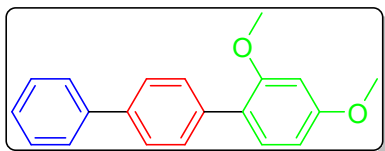

2,4-dimethoxy-1,1':4',1''-terphenyl (**A2**)

White solid, 73% yield,  $^1\text{H NMR}$  (500 MHz,  $\text{CDCl}_3$ )  $\delta$  7.69 – 7.58 (m, 6H), 7.50 – 7.43 (m, 2H), 7.40 – 7.34 (m, 1H), 7.34 – 7.30 (m, 1H), 6.62 (s, 1H), 6.61 (s, 1H),

3.89 (s, 3H), 3.85 (s, 3H).  $^{13}\text{C}$  NMR (126 MHz,  $\text{CDCl}_3$ )  $\delta$  160.50 , 157.65 , 141.20 , 139.40 , 137.49 , 131.28 , 129.87 , 128.80 , 127.16 , 126.83 , 123.25 , 104.84 , 99.17 , 55.67 , 55.52 . **HRMS** (EI-TOF) calcd for  $\text{C}_{20}\text{H}_{18}\text{O}_2$ : 290.1307; Found: 290.1312.

## 7. References

1. T. Zhou, P. P. Xie, C. L. Ji, X. Hong and M. Szostak, *Org. Lett.*, 2020, **22**, 6434-6440.
2. Q. Chen, S. Wu, S. Yan, C. Li, H. Abduhulam, Y. Shi, Y. Dang and C. Cao, *ACS Catal.*, 2020, **10**, 8168-8176.
3. Y. Sato, K. Nakamura, Y. Sumida, D. Hashizume, T. Hosoya and H. Ohmiya, *J. Am. Chem. Soc.*, 2020, **142**, 9938-9943.
4. J. H. Li and W. J. Liu, *Org. Lett.*, 2004, **6**, 2809-2811.
5. P. D. Stevens, J. D. Fan, H. M. R. Gardimalla, M. Yen and Y. Gao, *Org. Lett.*, 2005, **7**, 2085-2088.
6. L. Wu, B. L. Li, Y. Y. Huang, H. F. Zhou, Y. M. He and Q. H. Fan, *Org. Lett.*, 2006, **8**, 3605-3608.
7. Z. T. Zhang, J. P. Pitteloud, L. Cabrera, Y. Liang, M. Toribio and S. F. Wnuk, *Org. Lett.*, 2010, **12**, 816-819.
8. S. B. Taylor, M. Manzotti, G. J. Smith, S. A. Davis and R. B. Bedford, *ACS Catal.*, 2021, **11**, 3856-3866.
9. F. L. Zhou, F. J. Zhou, R. C. Su, Y. D. Yang and J. S. You, *Chem. Sci.*, 2020, **11**, 7424-7428.
10. L. L. Chu and F. L. Qing, *Org. Lett.*, 2010, **12**, 5060-5063.
11. W. J. Zhou, K. H. Wang and J. X. Wang, *J. Org. Chem.*, 2009, **74**, 5599-5602.
12. H. Chen, Z. B. Huang, X. M. Hu, G. Tang, P. X. Xu, Y. F. Zhao and C. H. Cheng, *J. Org. Chem.*, 2011, **76**, 2338-2344.
13. N. Kaloglu and I. Ozdemir, *Tetrahedron*, 2019, **75**, 2306-2313.
14. F. Y. Kwong, K. S. Chan, C. H. Yeung and A. S. C. Chan, *Chem. Commun.*, 2004, 2336-2337.
15. L. B. Huang, L. K. G. Ackerman, K. Kang, A. M. Parsons and D. J. Weix, *J. Am. Chem. Soc.*, 2019, **141**, 10978-10983.
16. E. Alacid and C. Najera, *Org. Lett.*, 2008, **10**, 5011-5014.

17. Y. D. Zhang, J. Gao, W. J. Li, H. Lee, B. Z. Lu and C. H. Senanayake, *J. Org. Chem.*, 2011, **76**, 6394-6400.
18. M. Raduan, J. Padrosa, A. Pla-Quintana, T. Parella and A. Roglans, *Adv. Synth. Catal.*, 2011, **353**, 2003-2012.
19. X. W. Yi, K. Chen, J. J. Guo, W. Chen and W. Z. Chen, *Adv. Synth. Catal.*, 2020, **362**, 4373-4377.
20. X. M. Li, T. T. Zhang, R. Hu, H. Zhang, C. Y. Ren and Z. L. Yuan, *Org. Biomol. Chem.*, 2020, **18**, 4748-4753.
21. G. Rizzo, G. Albano, M. Lo Presti, A. Milella, F. G. Omenetto and G. M. Farinola, *Eur. J. Org. Chem.*, 2020, **2020**, 6992-6996.
22. C. M. So, H. W. Lee, C. P. Lau, and F. Y. Kwong, *Org. Lett.*, 2009, **11**, 317-320.
23. T. L. Zhou, C. L. Ji, X. Hong and M. Szostak, *Chem. Sci.*, 2019, **10**, 9865-9871.
24. L. A. Zhang, T. H. Meng and J. Wu, *J. Org. Chem.*, 2007, **72**, 9346-9349.
25. D. Wang, H. G. Chen, X. C. Tian, X. X. Liang, F. Z. Chen and F. Gao, *Rsc. Adv.*, 2015, **5**, 107119-107122.
26. M. Beinhoff, W. Weigel, M. Jurczok, W. Rettig, C. Modrakowski, I. Brudgam, H. Hartl and A. D. Schluter, *Eur. J. Org. Chem.*, 2001, **2001**, 3819-3829.
27. P. K. Chinthakindi, H. G. Kruger, T. Govender, T. Naicker, and P. I. Arvidsson, *J. Org. Chem.*, 2016, **81**, (6), 2618-2623.

## 8: Copies of $^1\text{H}$ and $^{13}\text{C}$ spectra for coupling products.

$^1\text{H}$  NMR (500 MHz,  $\text{CDCl}_3$ )

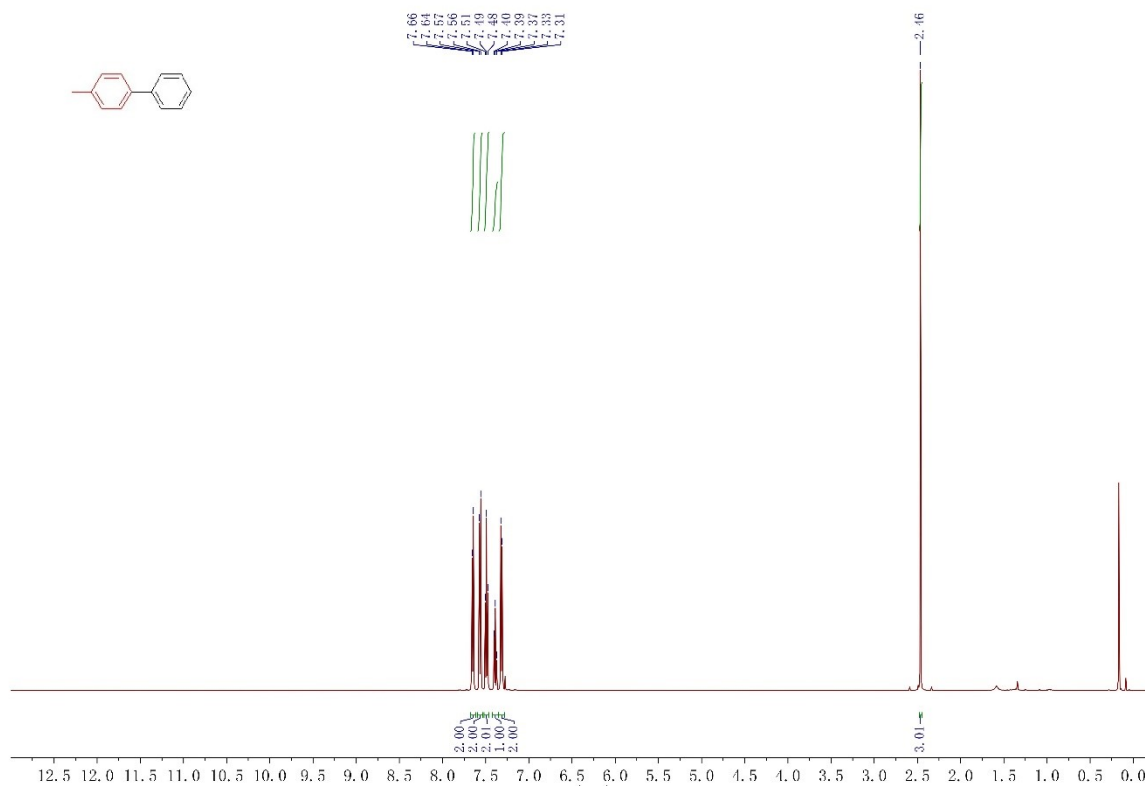

$^{13}\text{C}$  NMR (126 MHz,  $\text{CDCl}_3$ )

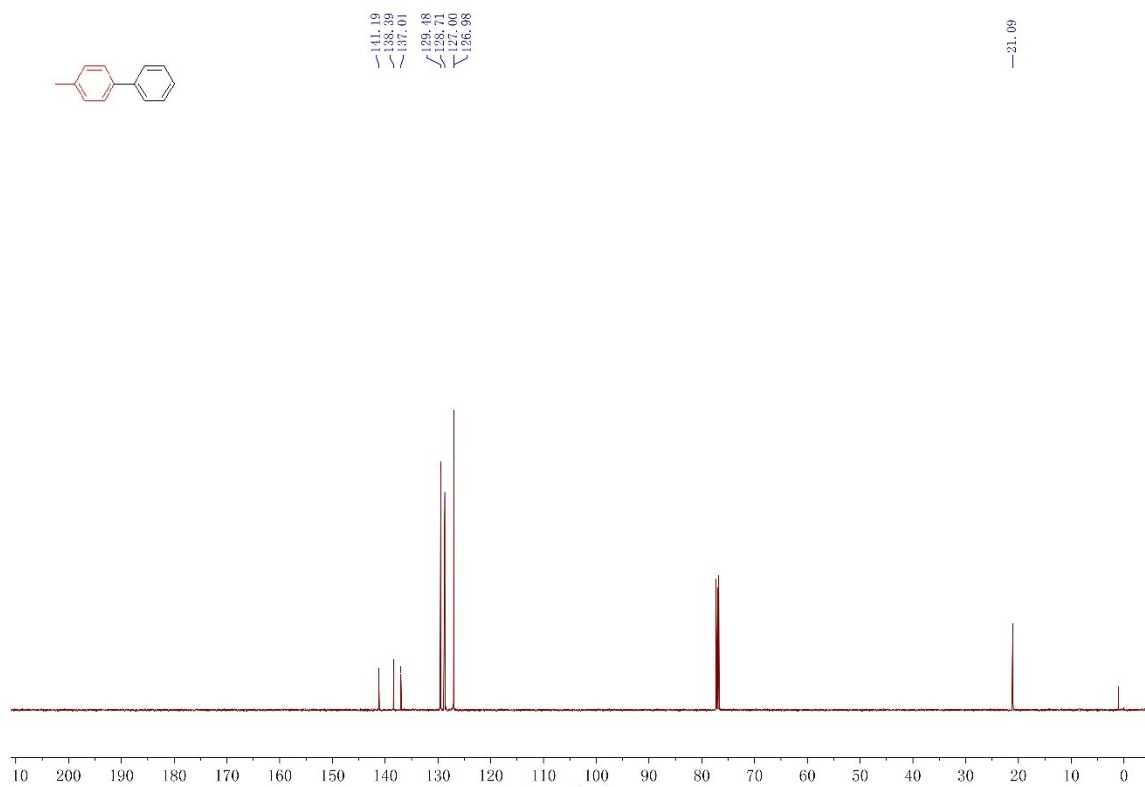

### <sup>1</sup>H NMR (500 MHz, CDCl<sub>3</sub>)

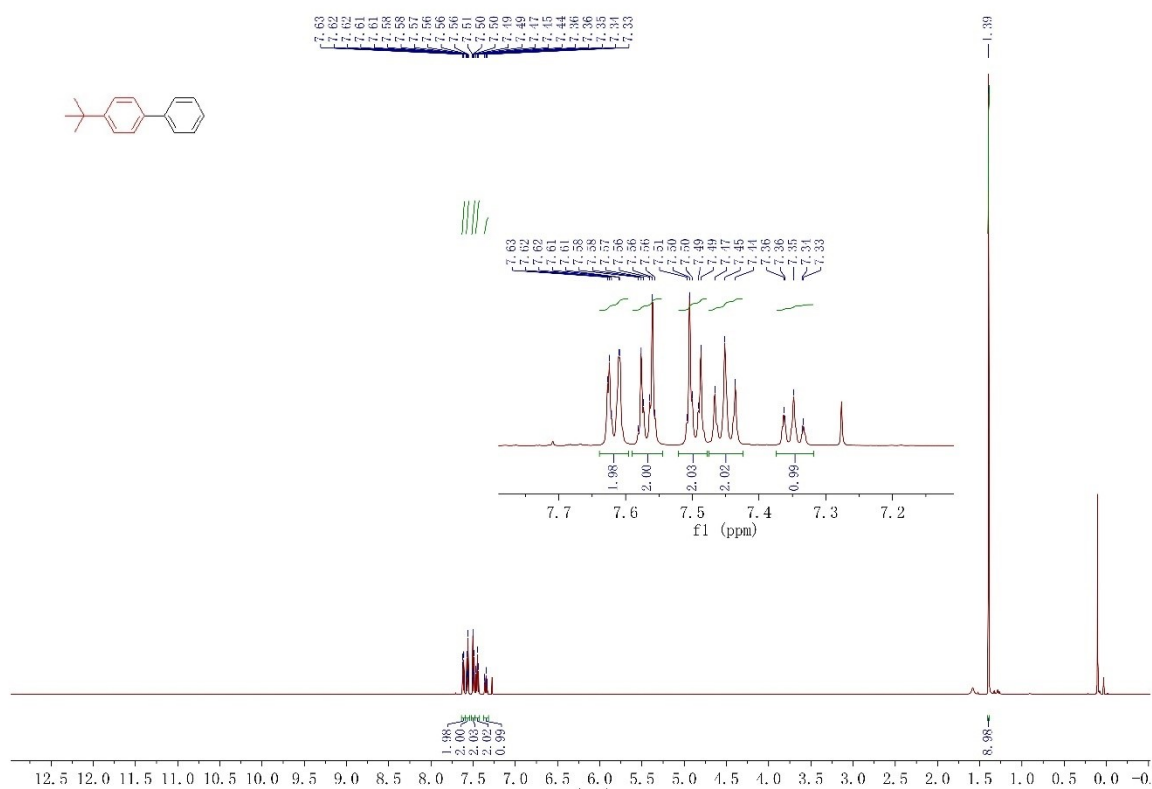

### <sup>13</sup>C NMR (126 MHz, CDCl<sub>3</sub>)

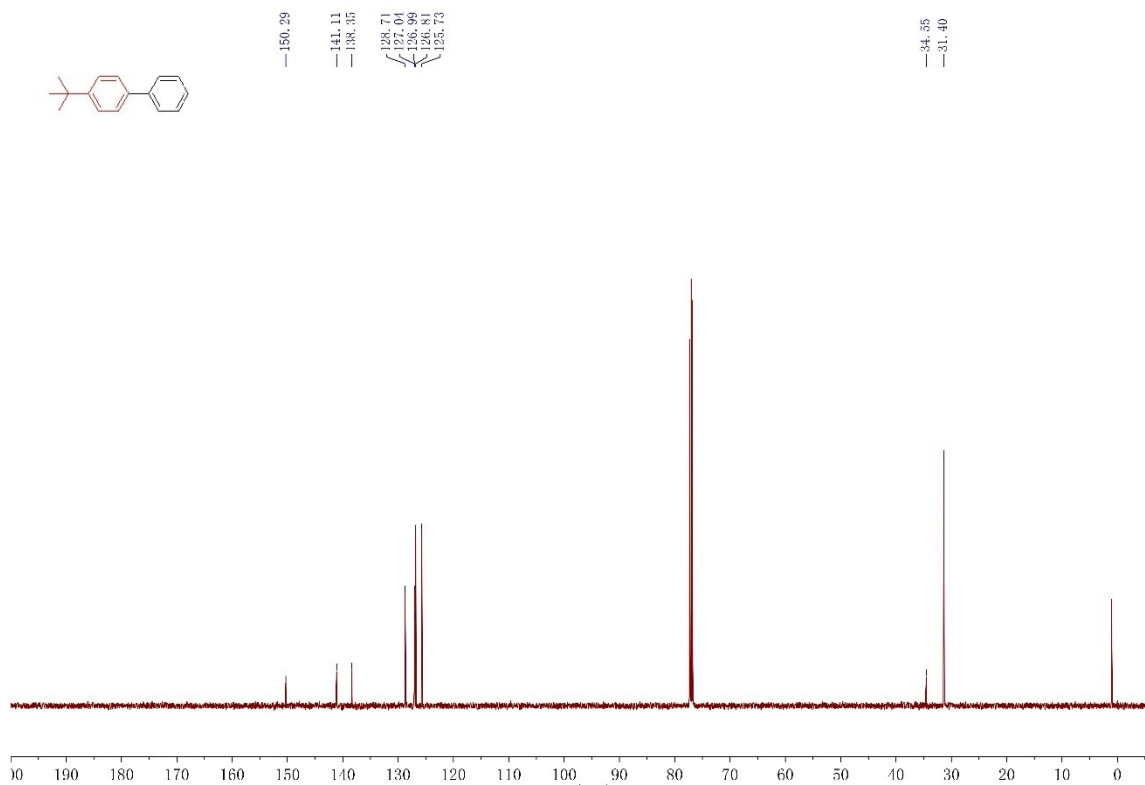

# $^1\text{H}$ NMR (500 MHz, $\text{CDCl}_3$ )

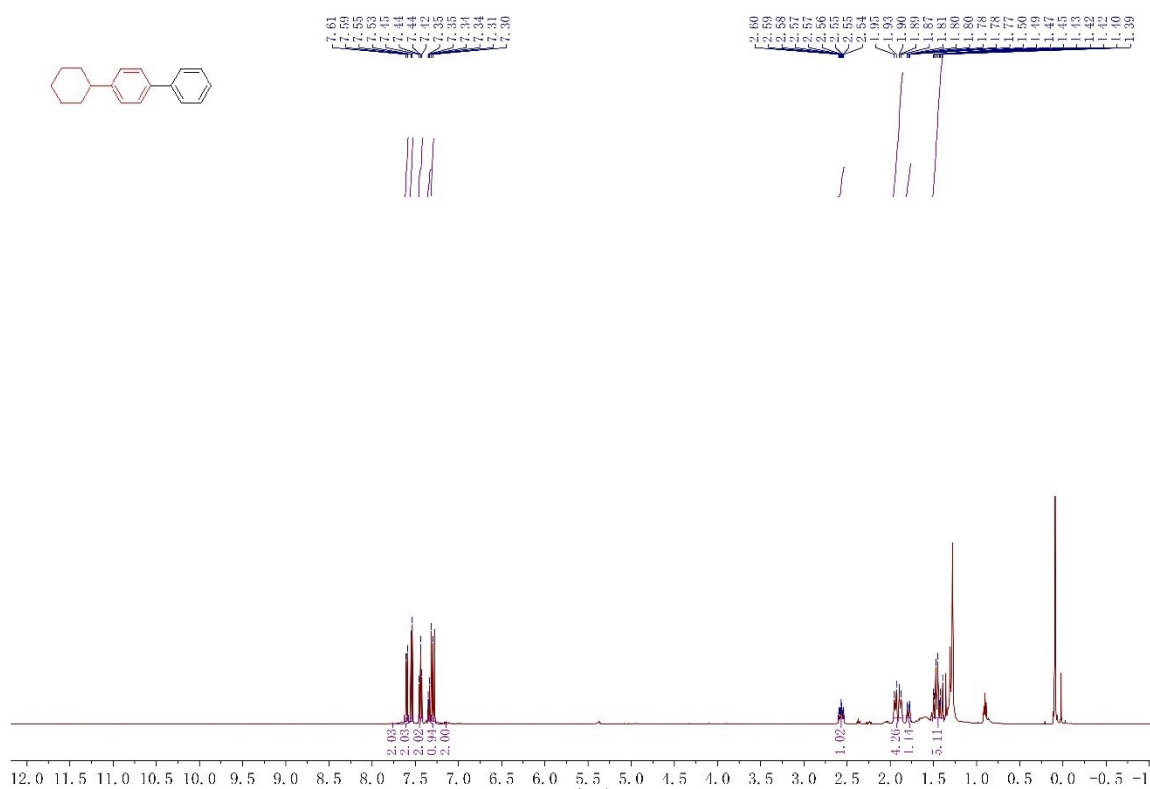

# $^{13}\text{C}$ NMR (126 MHz, $\text{CDCl}_3$ )

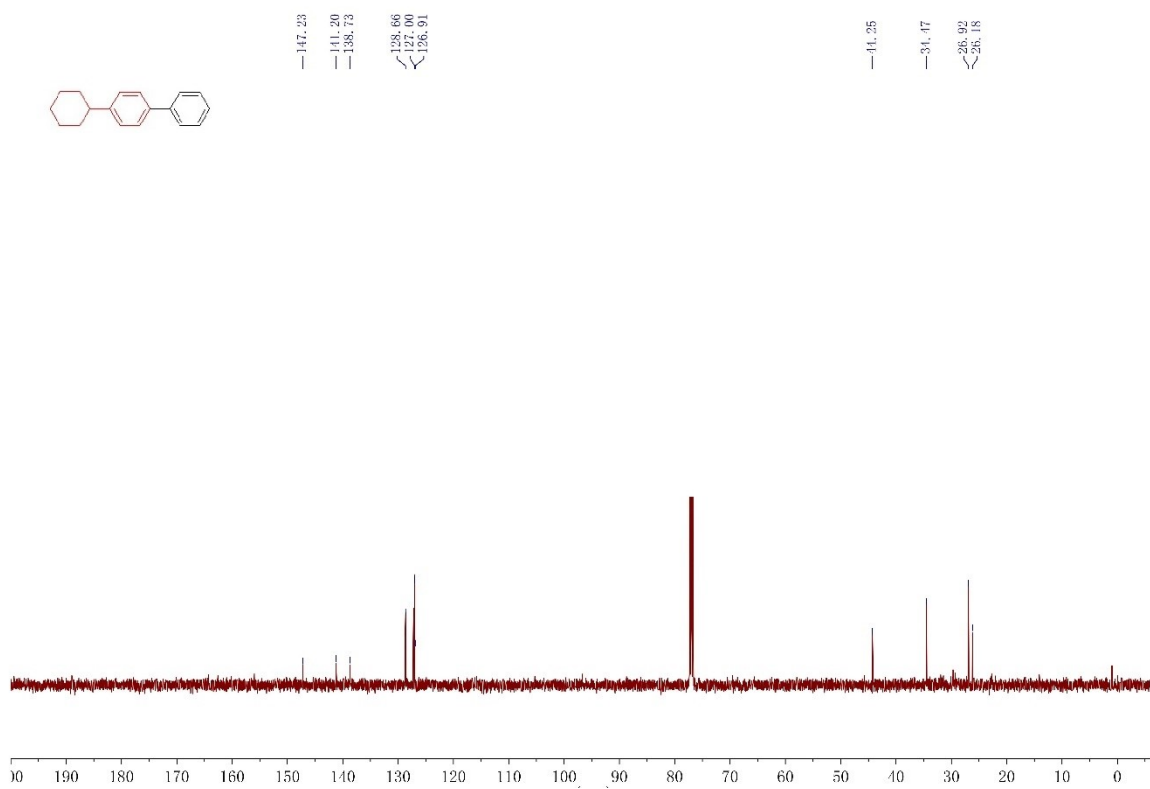



# <sup>1</sup>H NMR (500 MHz, CDCl<sub>3</sub>)

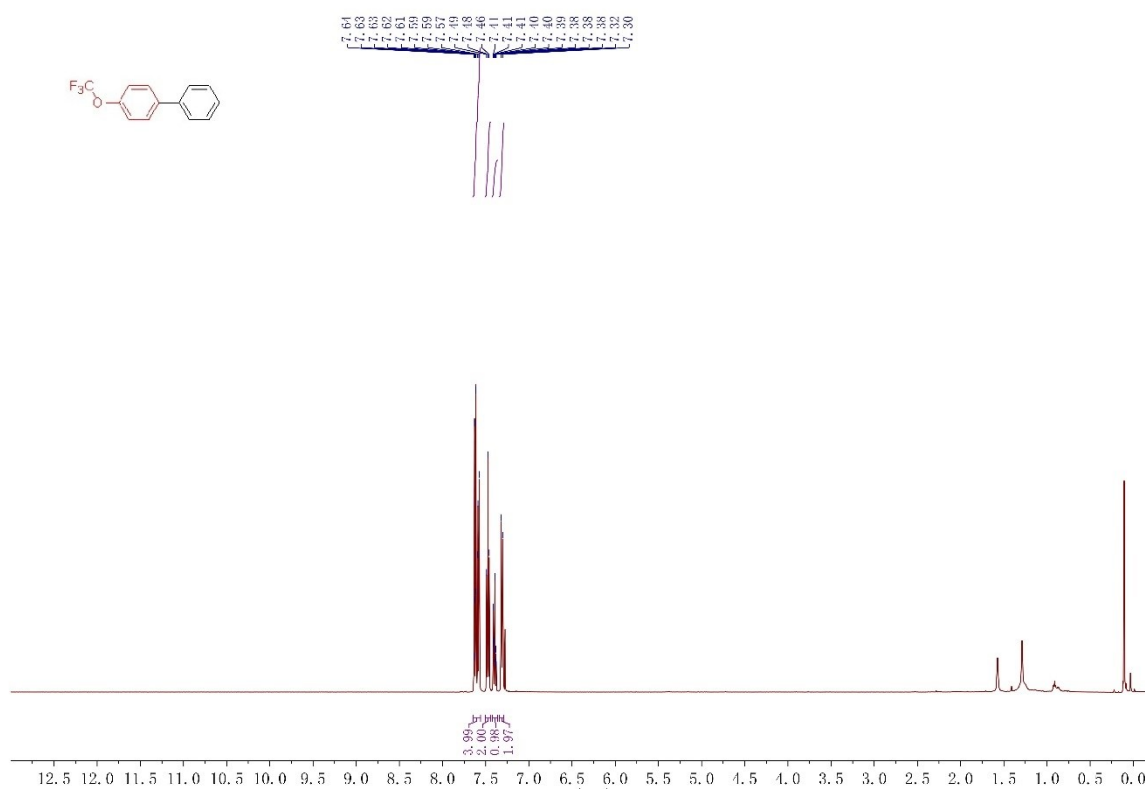

# <sup>13</sup>C NMR (126 MHz, CDCl<sub>3</sub>)

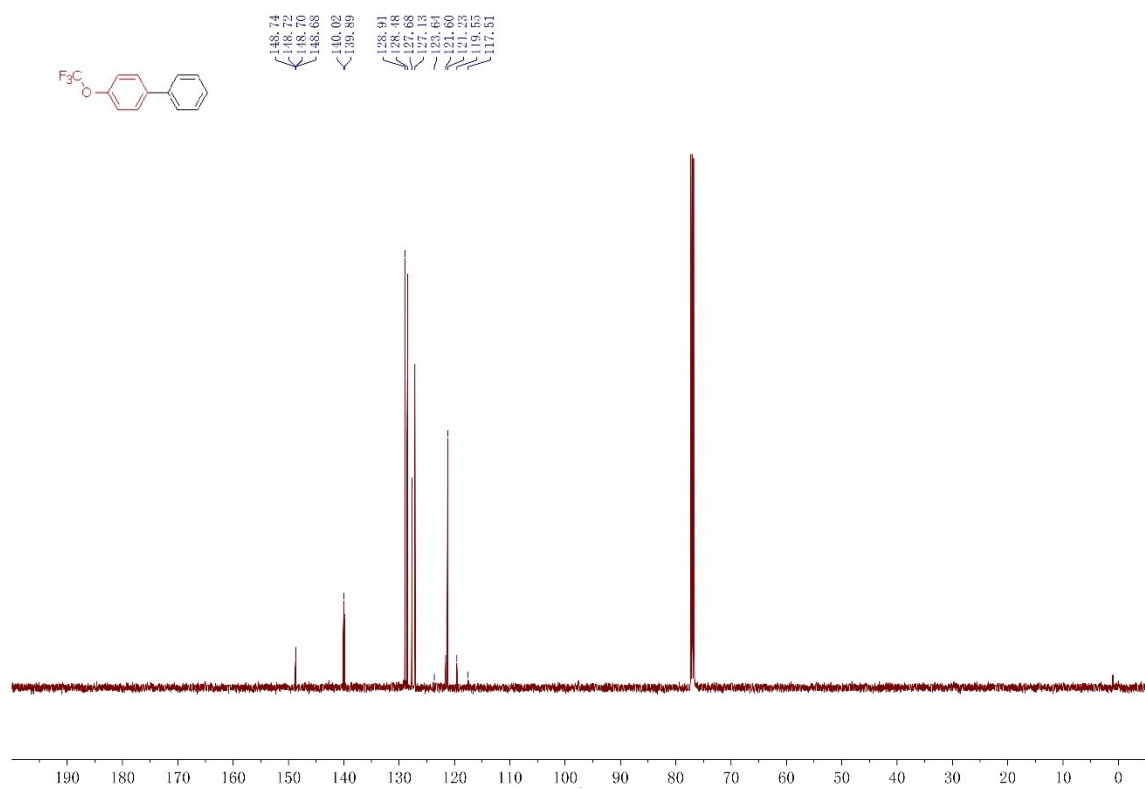

**<sup>19</sup>F NMR (565 MHz, CDCl<sub>3</sub>)**

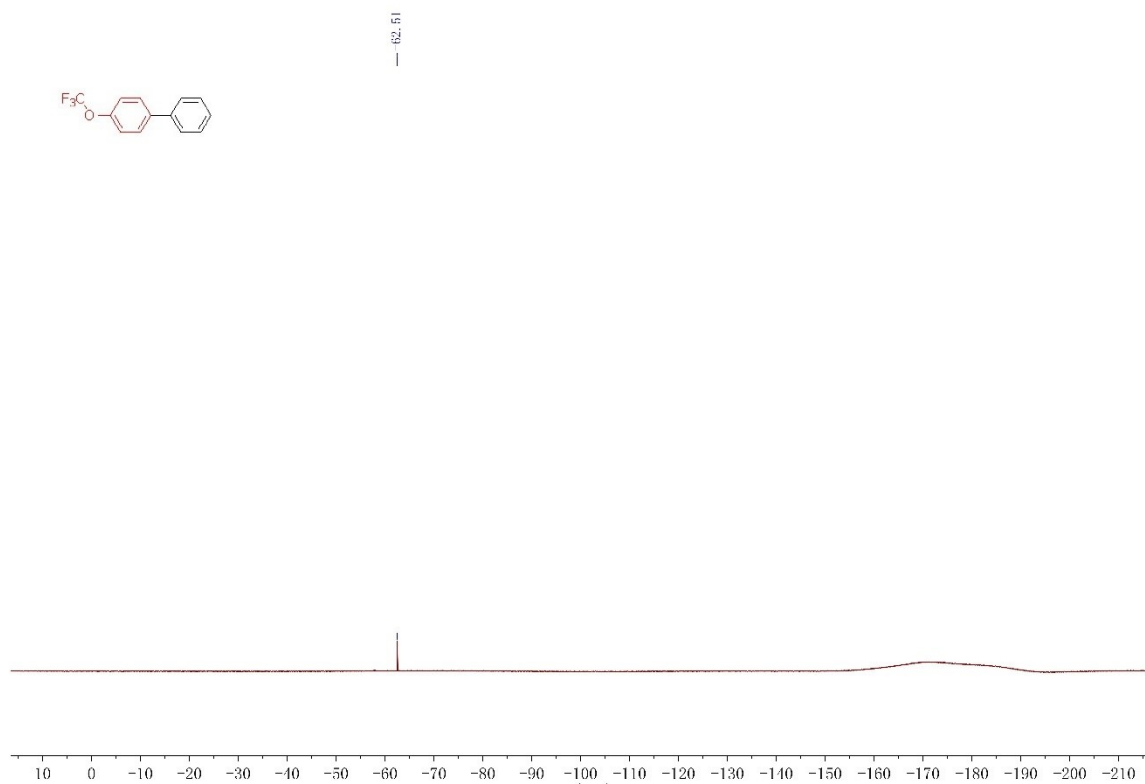

**<sup>1</sup>H NMR (500 MHz, CDCl<sub>3</sub>)**

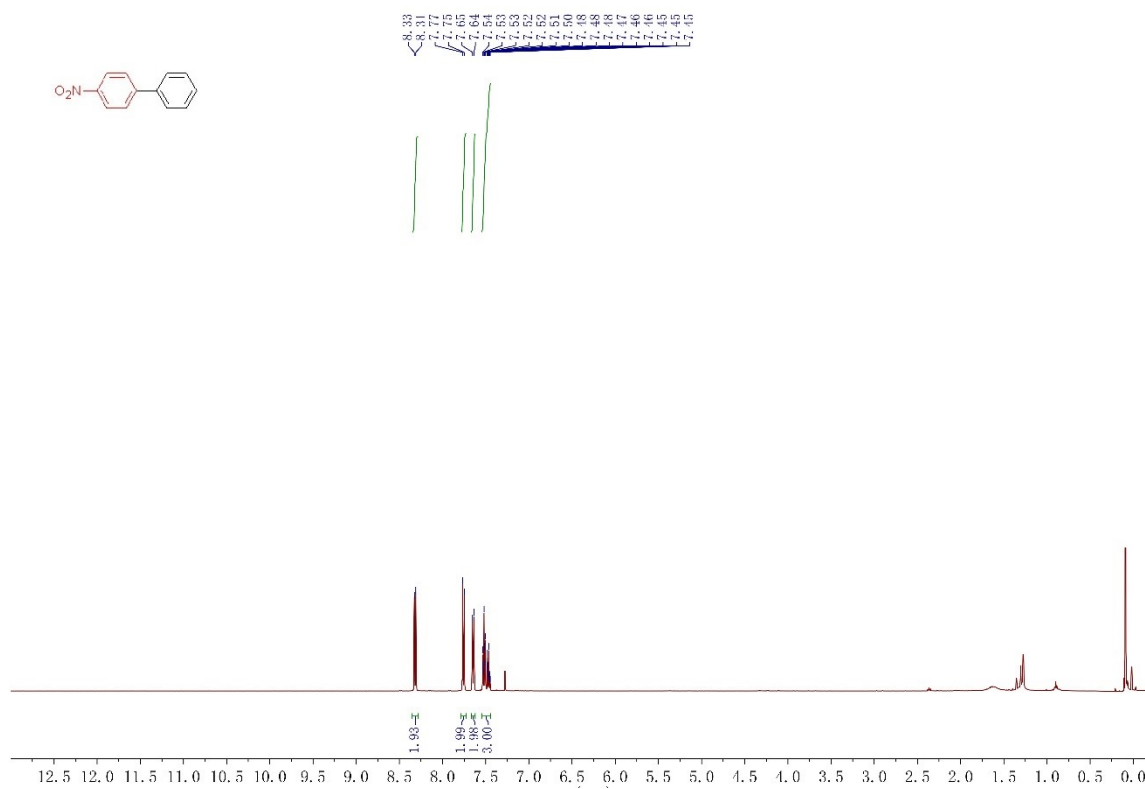

### $^{13}\text{C}$ NMR (126 MHz, $\text{CDCl}_3$ )

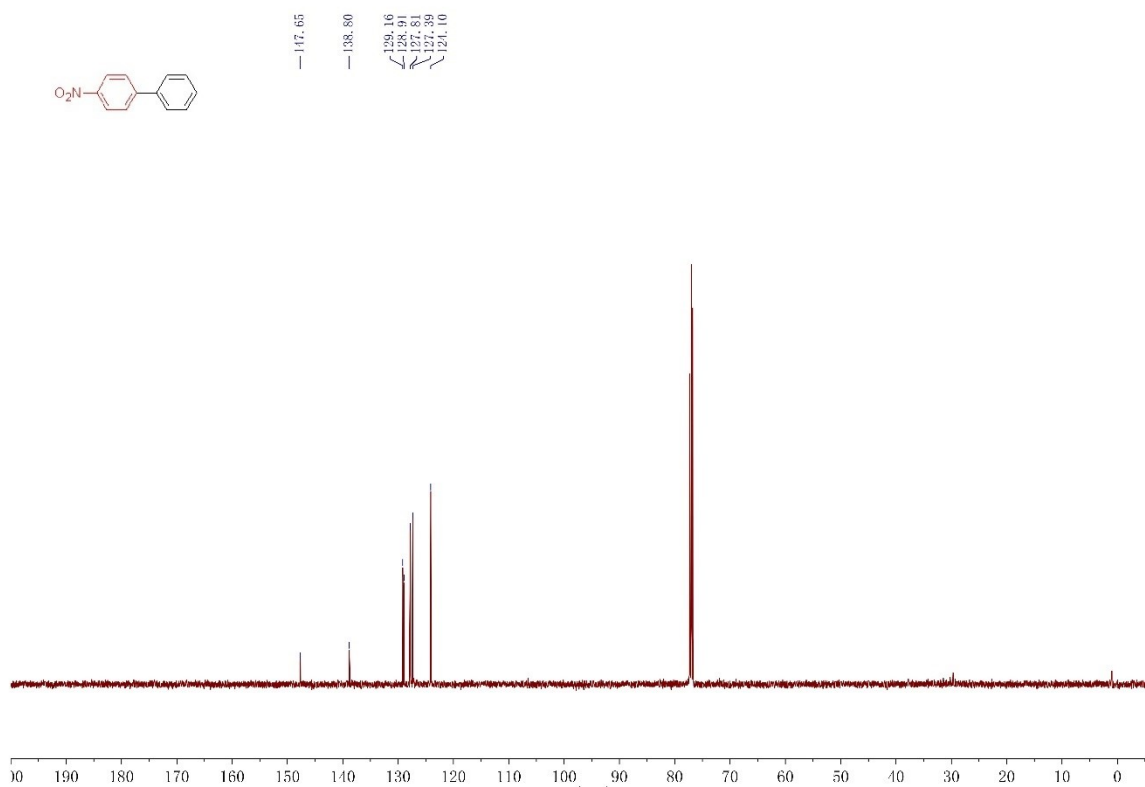

### $^1\text{H}$ NMR (500 MHz, $\text{CDCl}_3$ )

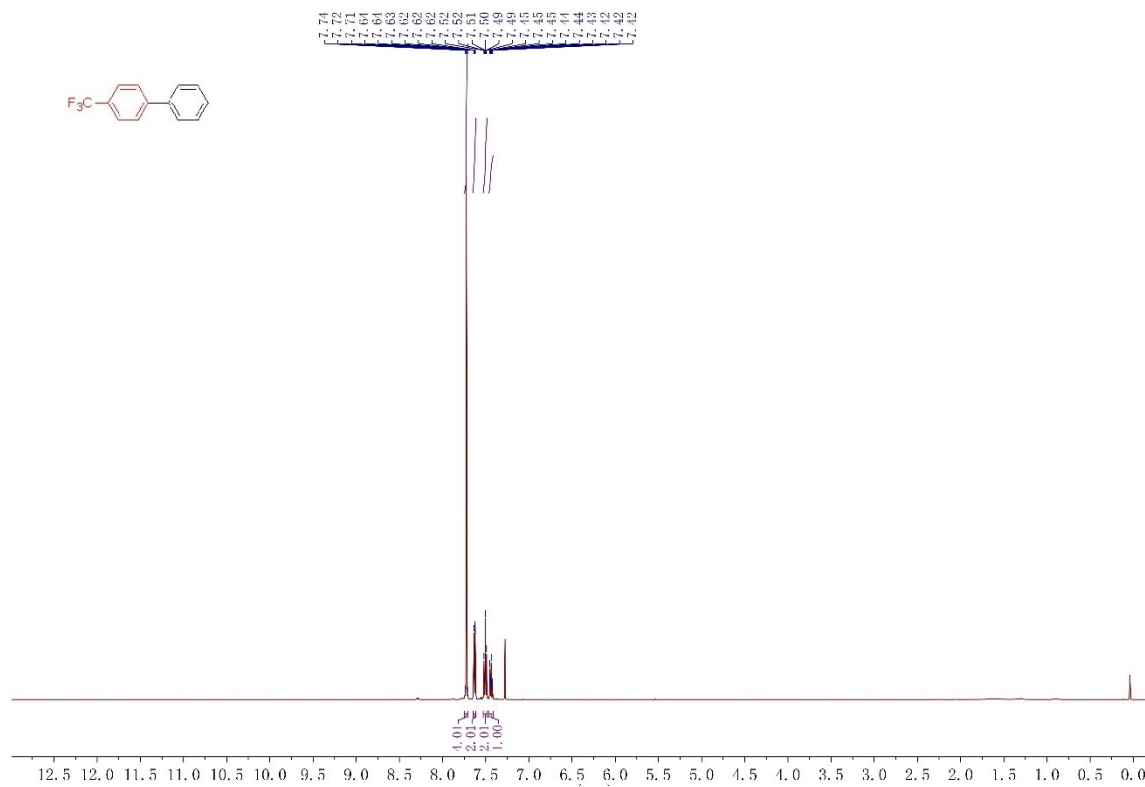

**<sup>13</sup>C NMR (126 MHz, CDCl<sub>3</sub>)**

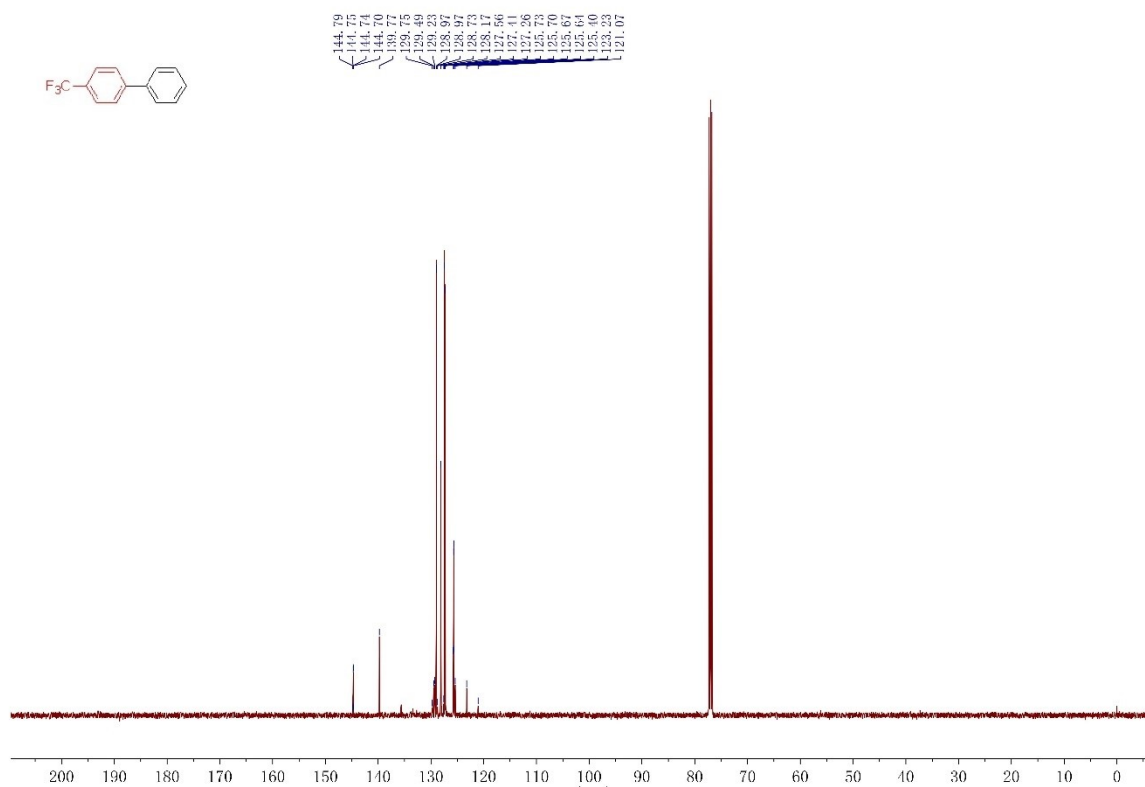

**<sup>19</sup>F NMR (565 MHz, CDCl<sub>3</sub>)**

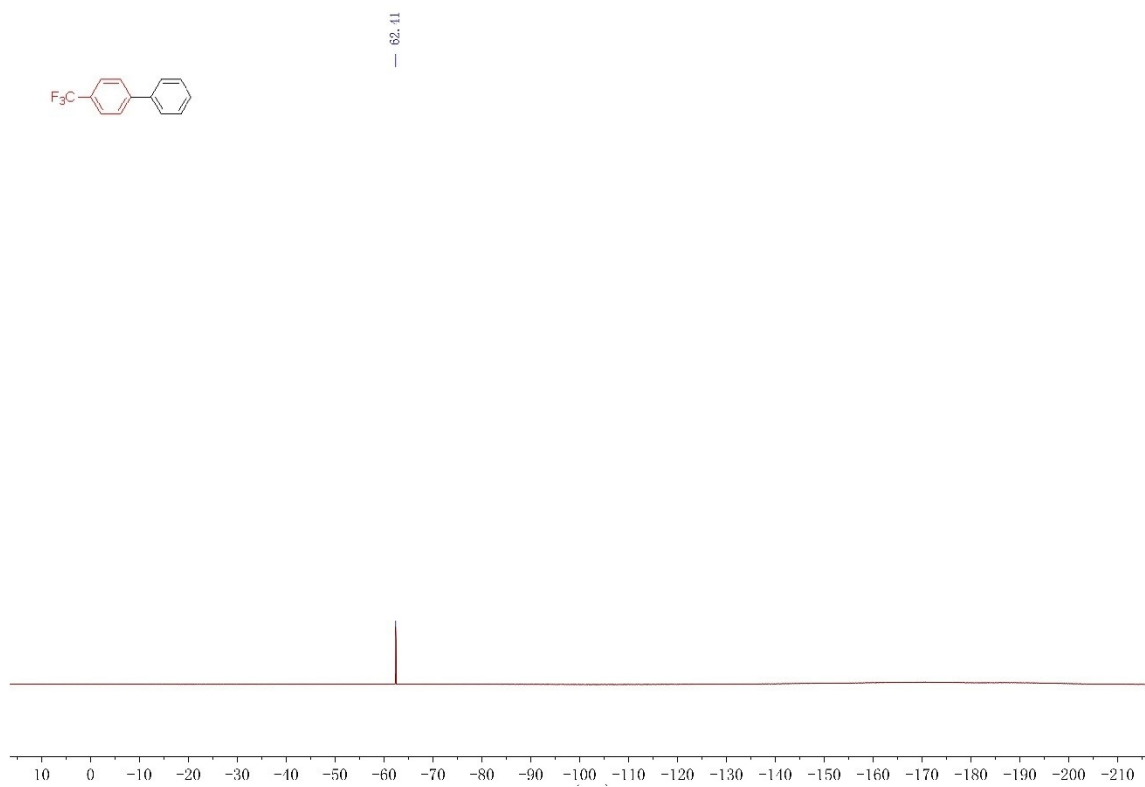

### $^1\text{H}$ NMR (500 MHz, $\text{CDCl}_3$ )

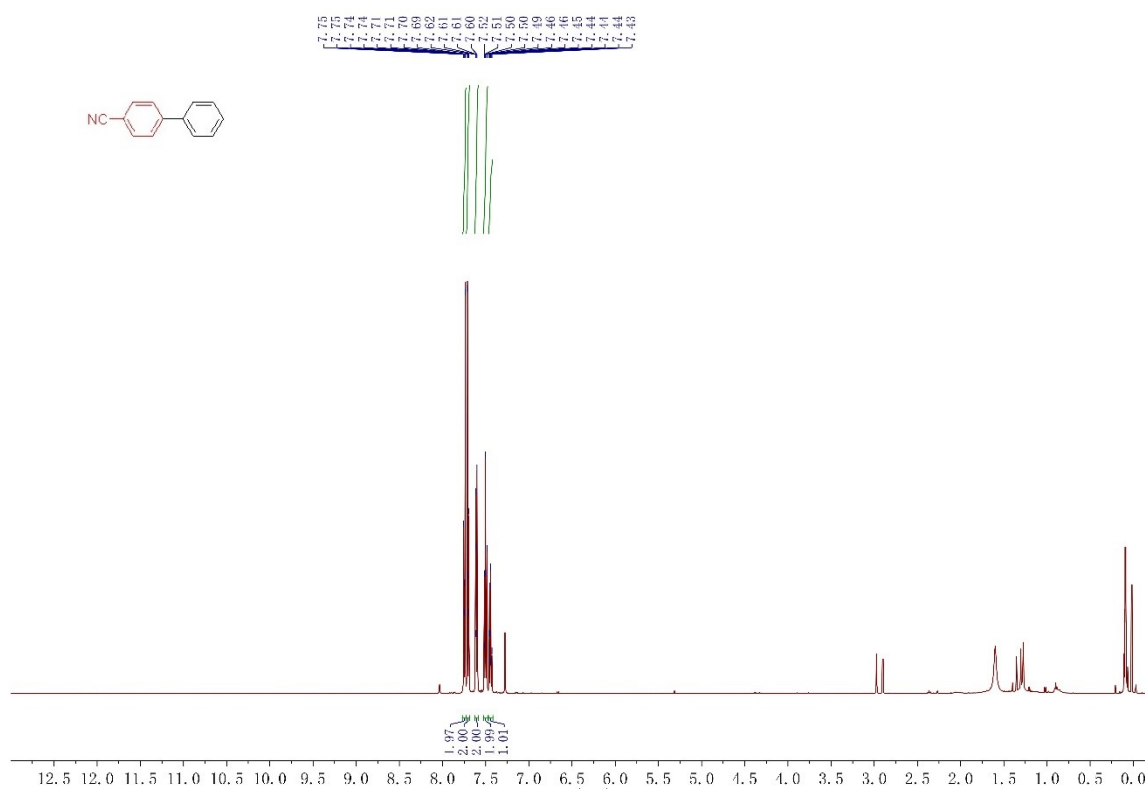

### $^{13}\text{C}$ NMR (126 MHz, $\text{CDCl}_3$ )

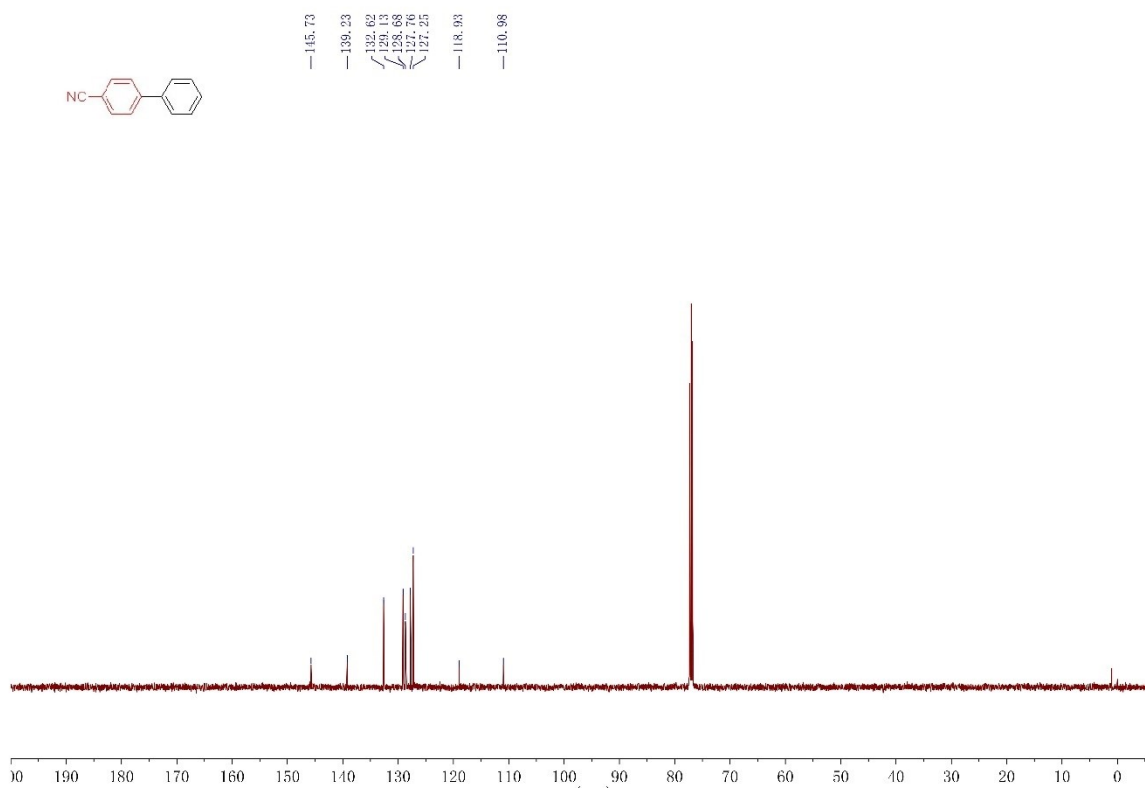

# <sup>1</sup>H NMR (500 MHz, CDCl<sub>3</sub>)

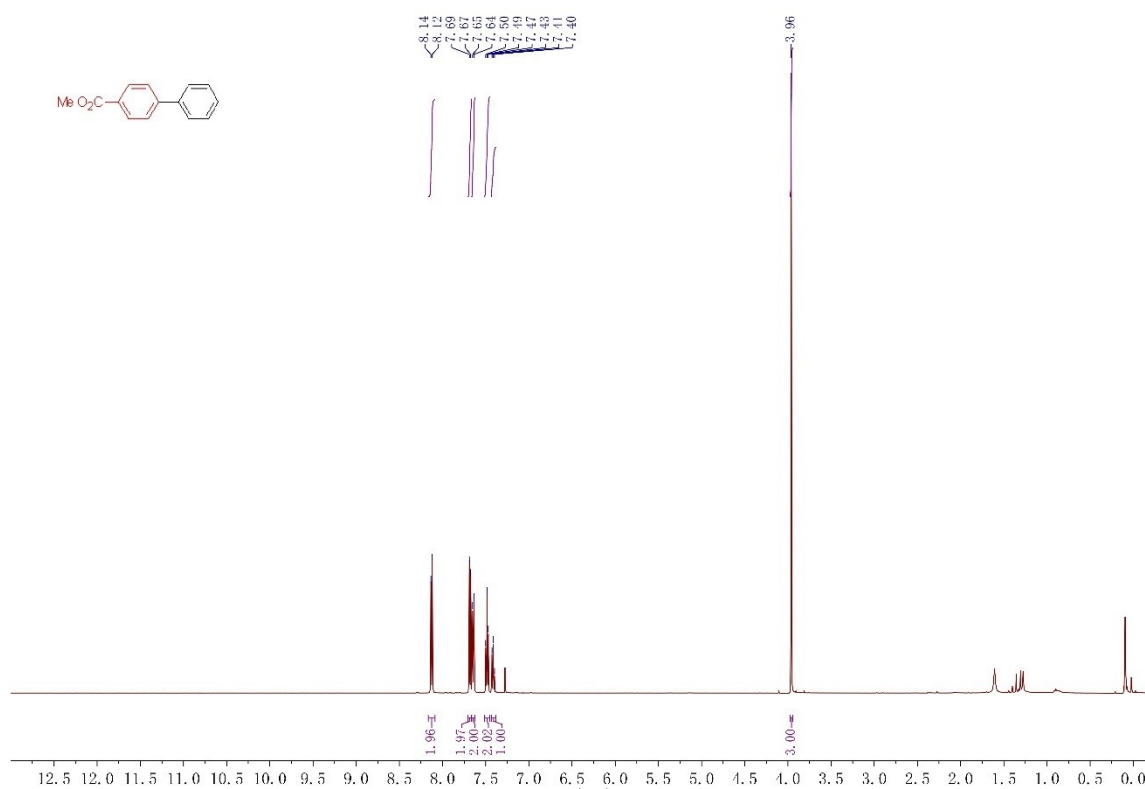

# <sup>13</sup>C NMR (126 MHz, CDCl<sub>3</sub>)

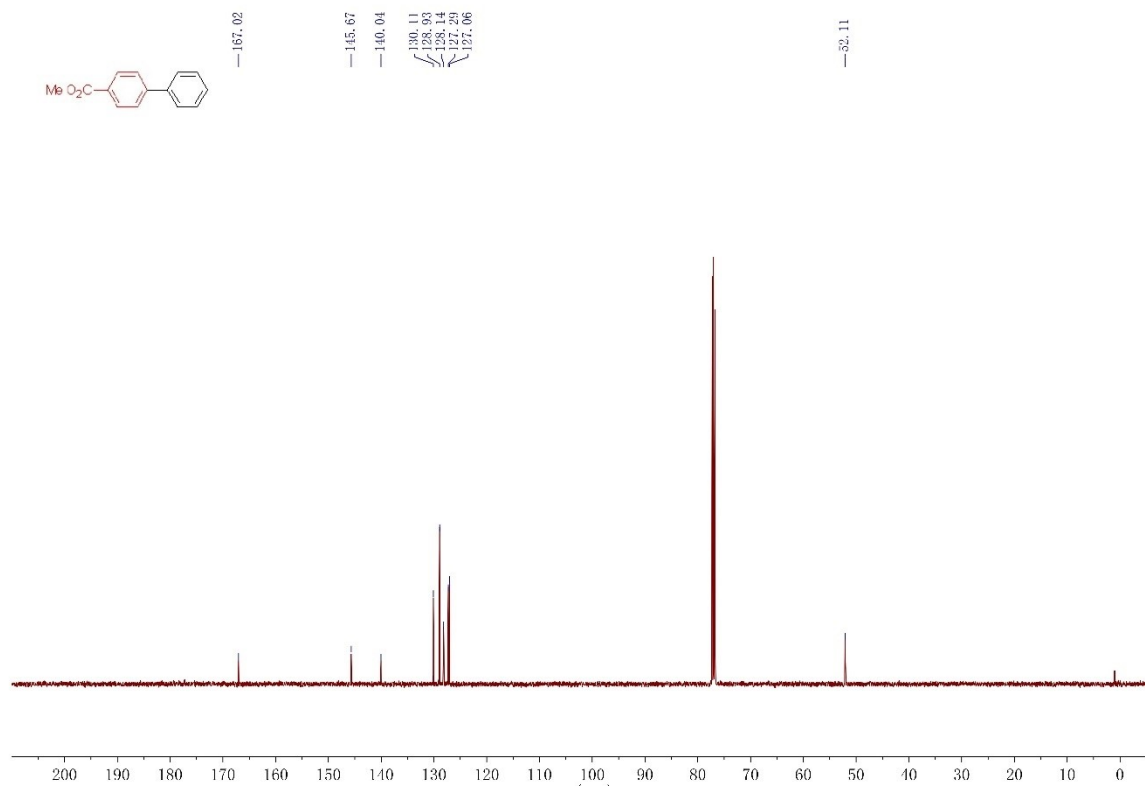

**<sup>1</sup>H NMR (500 MHz, CDCl<sub>3</sub>)**

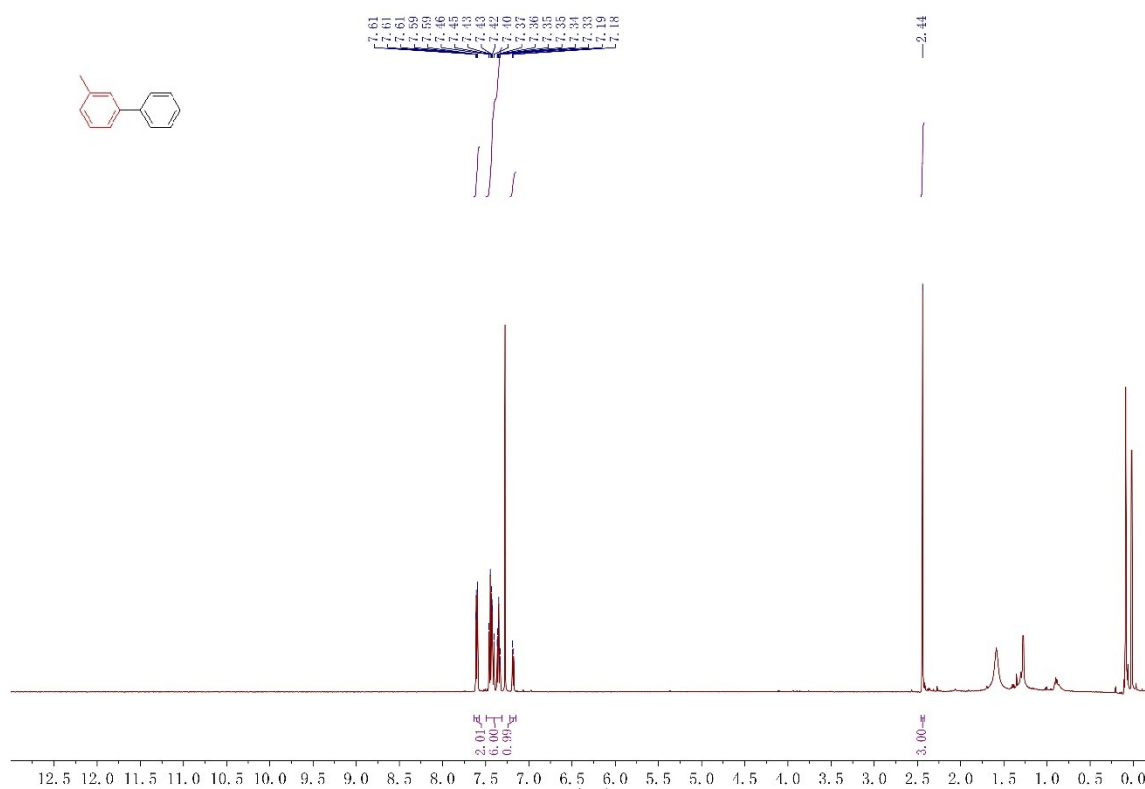

**<sup>13</sup>C NMR (126 MHz, CDCl<sub>3</sub>)**

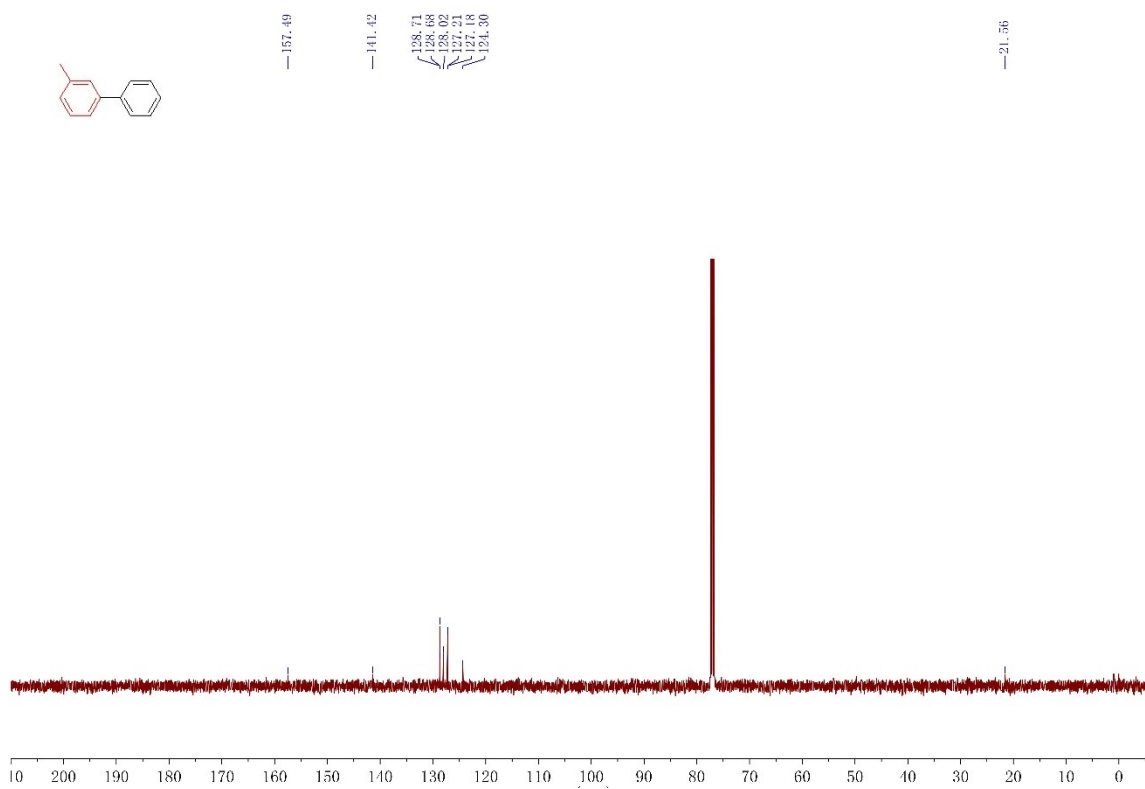

# <sup>1</sup>H NMR (500 MHz, CDCl<sub>3</sub>)

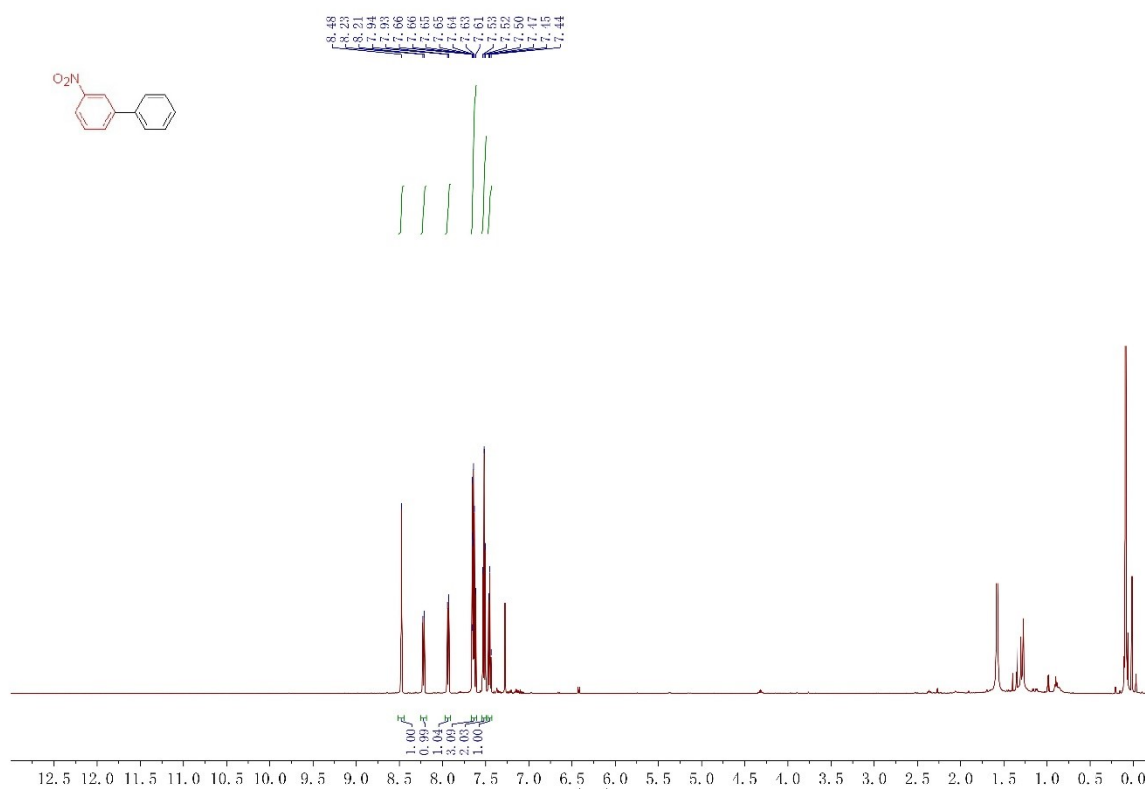

# <sup>13</sup>C NMR (126 MHz, CDCl<sub>3</sub>)

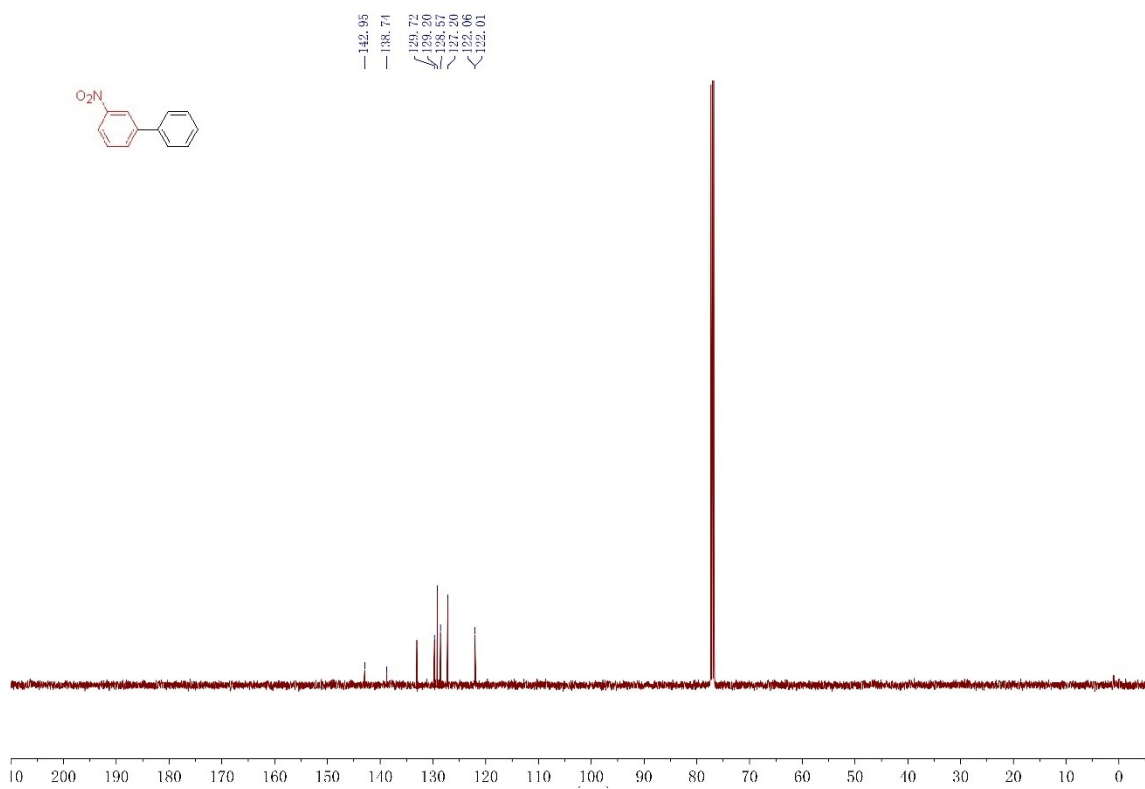



<sup>1</sup>H NMR (500 MHz, CDCl<sub>3</sub>)

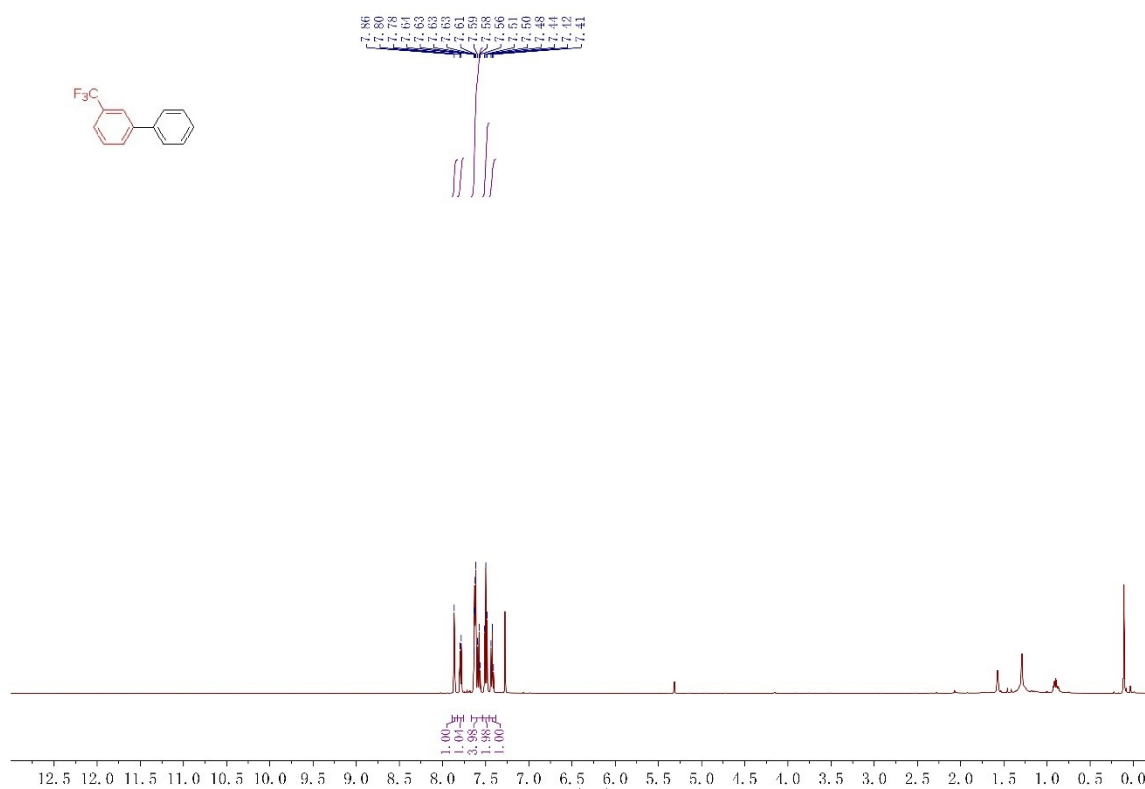

<sup>13</sup>C NMR (126 MHz, CDCl<sub>3</sub>)

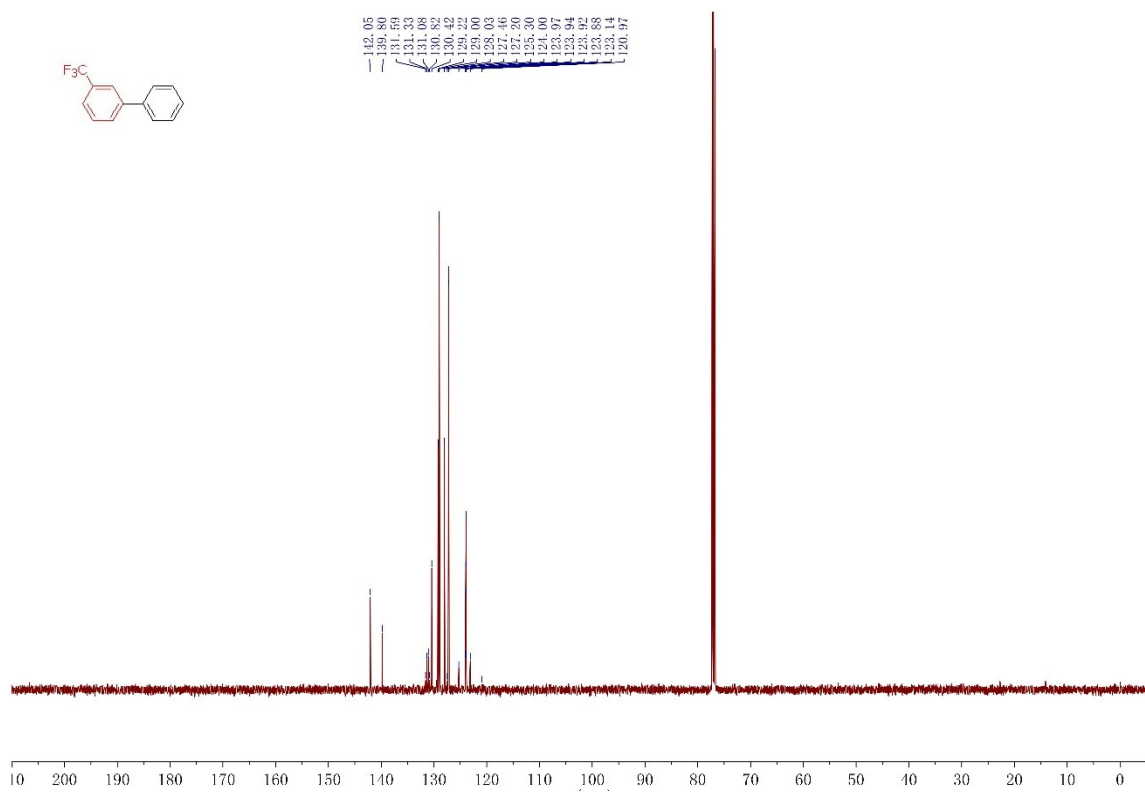

**<sup>19</sup>F NMR (565 MHz, CDCl<sub>3</sub>)**

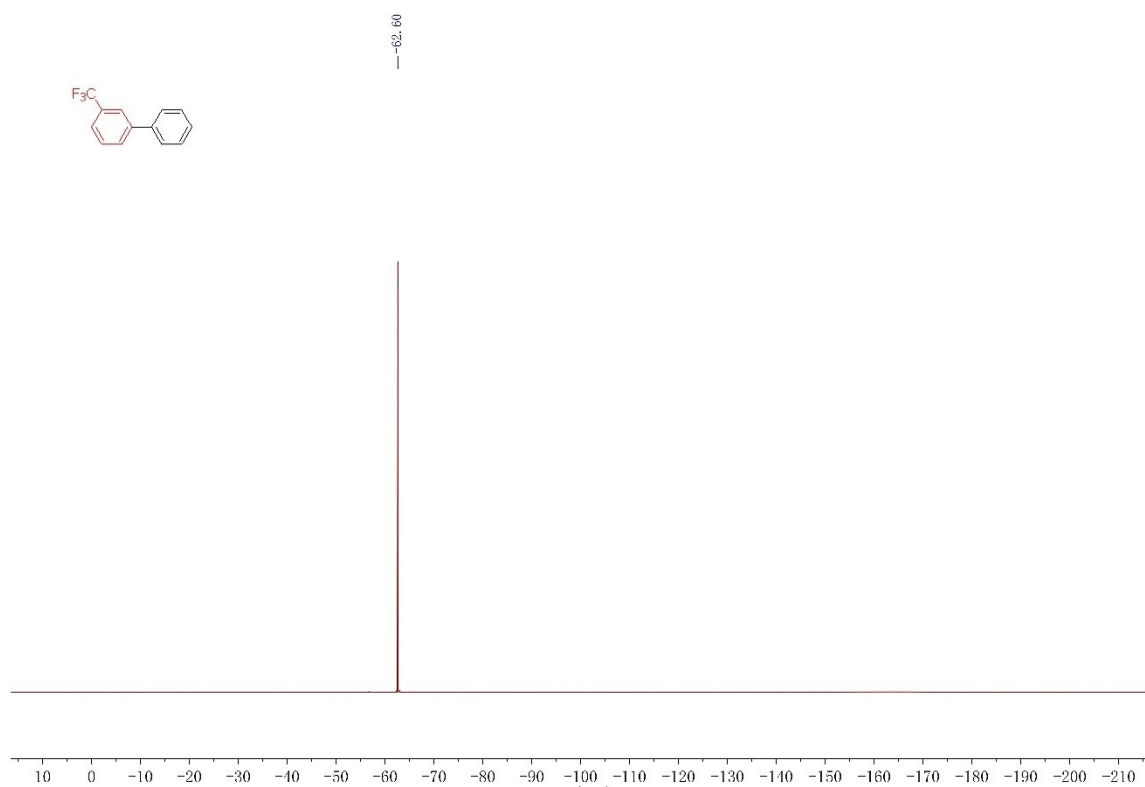

**<sup>1</sup>H NMR (500 MHz, CDCl<sub>3</sub>)**

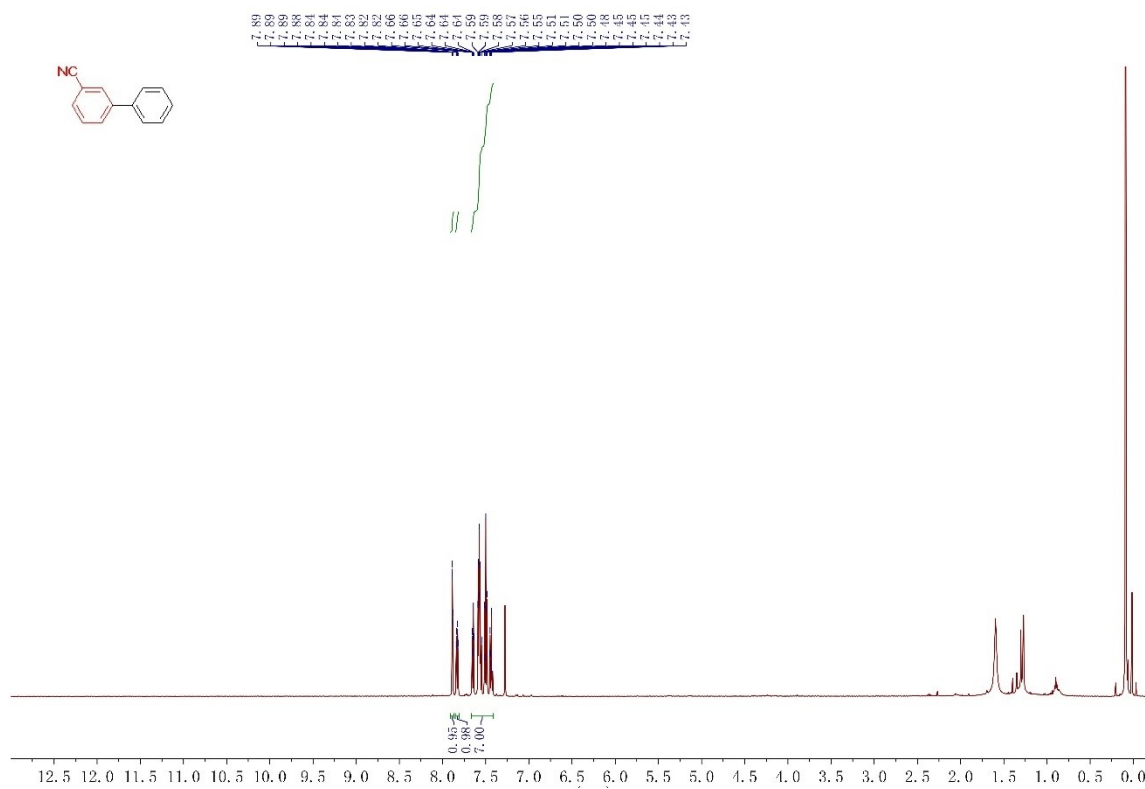

<sup>13</sup>C NMR (126 MHz, CDCl<sub>3</sub>)

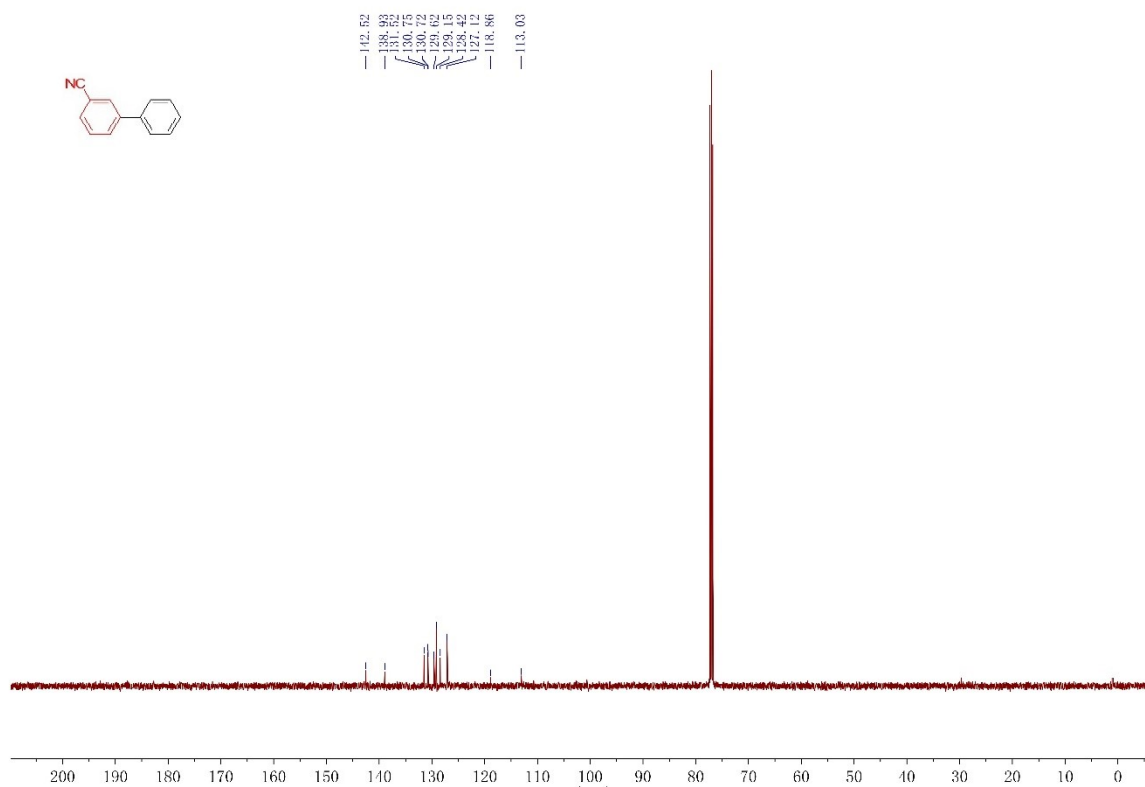

<sup>1</sup>H NMR (500 MHz, CDCl<sub>3</sub>)

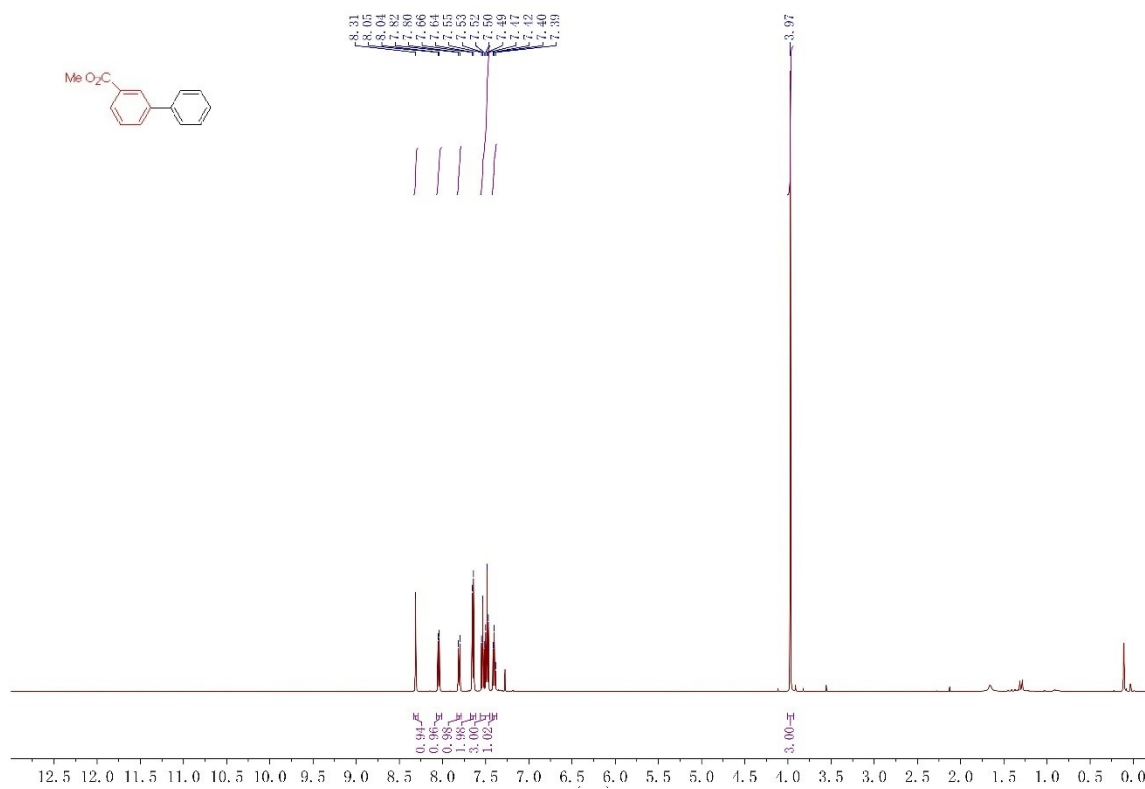

### $^{13}\text{C}$ NMR (126 MHz, $\text{CDCl}_3$ )

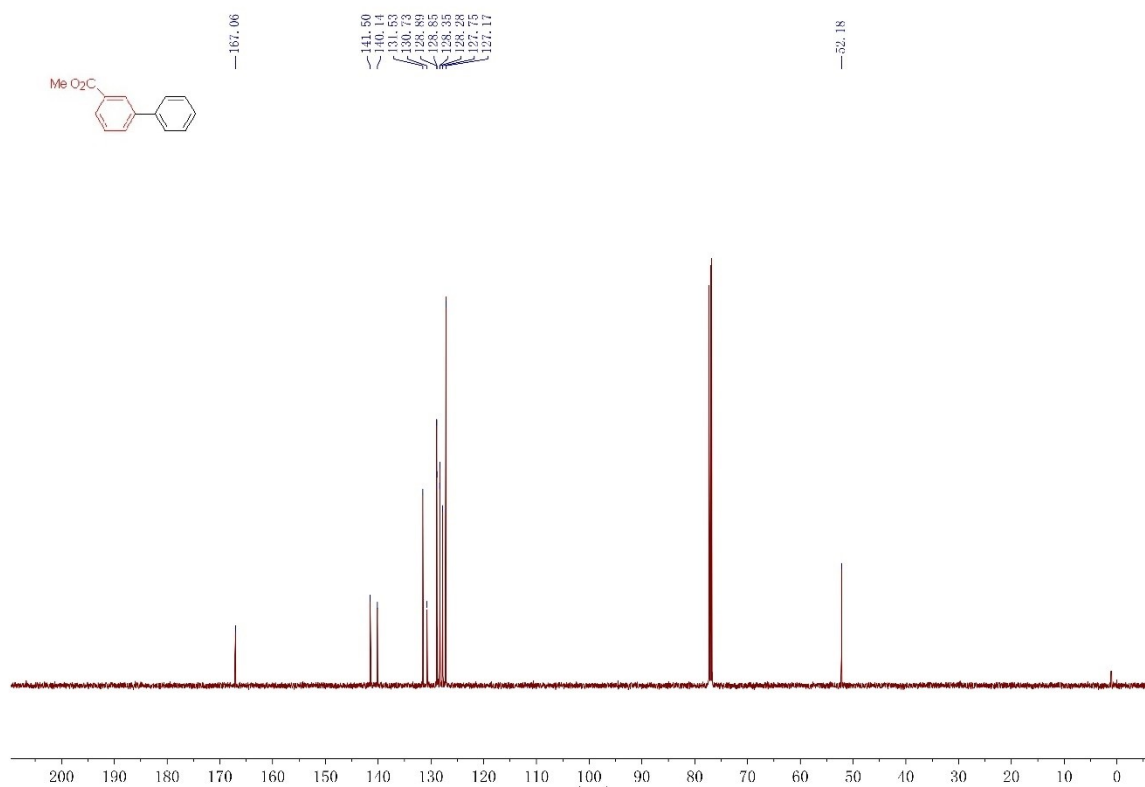

### $^1\text{H}$ NMR (500 MHz, $\text{CDCl}_3$ )

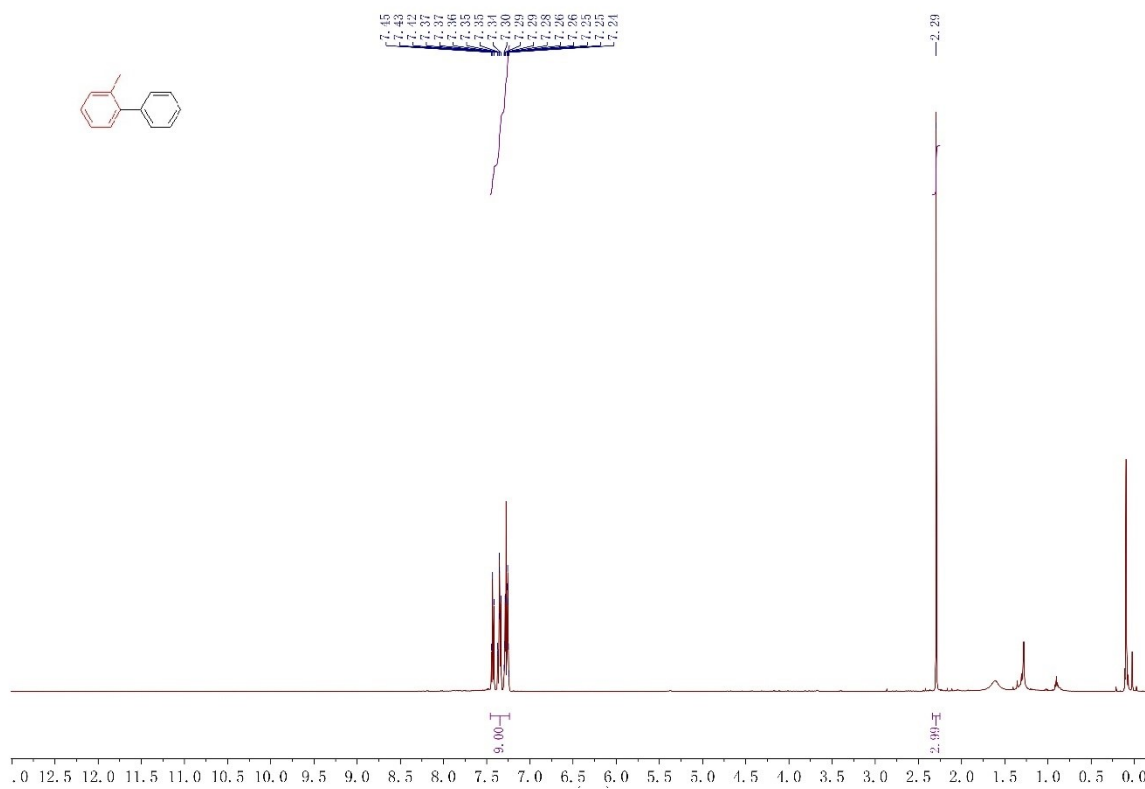

<sup>13</sup>C NMR (126 MHz, CDCl<sub>3</sub>)

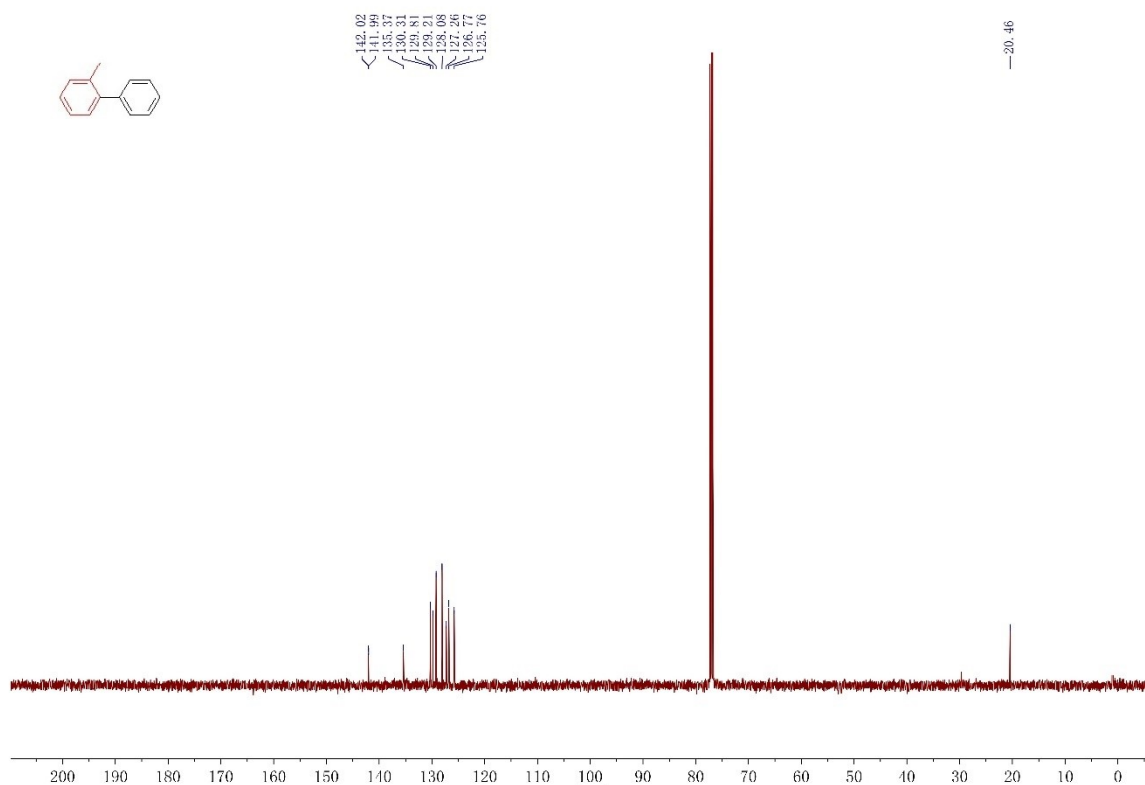

<sup>1</sup>H NMR (500 MHz, CDCl<sub>3</sub>)

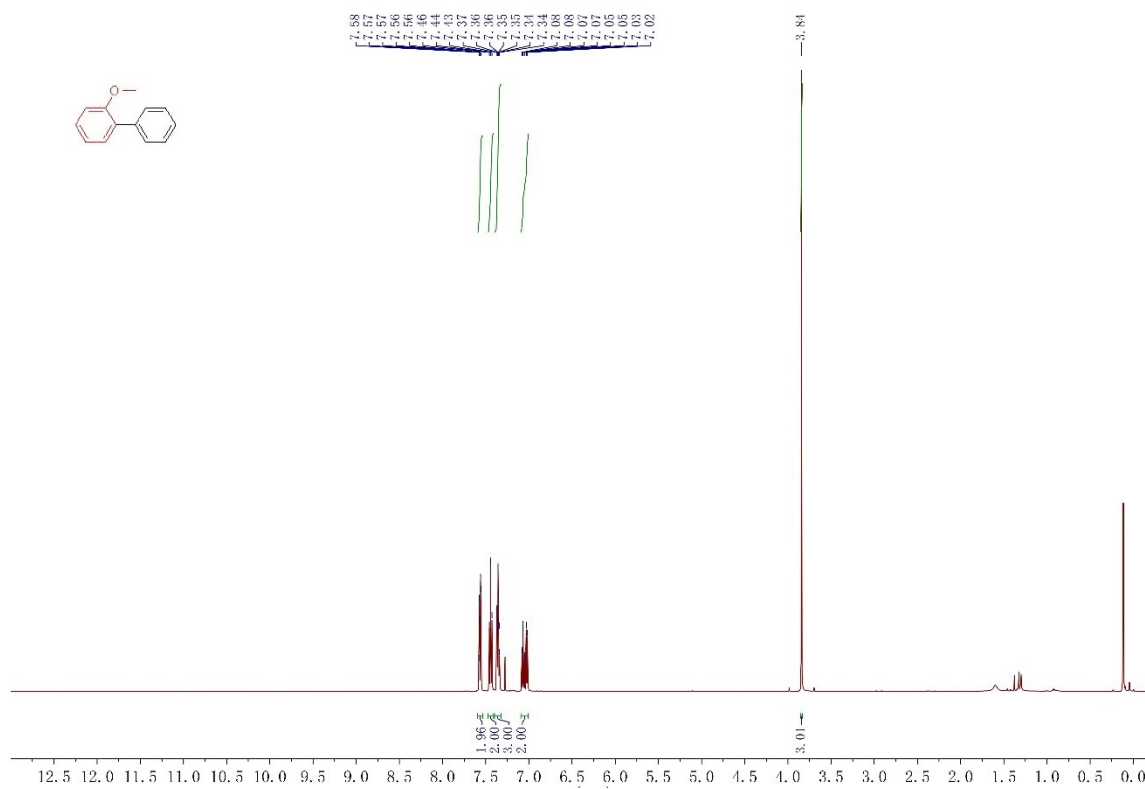

### <sup>13</sup>C NMR (126 MHz, CDCl<sub>3</sub>)

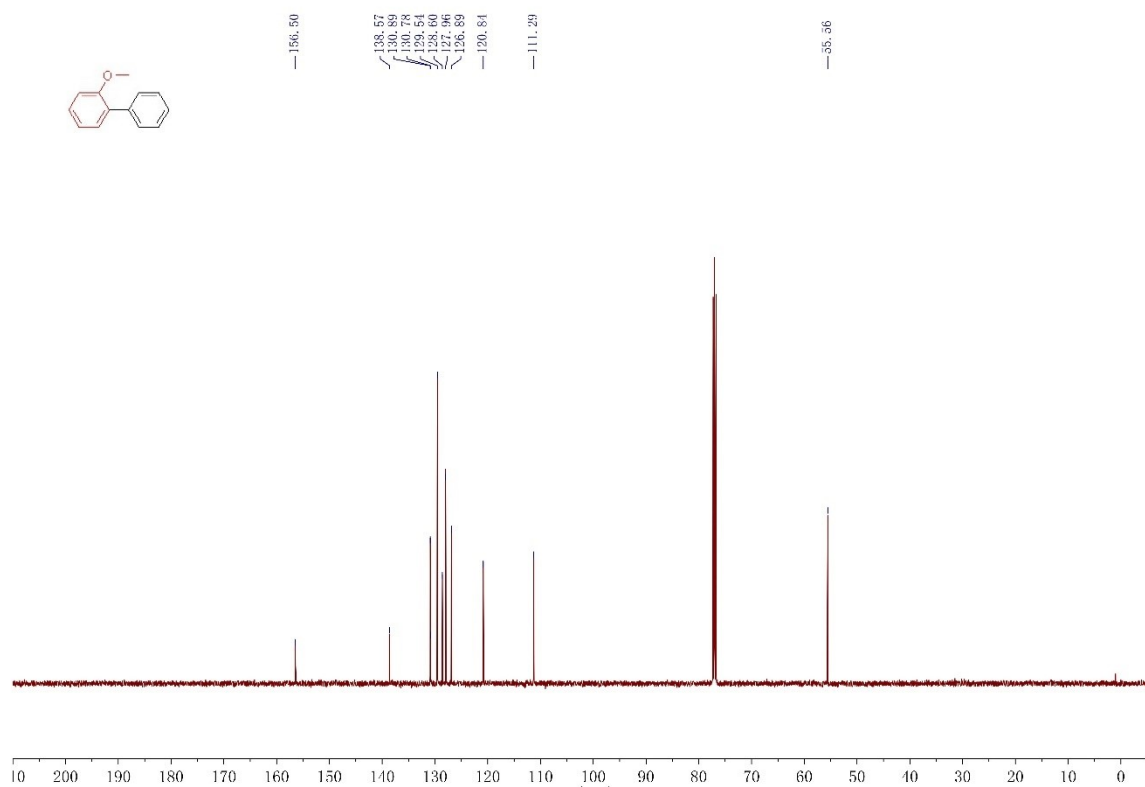

### <sup>1</sup>H NMR (500 MHz, CDCl<sub>3</sub>)

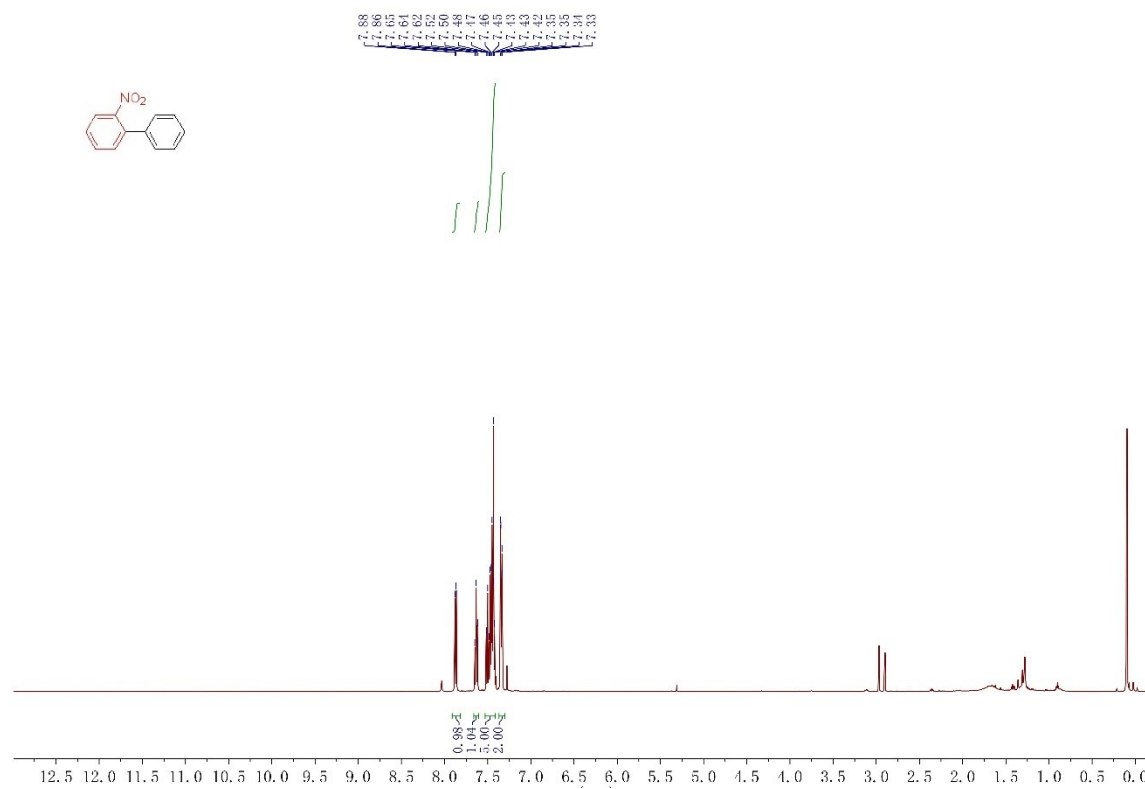

**<sup>13</sup>C NMR (126 MHz, CDCl<sub>3</sub>)**

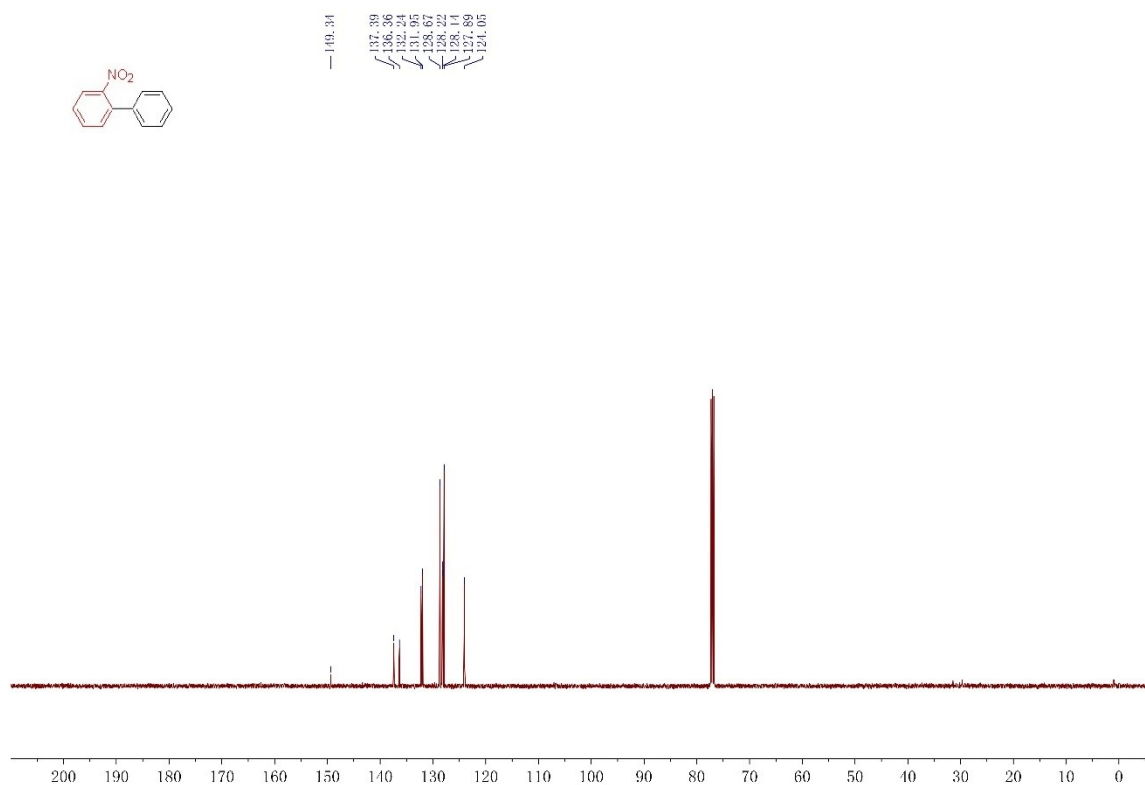

**<sup>1</sup>H NMR (600 MHz, CDCl<sub>3</sub>)**

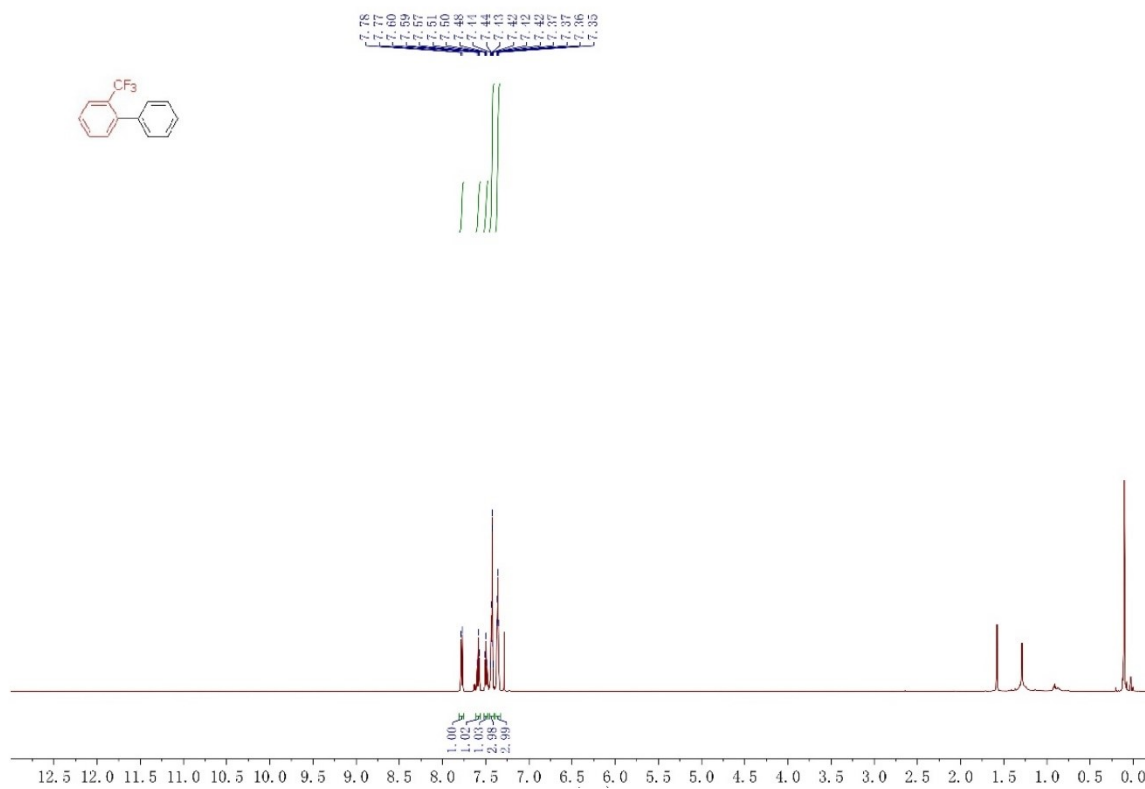

**<sup>13</sup>C NMR (151 MHz, CDCl<sub>3</sub>)**

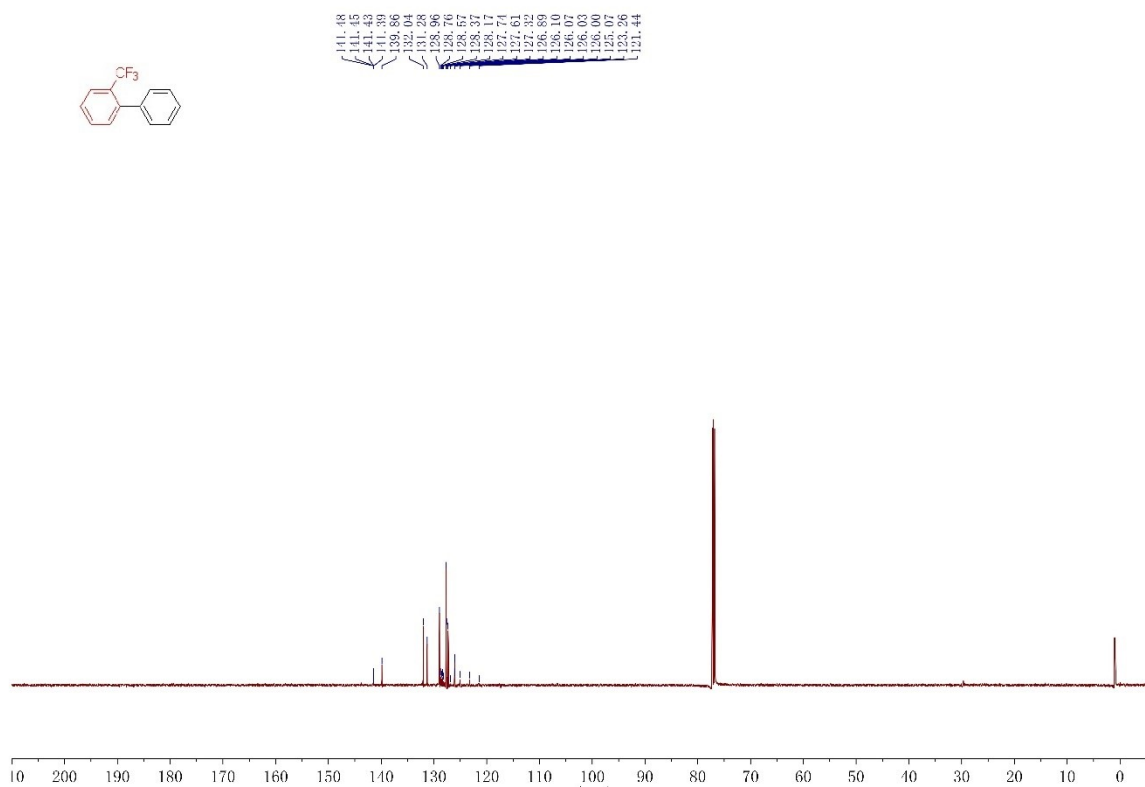

**<sup>19</sup>F NMR (565 MHz, CDCl<sub>3</sub>)**

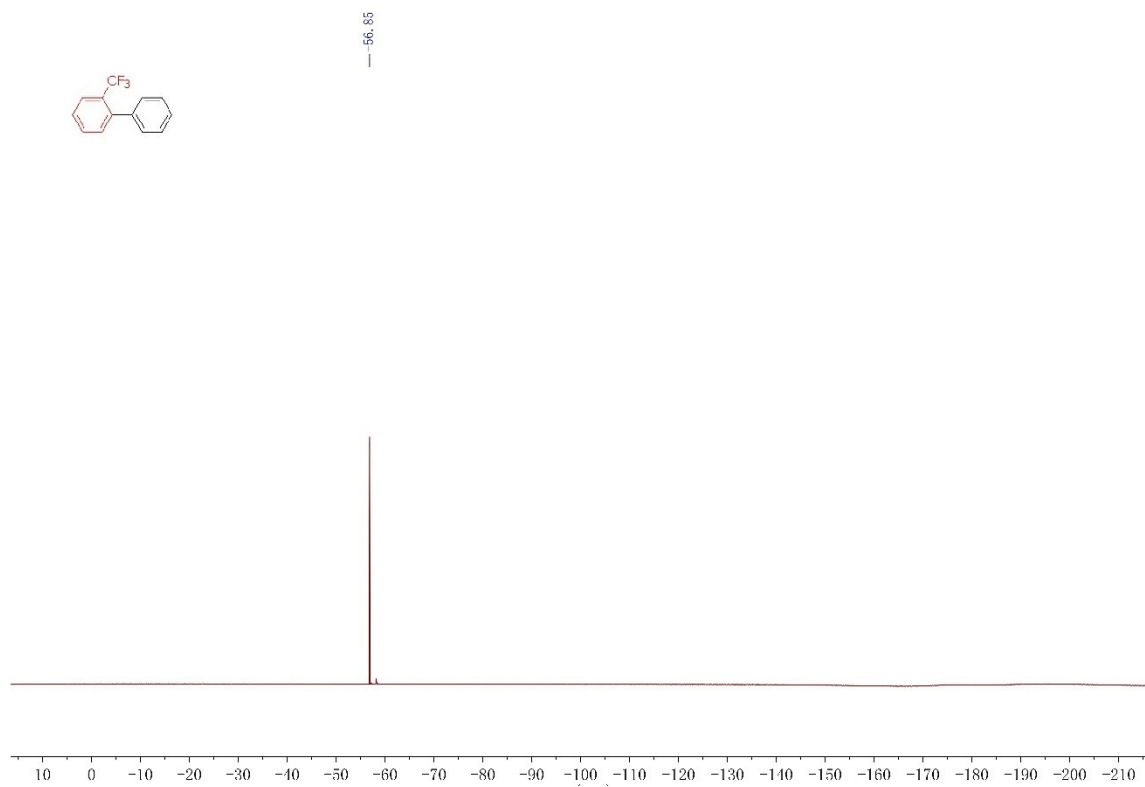



### $^1\text{H}$ NMR (500 MHz, $\text{CDCl}_3$ )

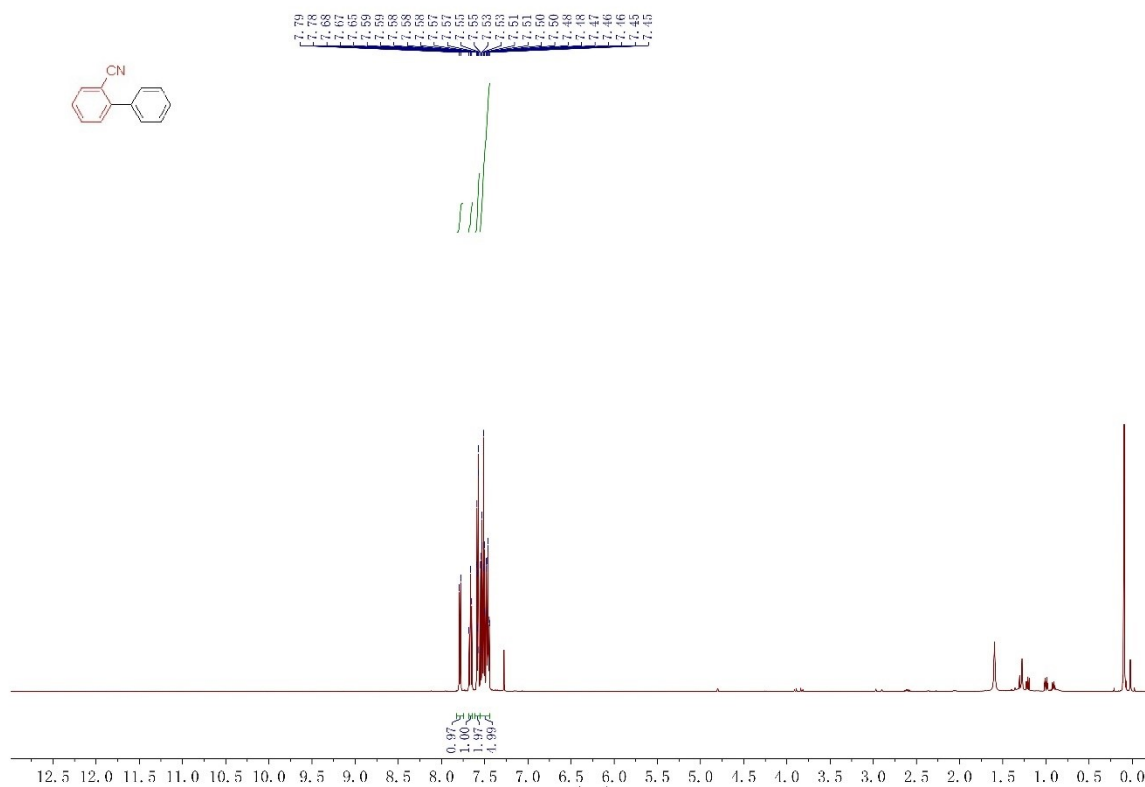

### $^{13}\text{C}$ NMR (126 MHz, $\text{CDCl}_3$ )

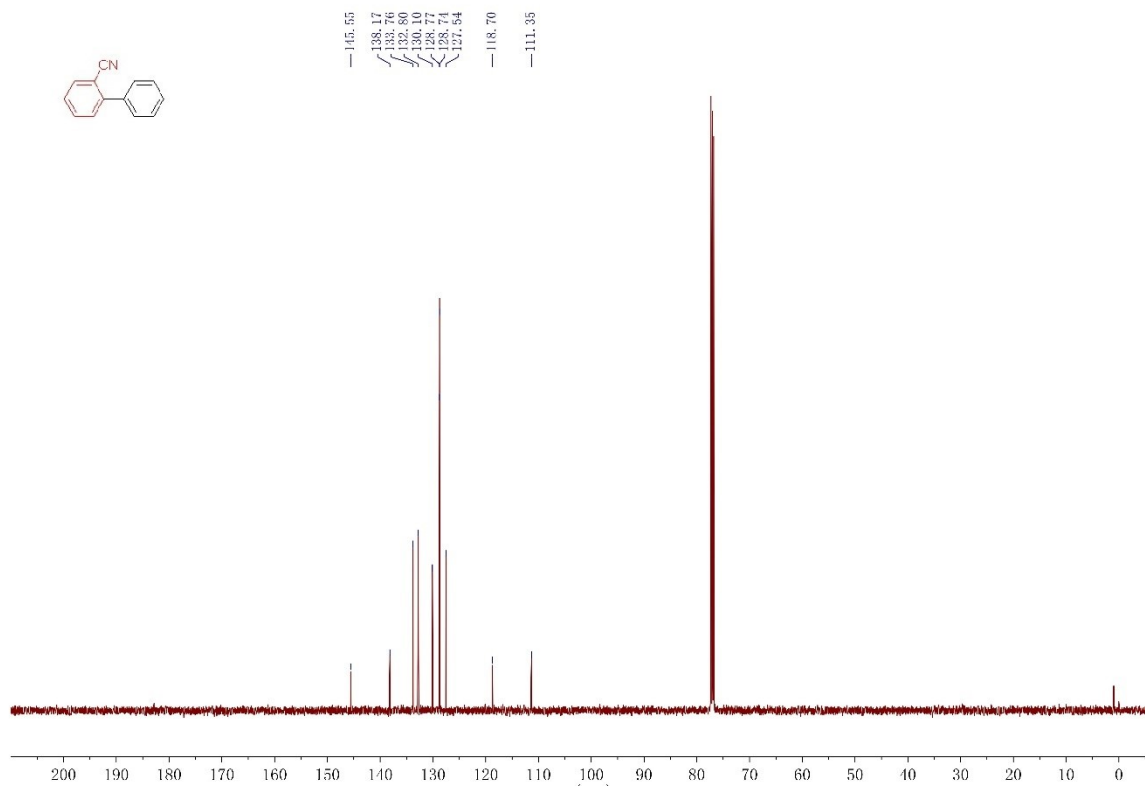

# <sup>1</sup>H NMR (500 MHz, CDCl<sub>3</sub>)

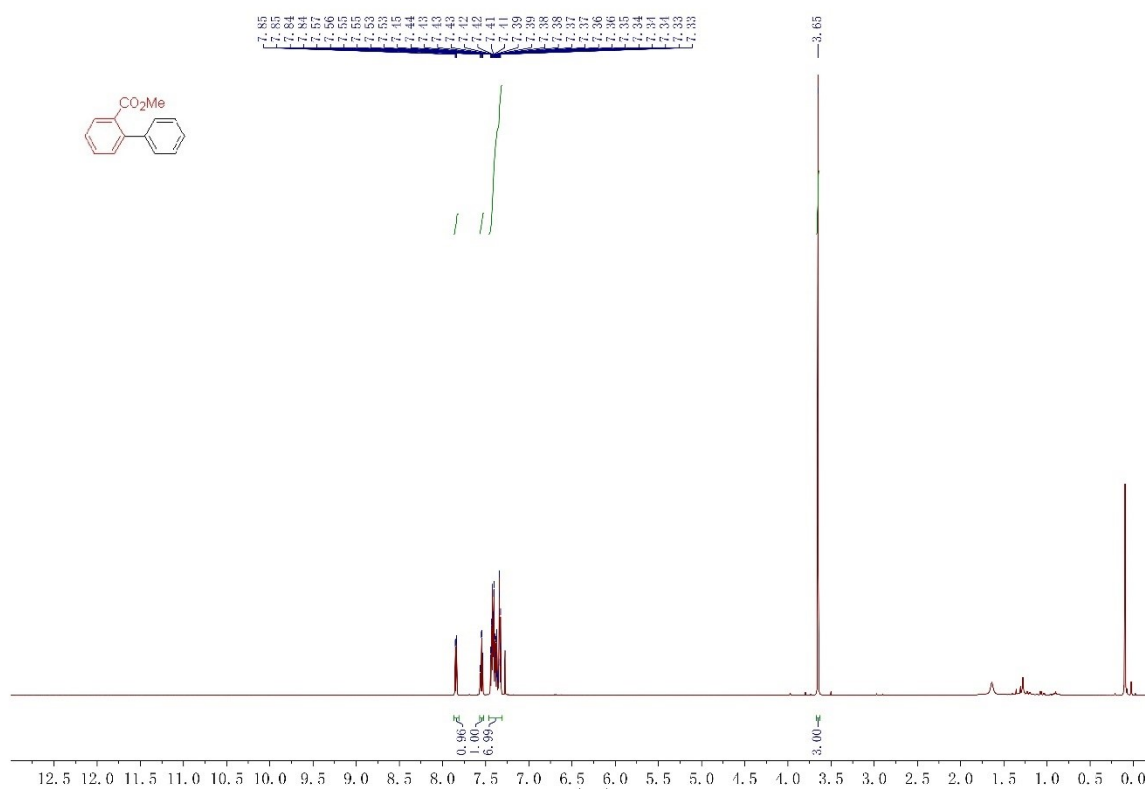

# <sup>13</sup>C NMR (126 MHz, CDCl<sub>3</sub>)

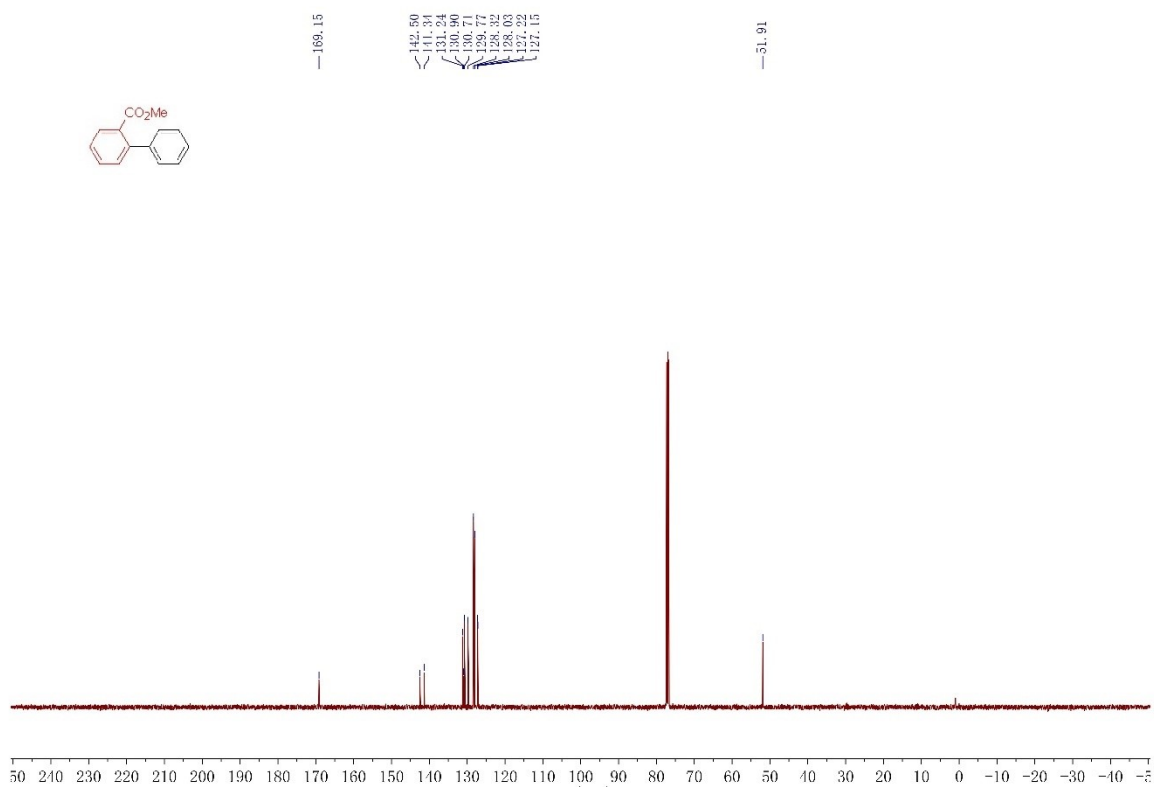

### $^1\text{H}$ NMR (500 MHz, $\text{CDCl}_3$ )

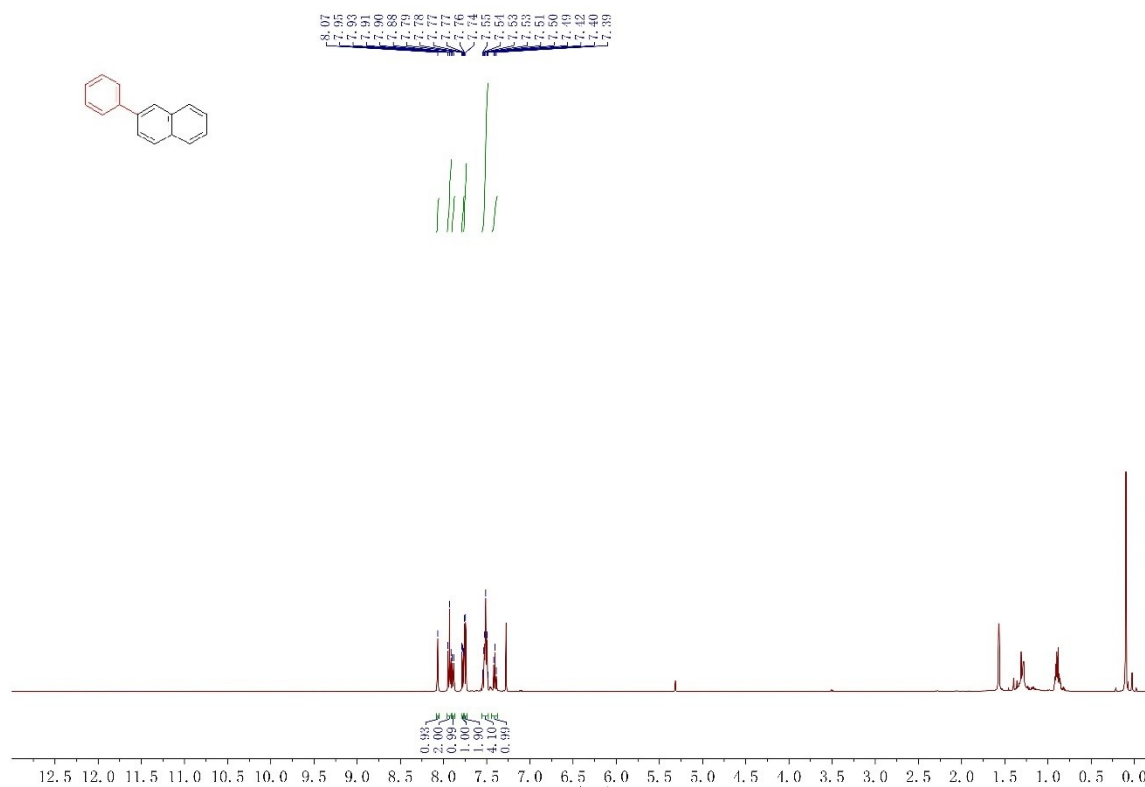

### $^{13}\text{C}$ NMR (126 MHz, $\text{CDCl}_3$ )

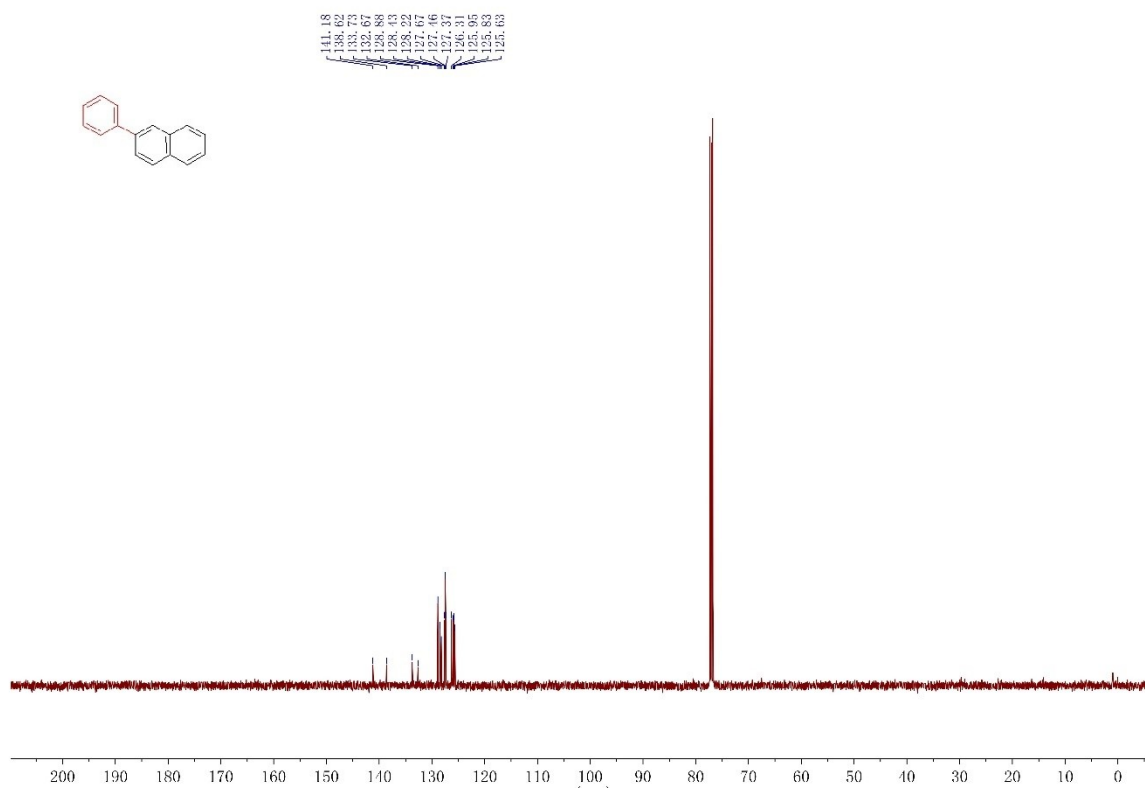

# <sup>1</sup>H NMR (500 MHz, CDCl<sub>3</sub>)

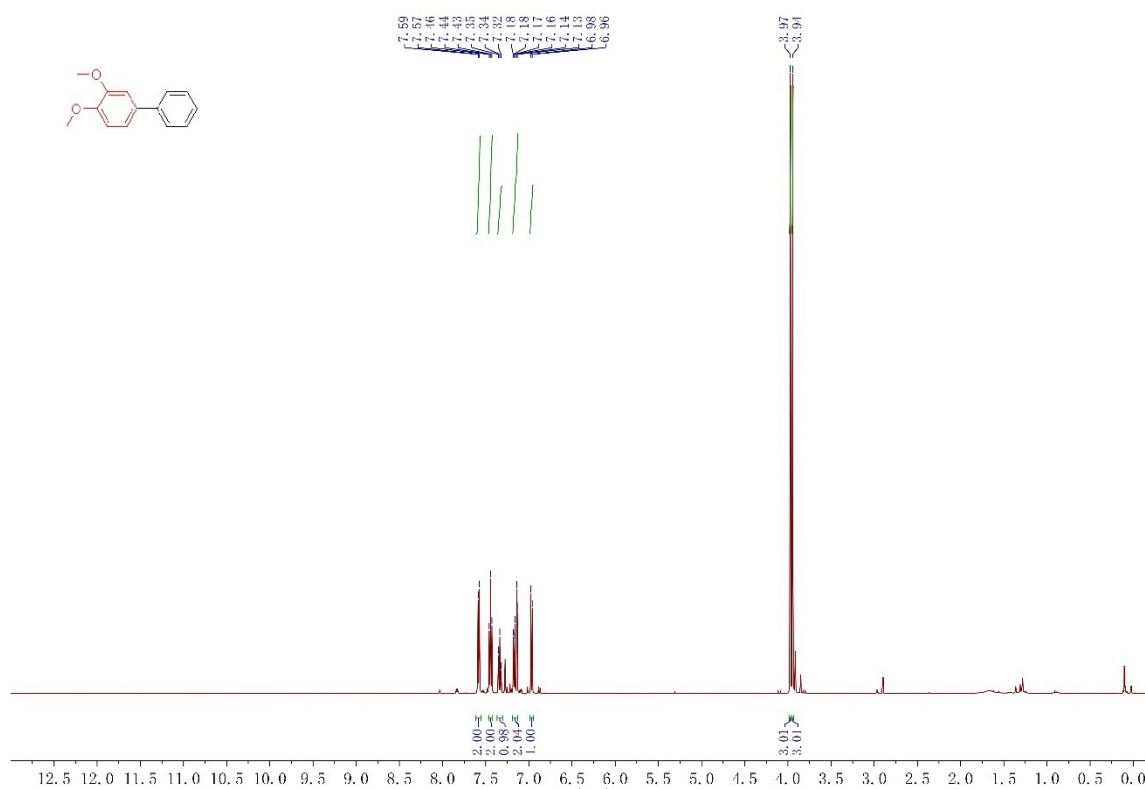

# <sup>13</sup>C NMR (126 MHz, CDCl<sub>3</sub>)

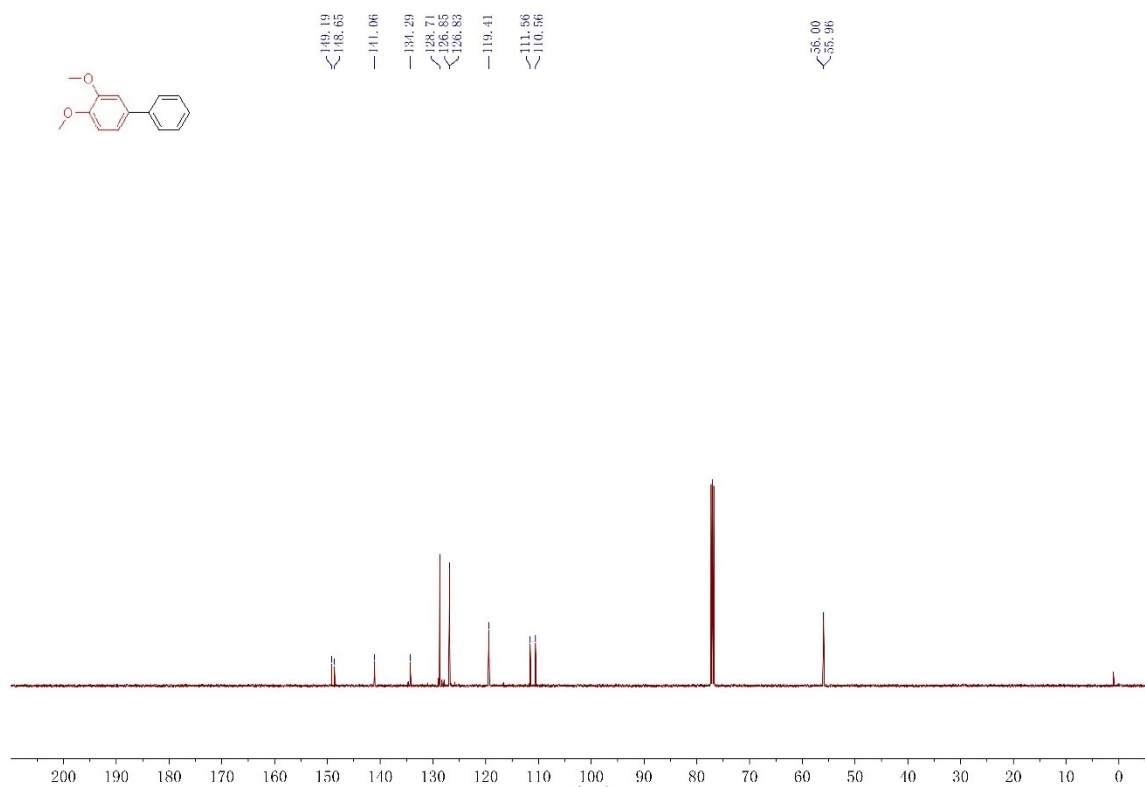

# <sup>1</sup>H NMR (500 MHz, CDCl<sub>3</sub>)

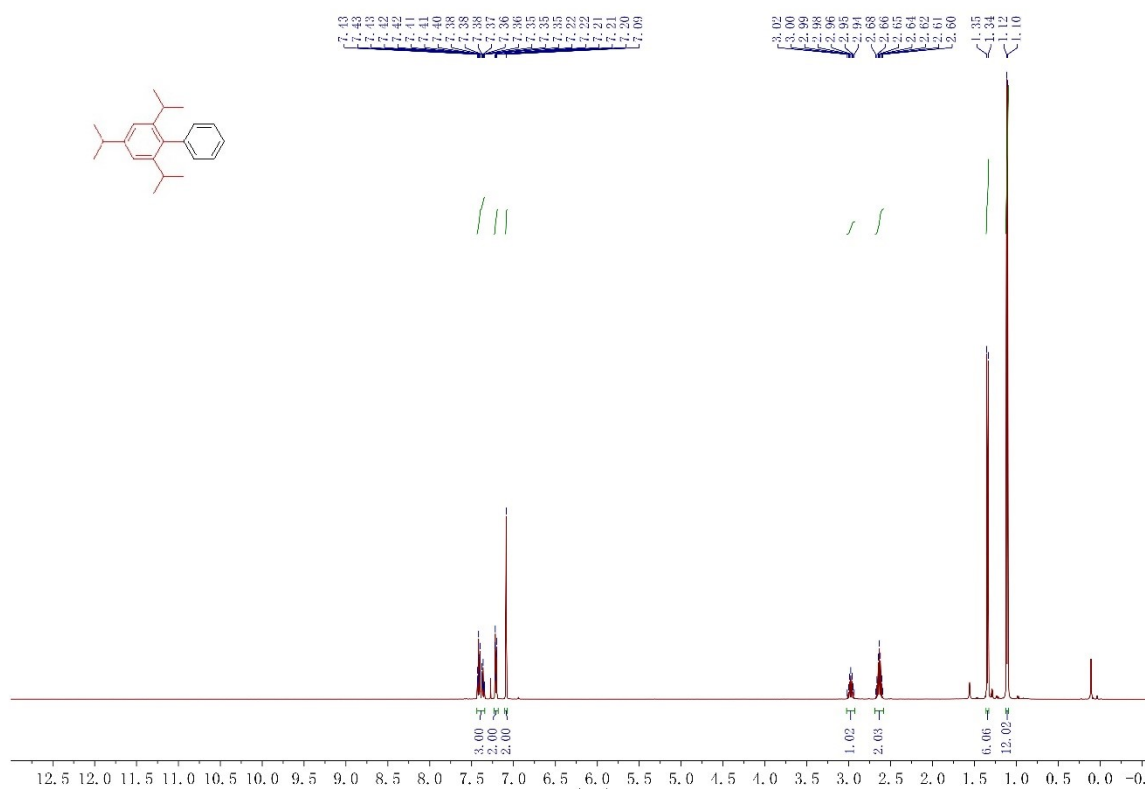

# <sup>13</sup>C NMR (126 MHz, CDCl<sub>3</sub>)

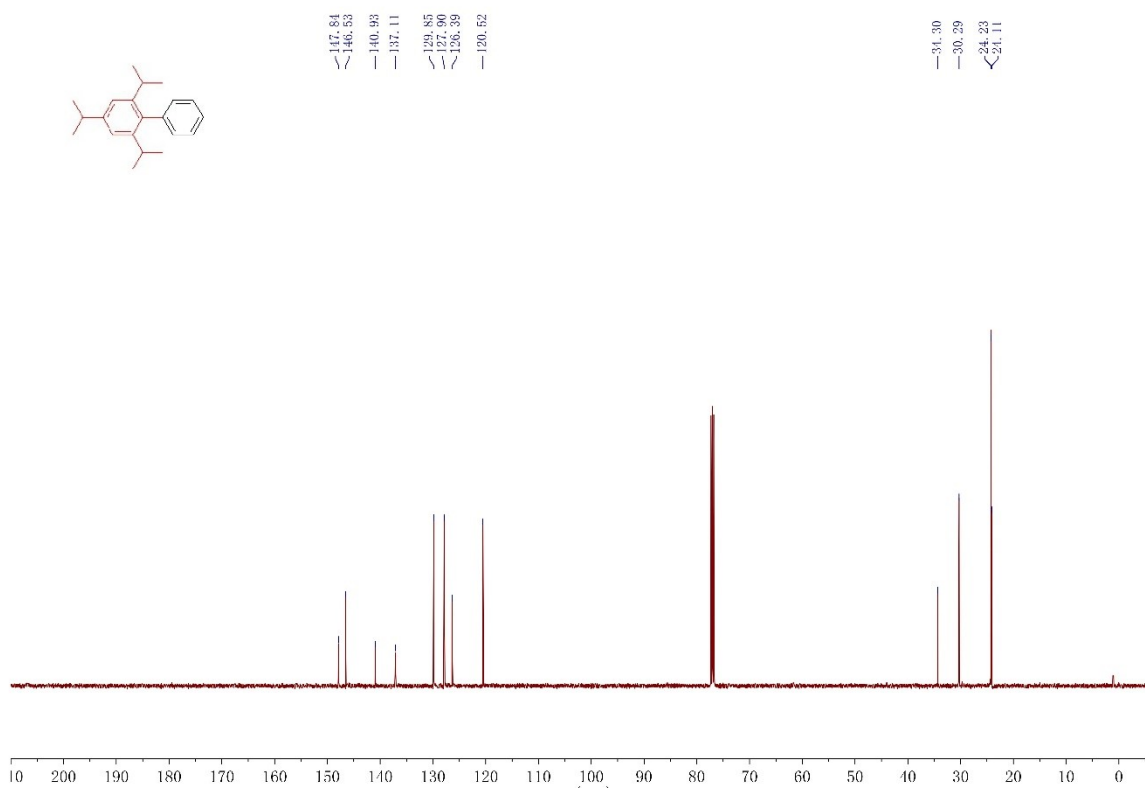

<sup>1</sup>H NMR (500 MHz, CDCl<sub>3</sub>)

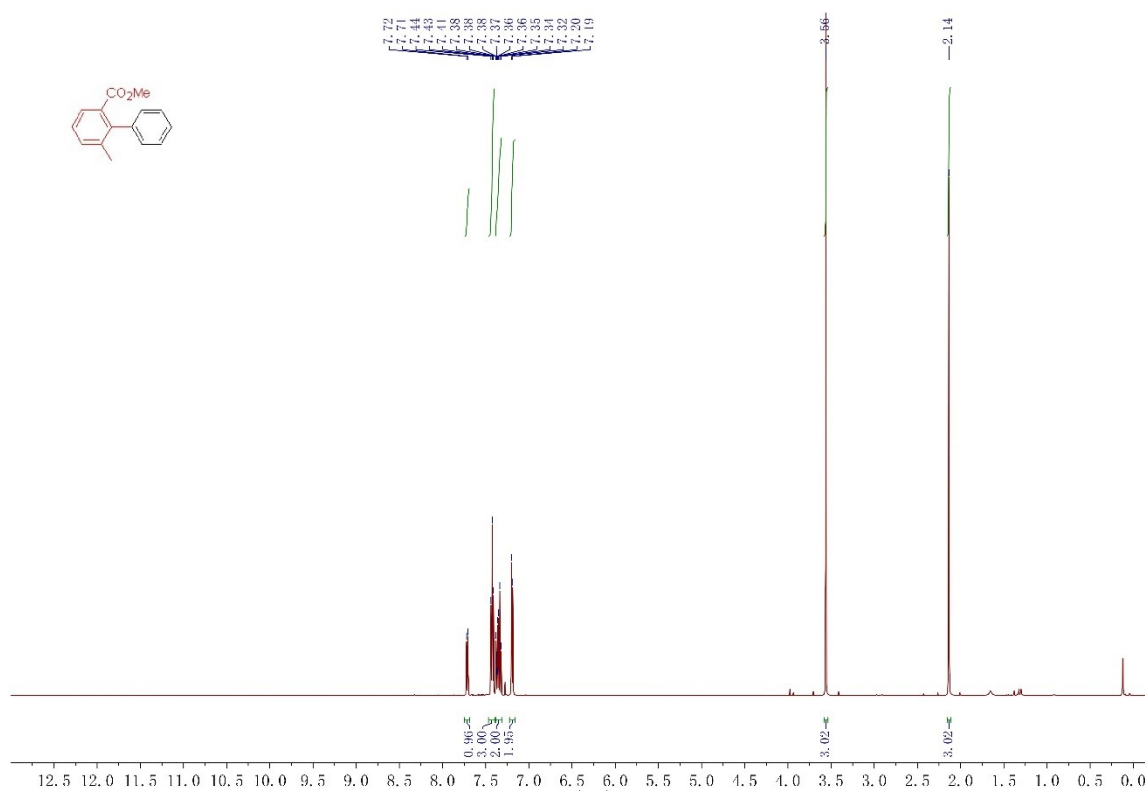

<sup>13</sup>C NMR (126 MHz, CDCl<sub>3</sub>)

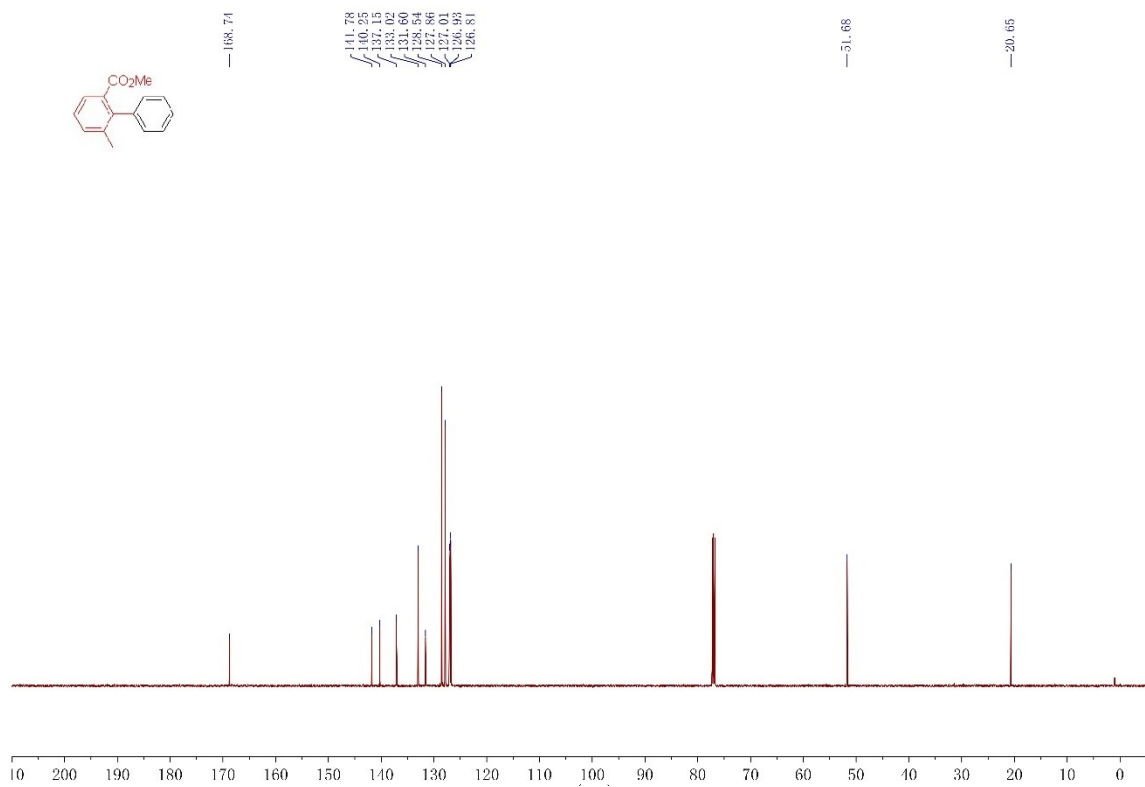

**<sup>1</sup>H NMR (500 MHz, CDCl<sub>3</sub>)**

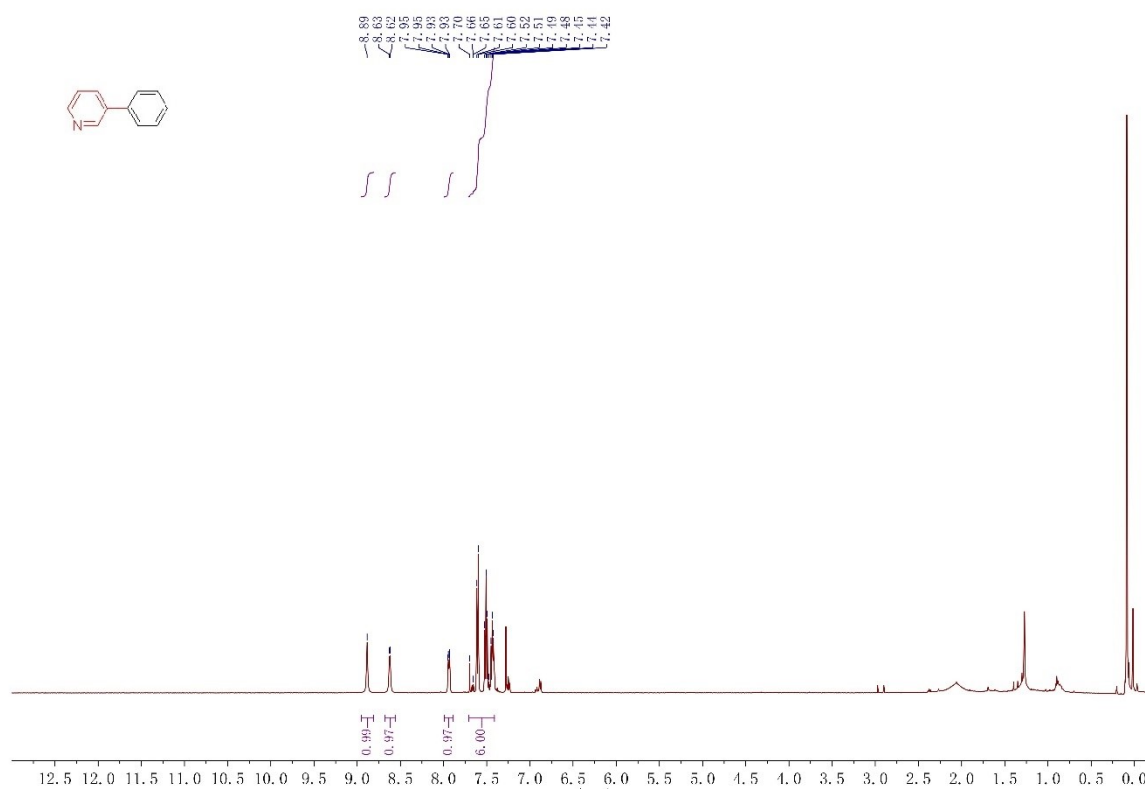

**<sup>13</sup>C NMR (126 MHz, CDCl<sub>3</sub>)**

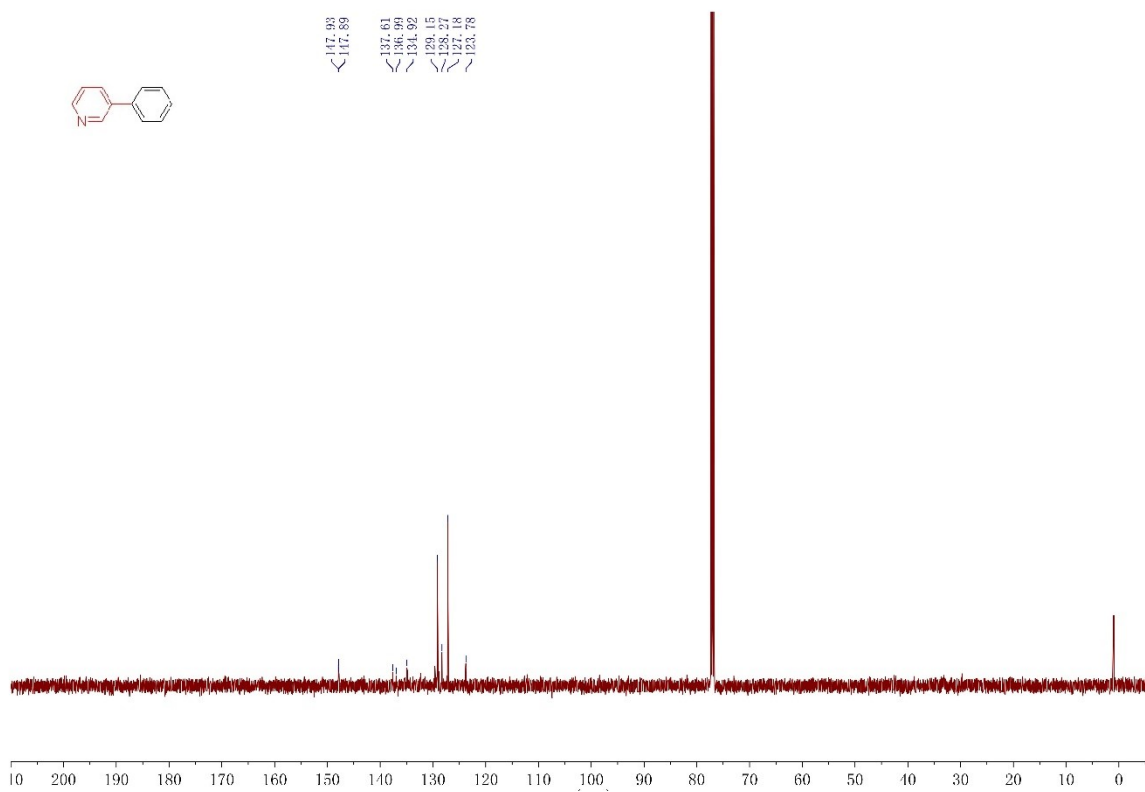

### $^1\text{H}$ NMR (500 MHz, $\text{CDCl}_3$ )

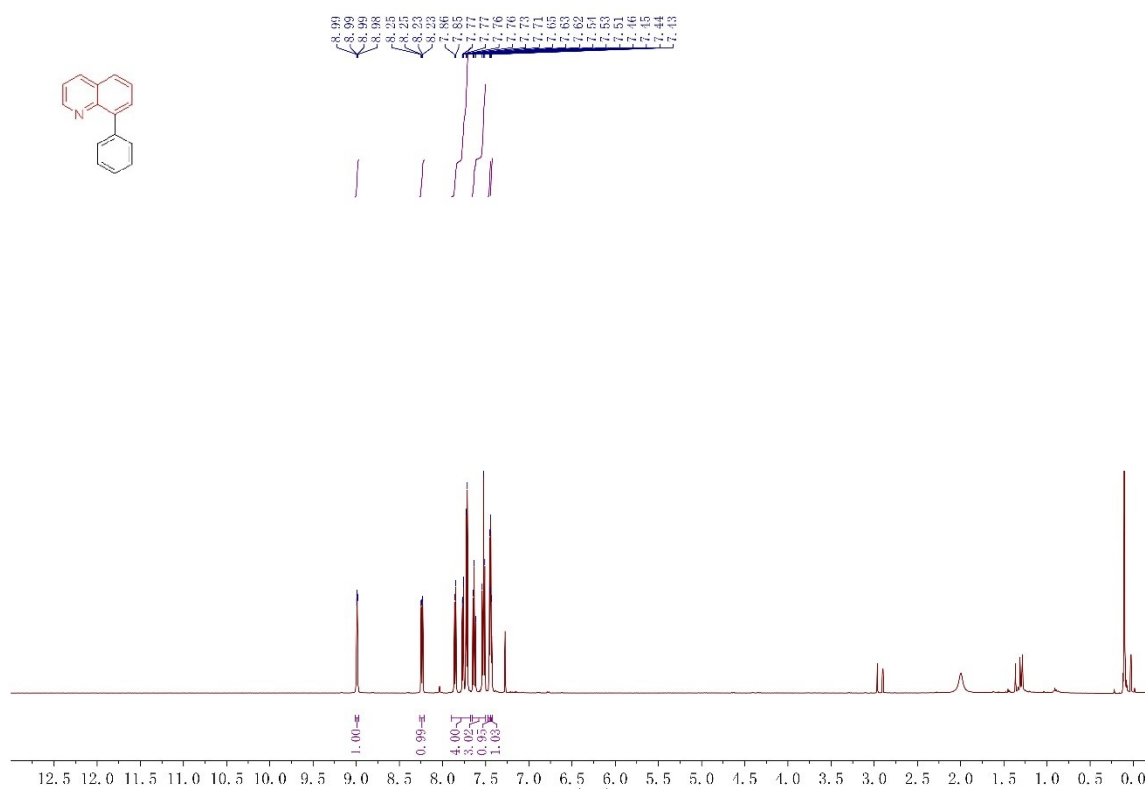

### $^{13}\text{C}$ NMR (126 MHz, $\text{CDCl}_3$ )

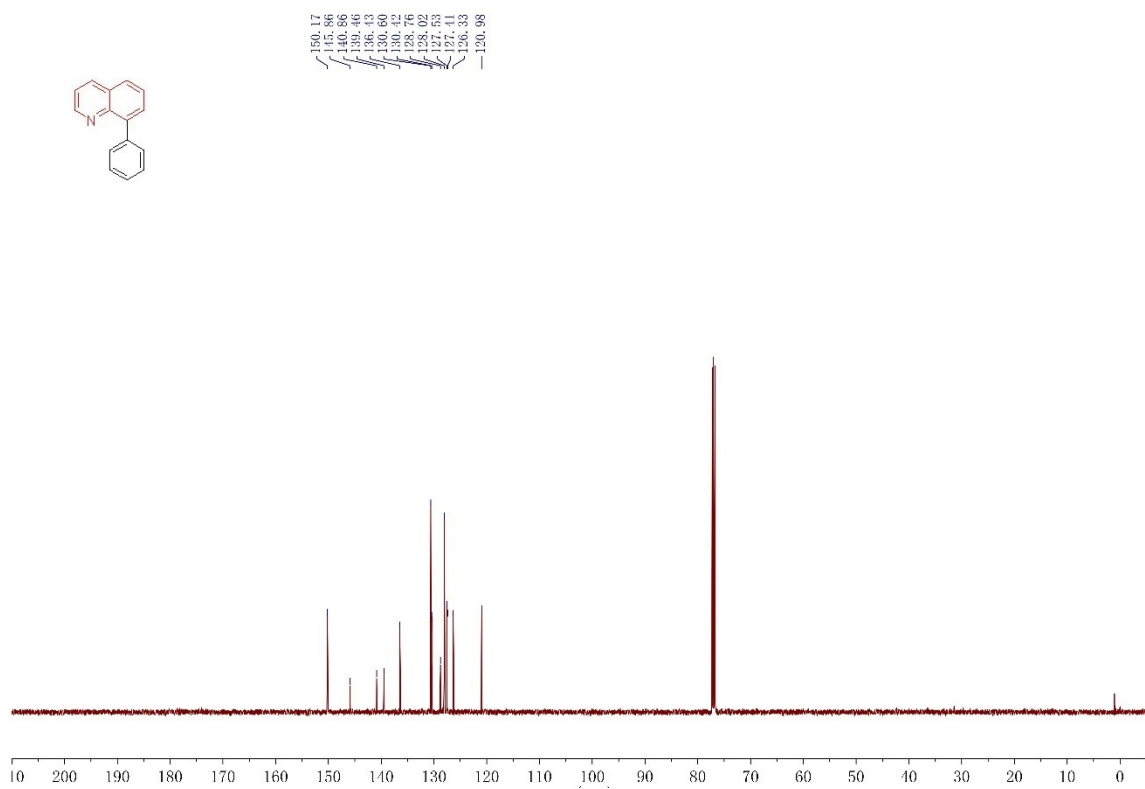



**<sup>1</sup>H NMR (500 MHz, CDCl<sub>3</sub>)**

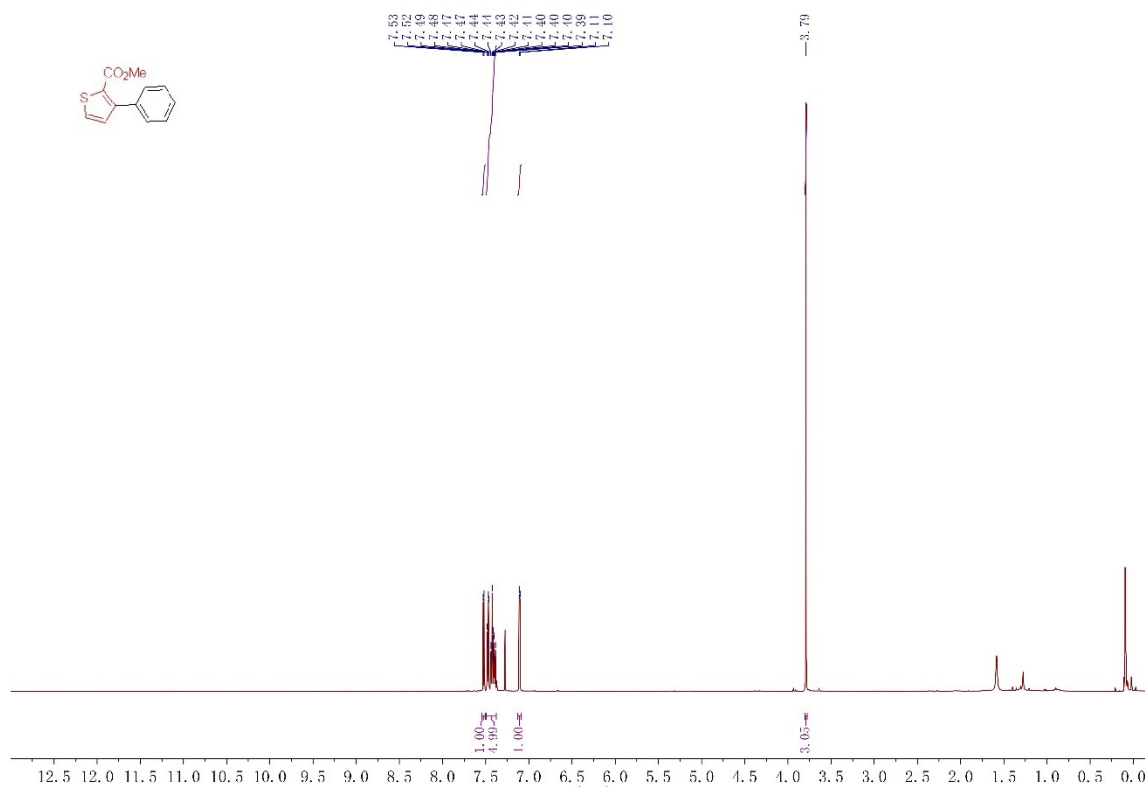

**<sup>13</sup>C NMR (126 MHz, CDCl<sub>3</sub>)**

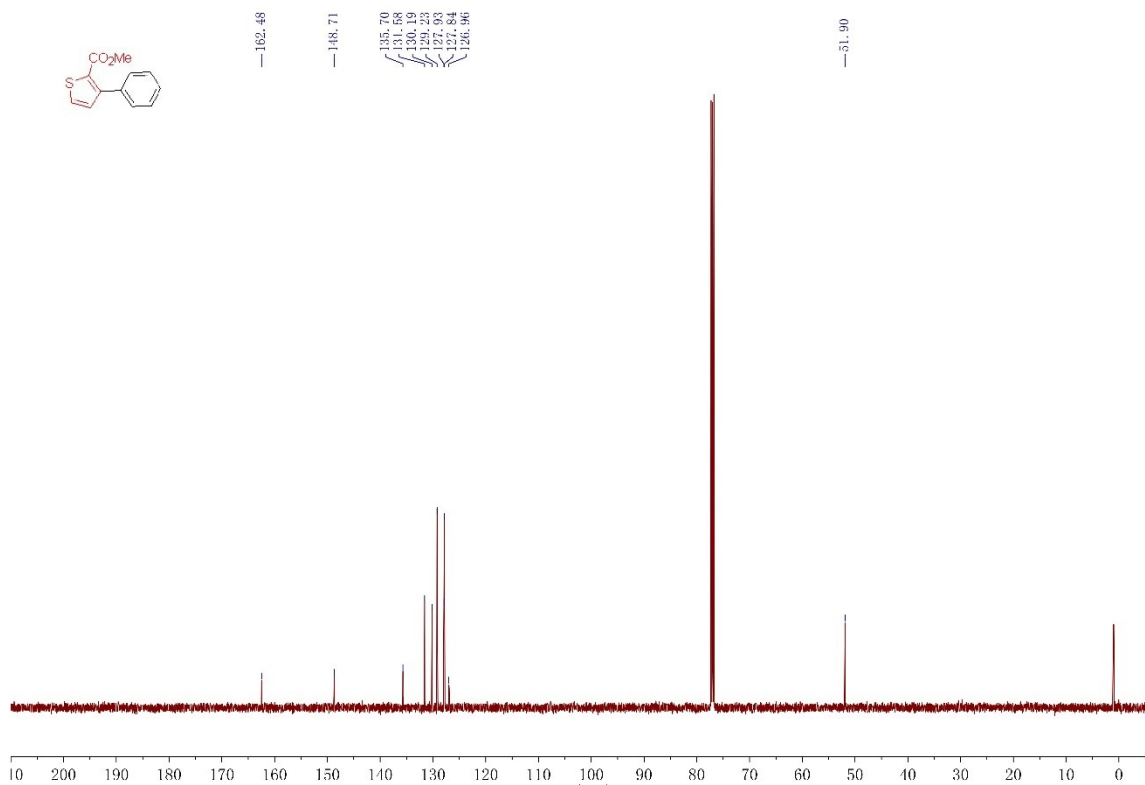

<sup>1</sup>H NMR (500 MHz, CDCl<sub>3</sub>)

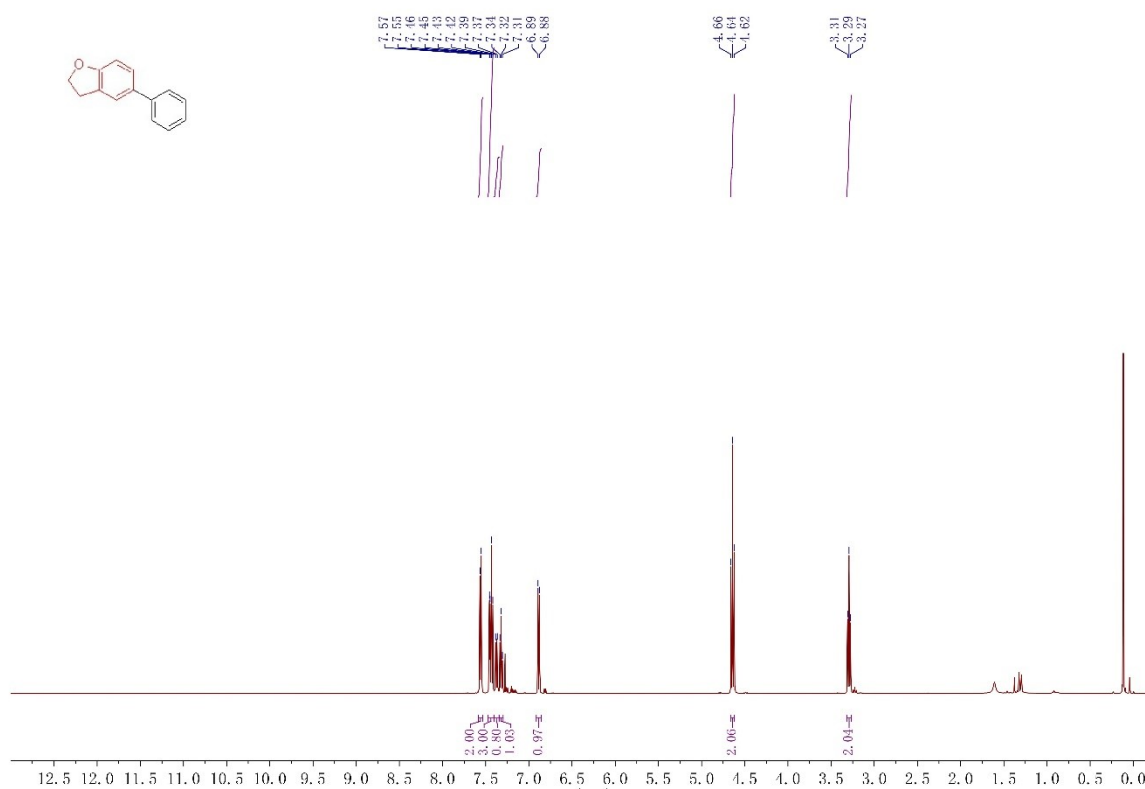

<sup>13</sup>C NMR (126 MHz, CDCl<sub>3</sub>)

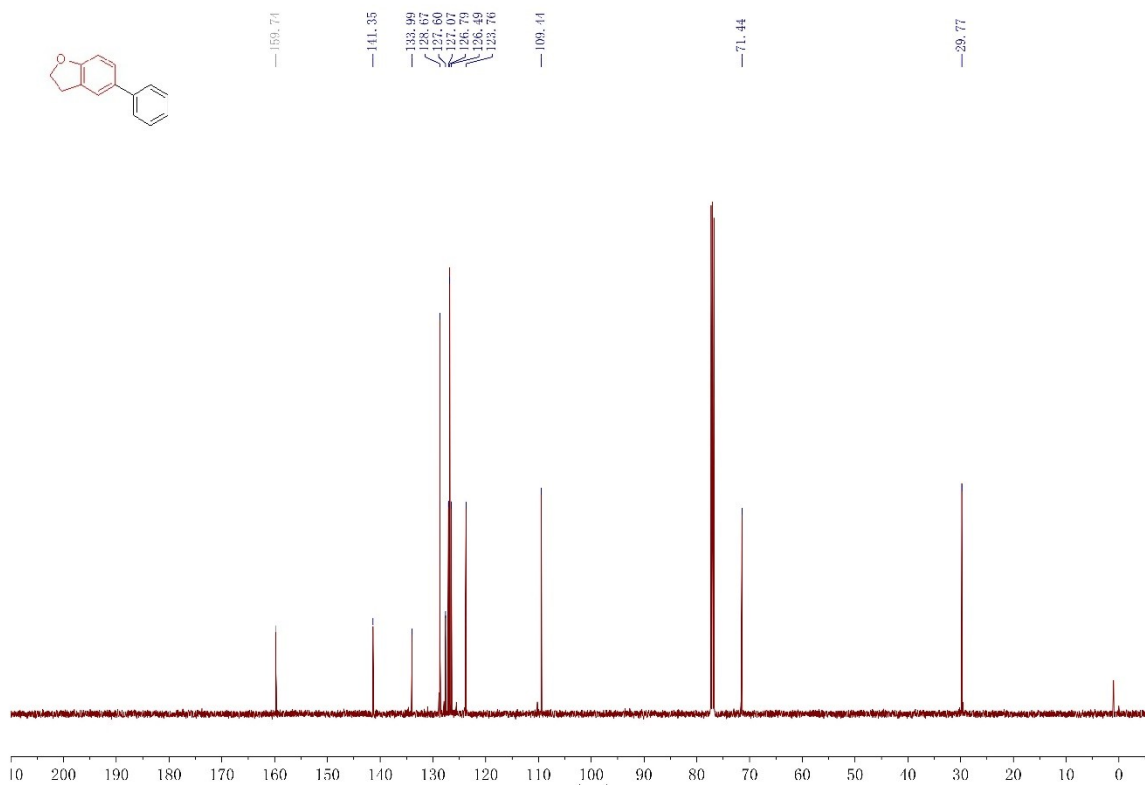

**<sup>1</sup>H NMR (500 MHz, CDCl<sub>3</sub>)**

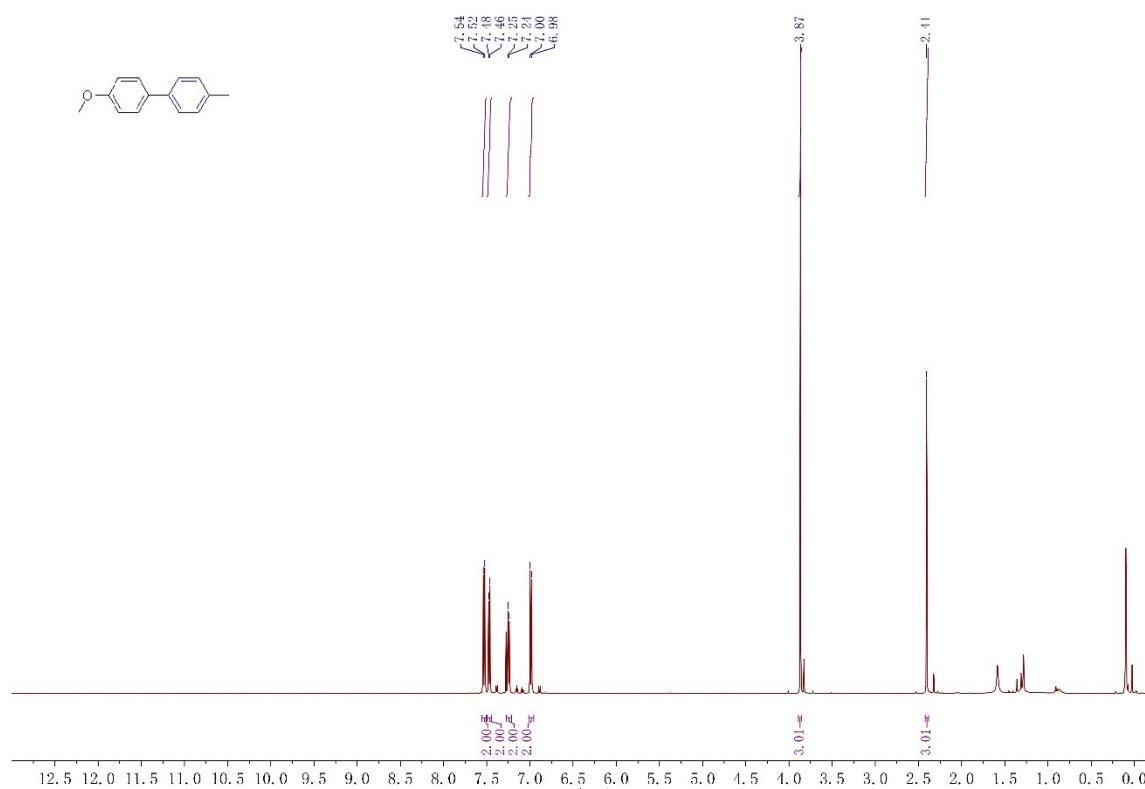

**<sup>13</sup>C NMR (126 MHz, CDCl<sub>3</sub>)**

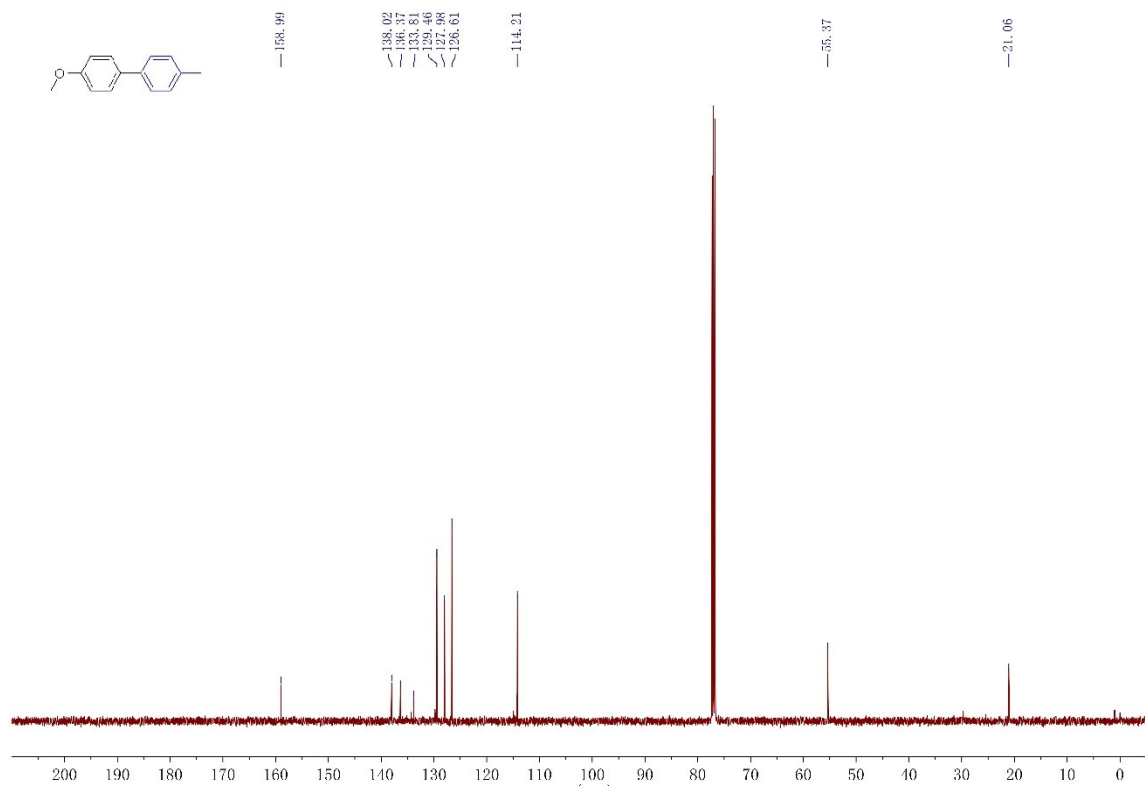

**<sup>1</sup>H NMR (500 MHz, CDCl<sub>3</sub>)**

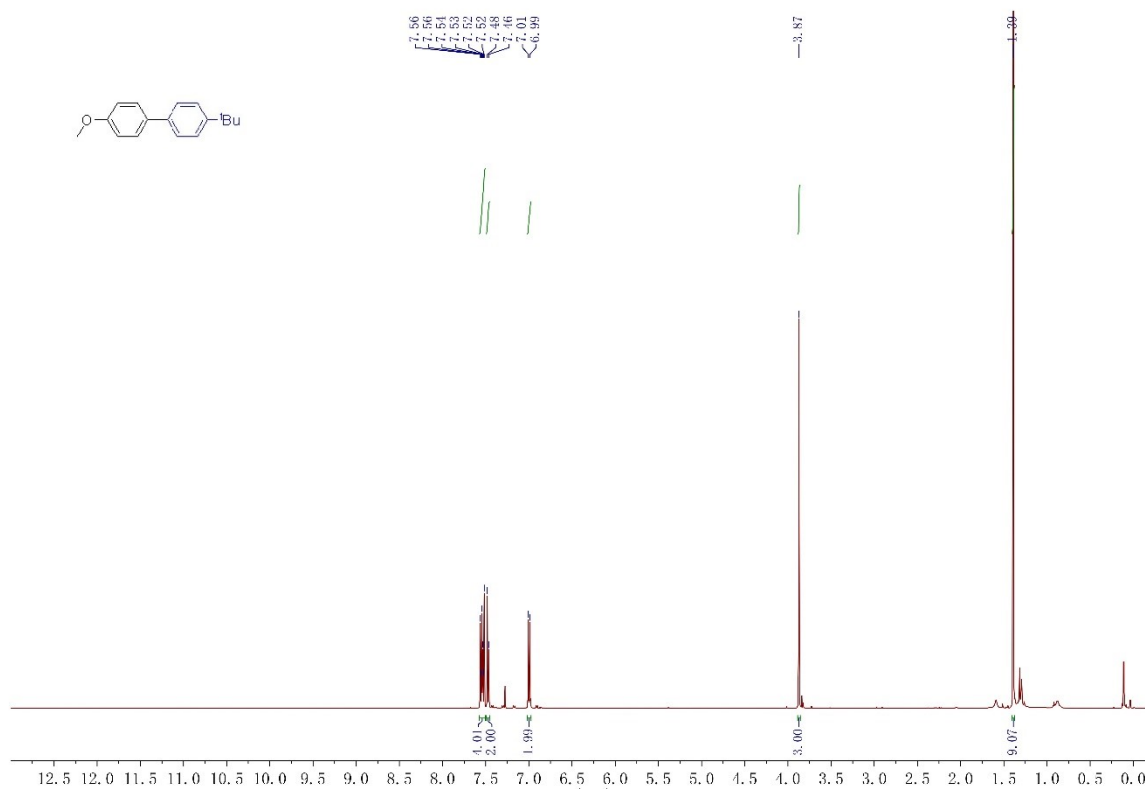

**<sup>13</sup>C NMR (126 MHz, CDCl<sub>3</sub>)**

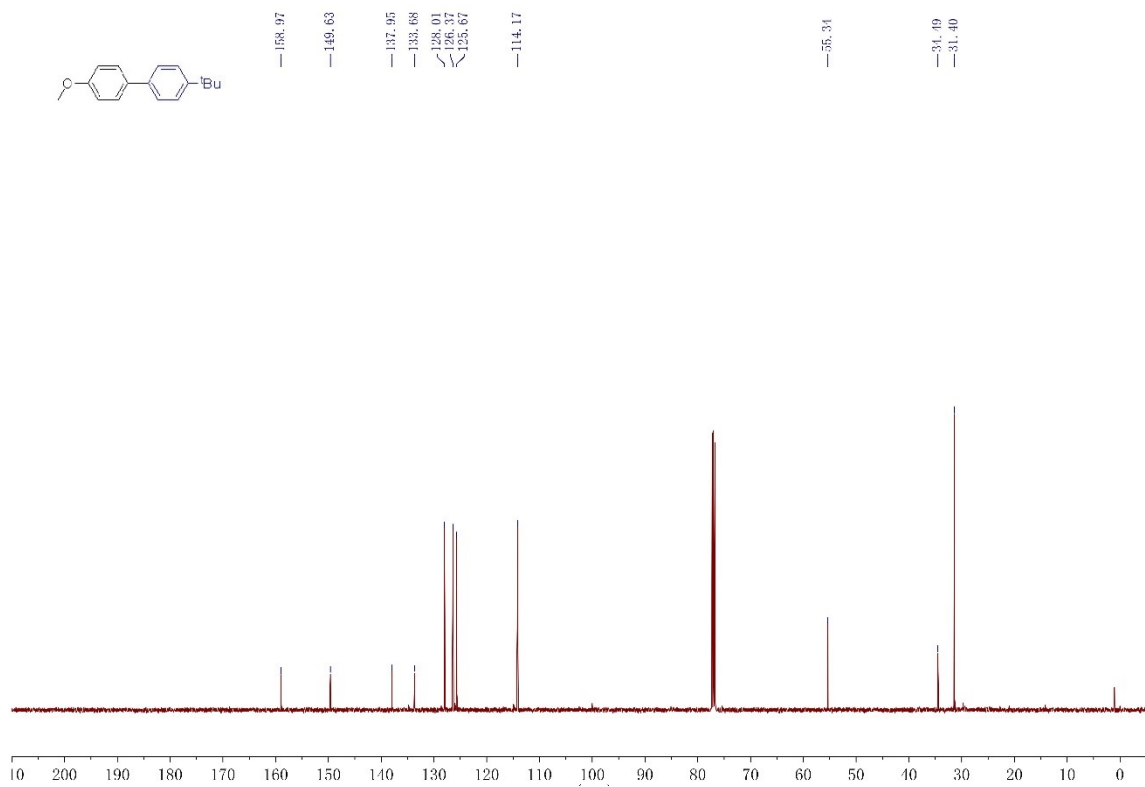

**<sup>1</sup>H NMR (500 MHz, CDCl<sub>3</sub>)**

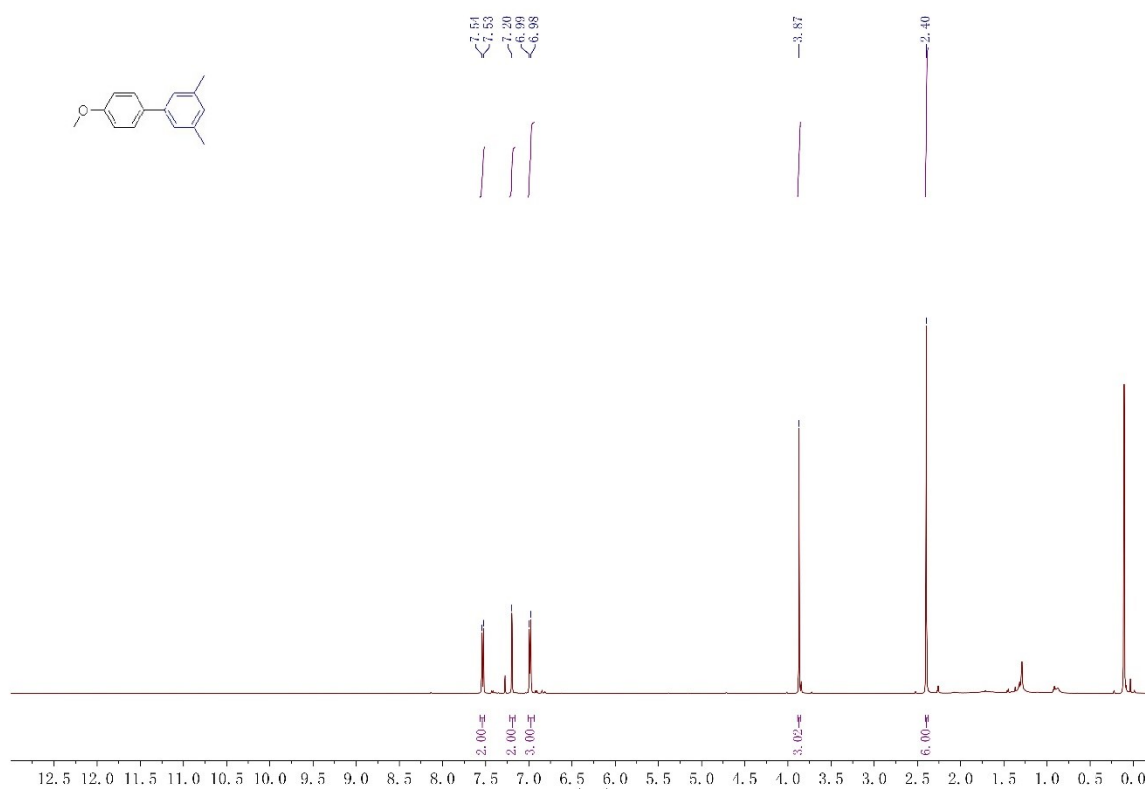

**<sup>13</sup>C NMR (126 MHz, CDCl<sub>3</sub>)**

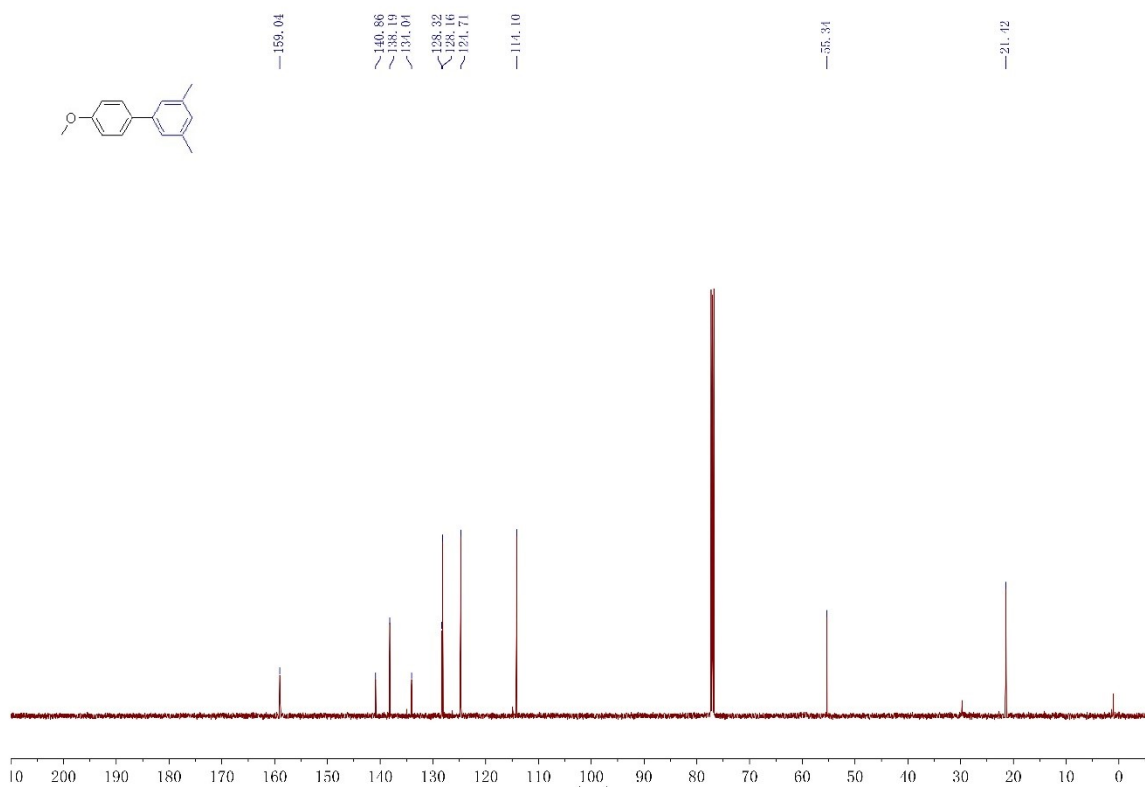

<sup>1</sup>H NMR (500 MHz, CDCl<sub>3</sub>)

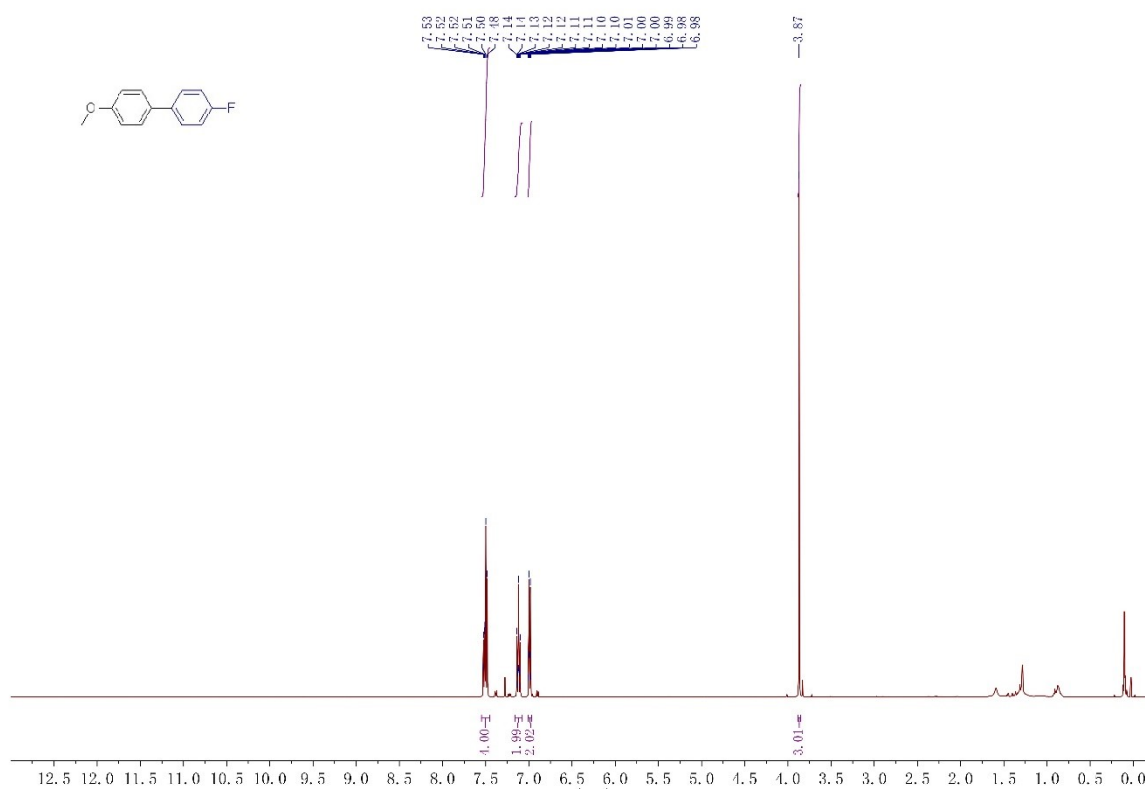

<sup>13</sup>C NMR (126 MHz, CDCl<sub>3</sub>)

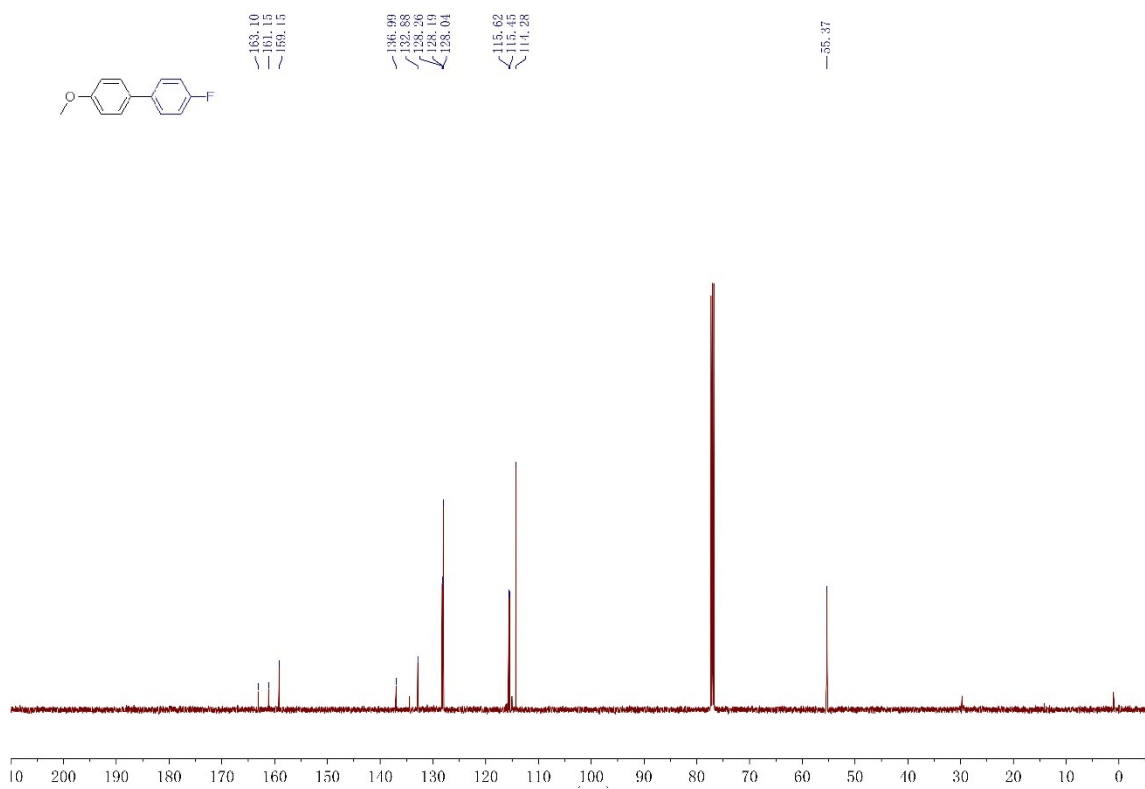

**$^{19}\text{F}$  NMR (565 MHz,  $\text{CDCl}_3$ )**

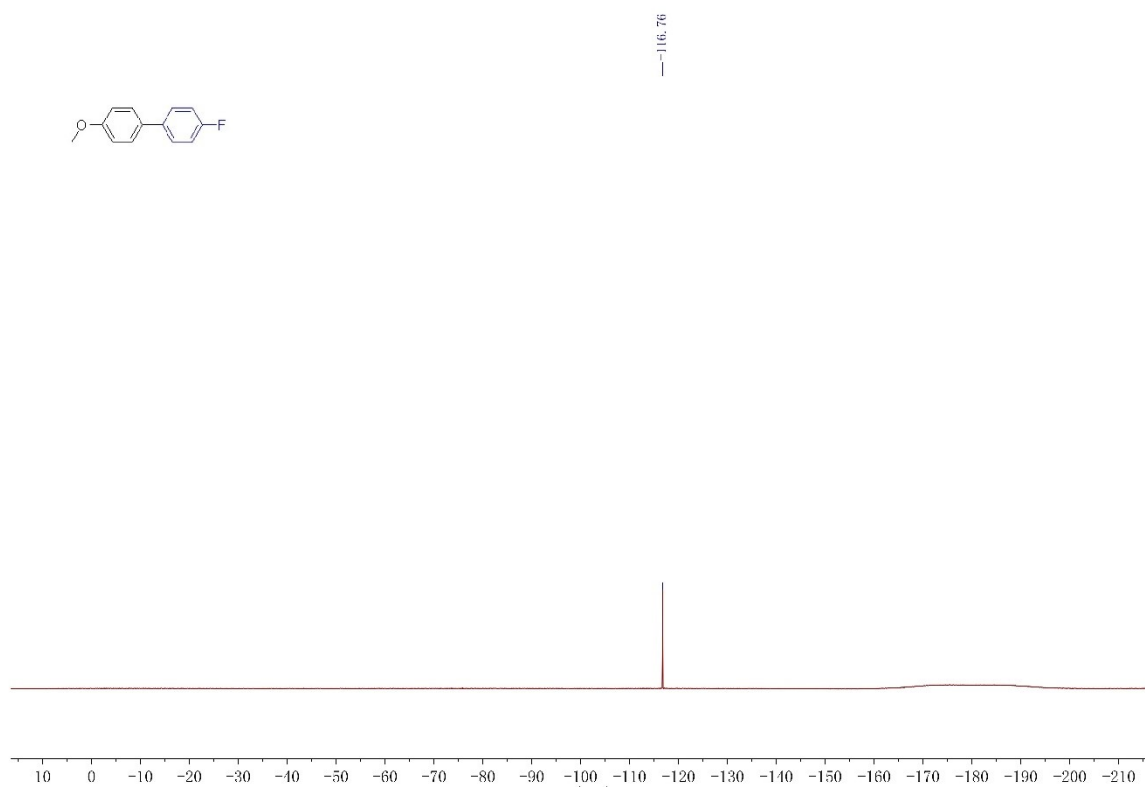

**$^1\text{H}$  NMR (500 MHz,  $\text{CDCl}_3$ )**

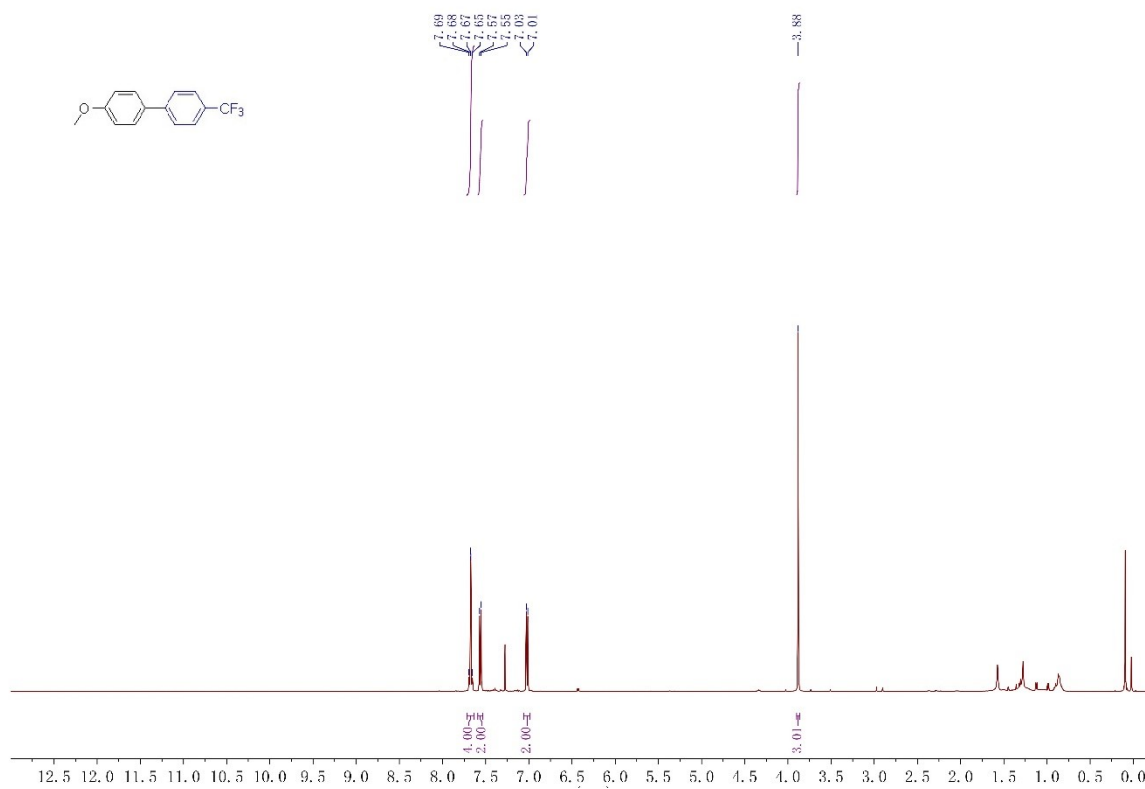

**<sup>13</sup>C NMR (126 MHz, CDCl<sub>3</sub>)**

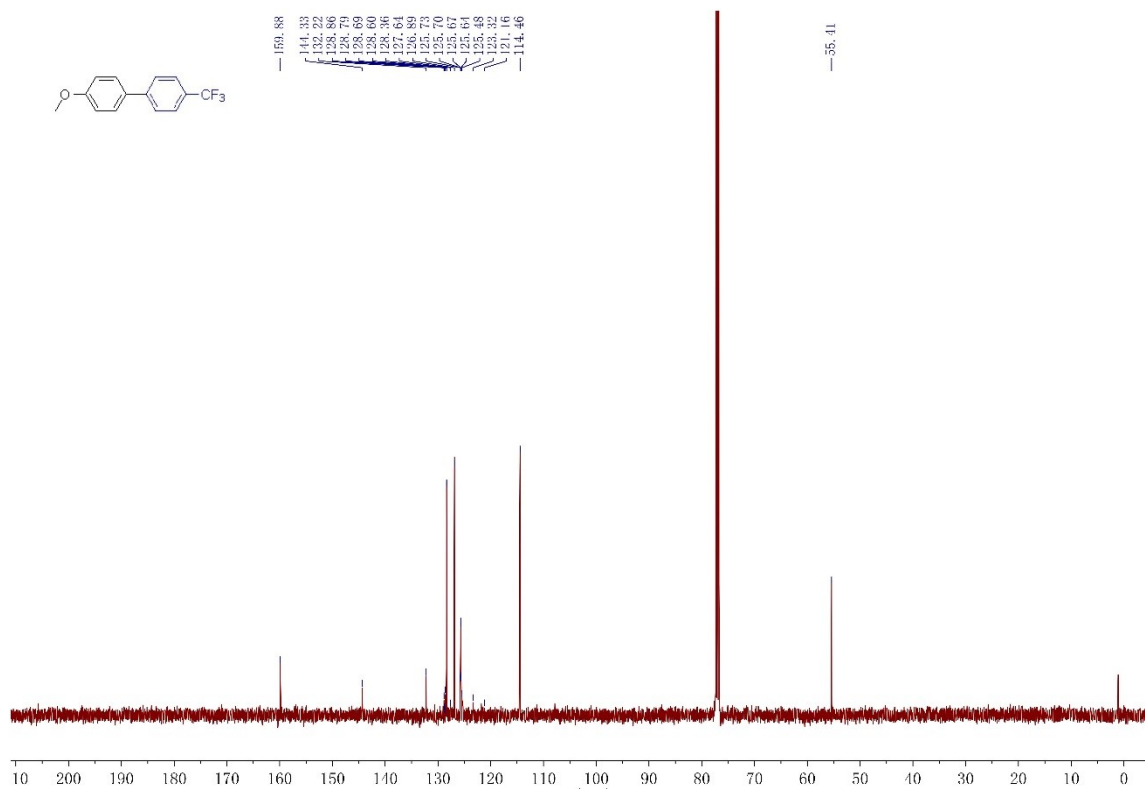

**<sup>19</sup>F NMR (565 MHz, CDCl<sub>3</sub>)**

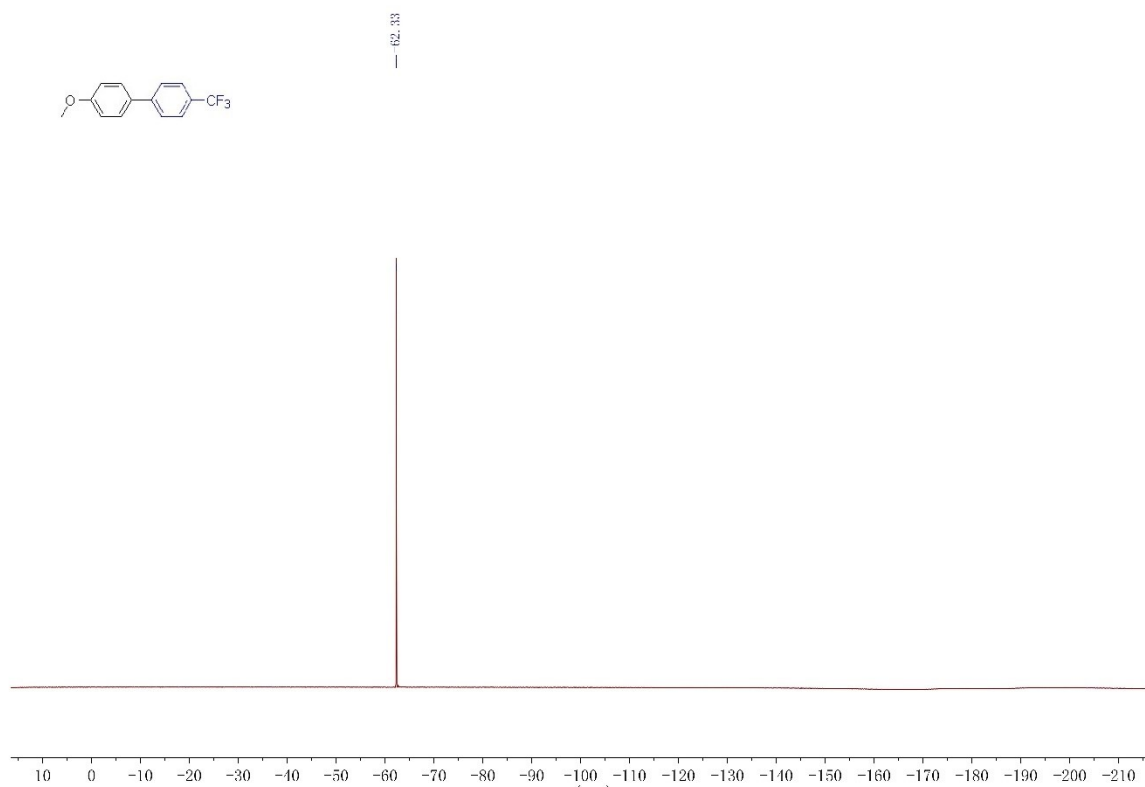



### $^1\text{H}$ NMR (500 MHz, $\text{CDCl}_3$ )

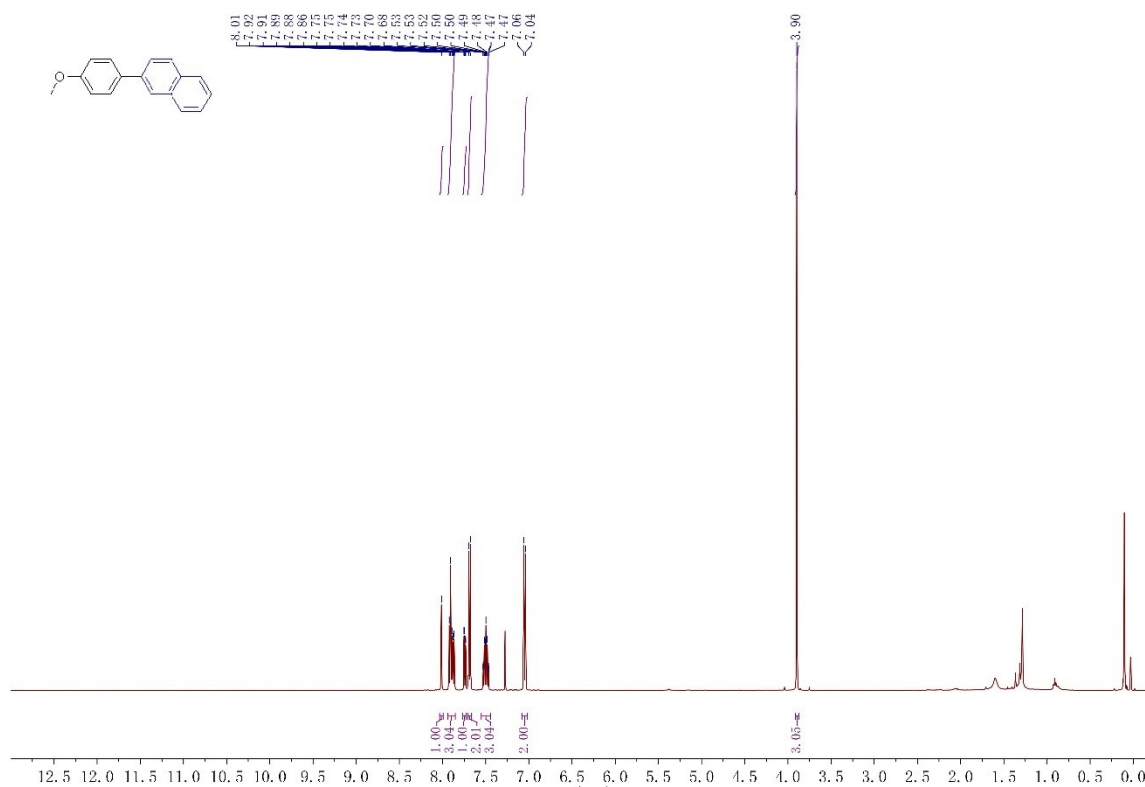

### $^{13}\text{C}$ NMR (126 MHz, $\text{CDCl}_3$ )

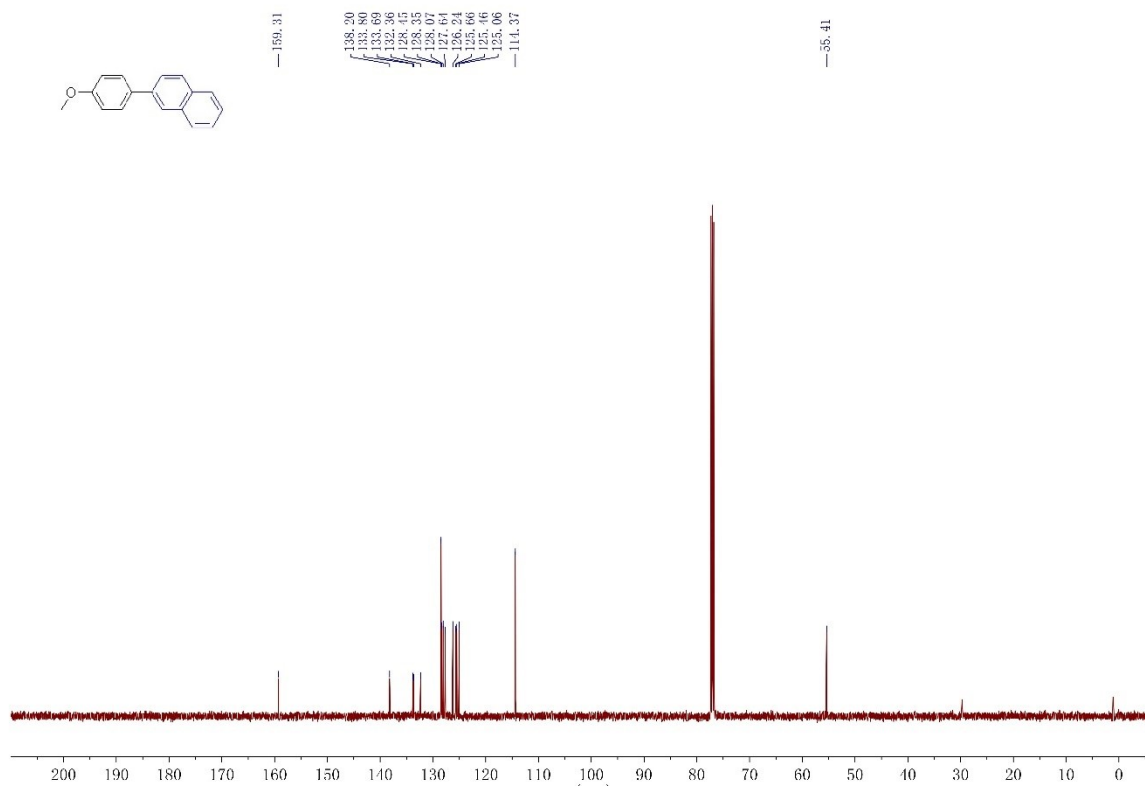

# <sup>1</sup>H NMR (500 MHz, CDCl<sub>3</sub>)

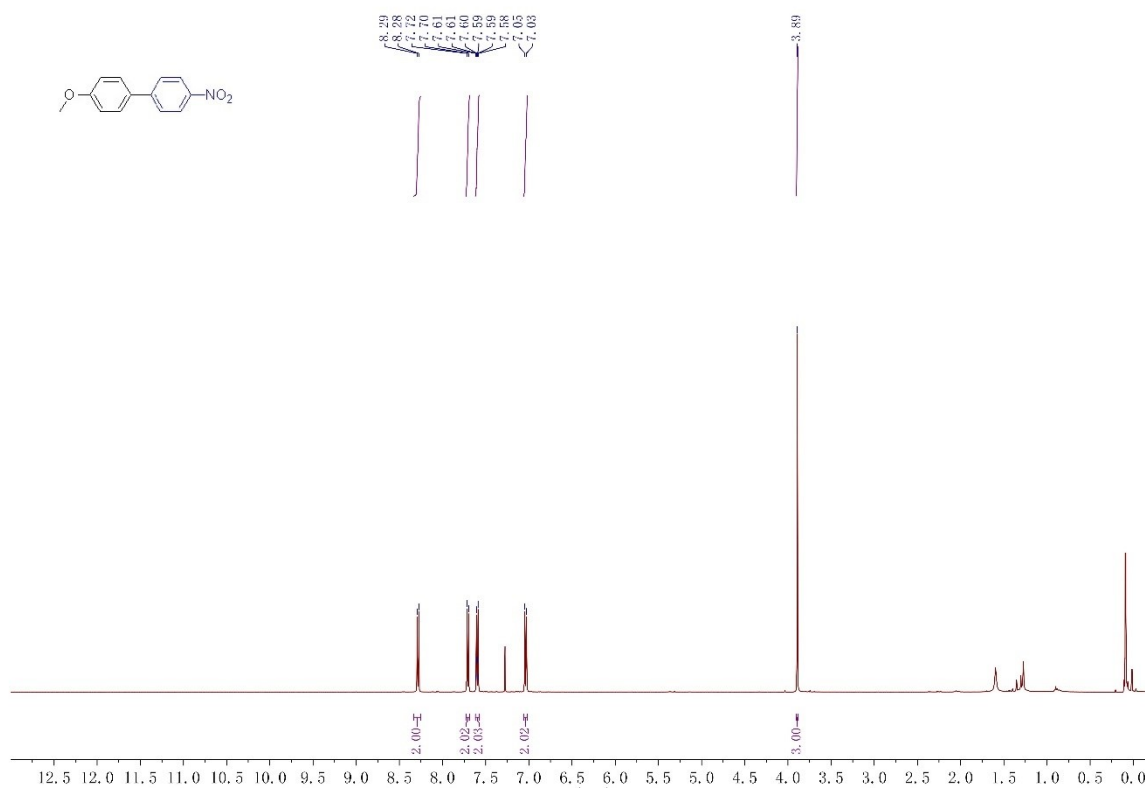

# <sup>13</sup>C NMR (126 MHz, CDCl<sub>3</sub>)

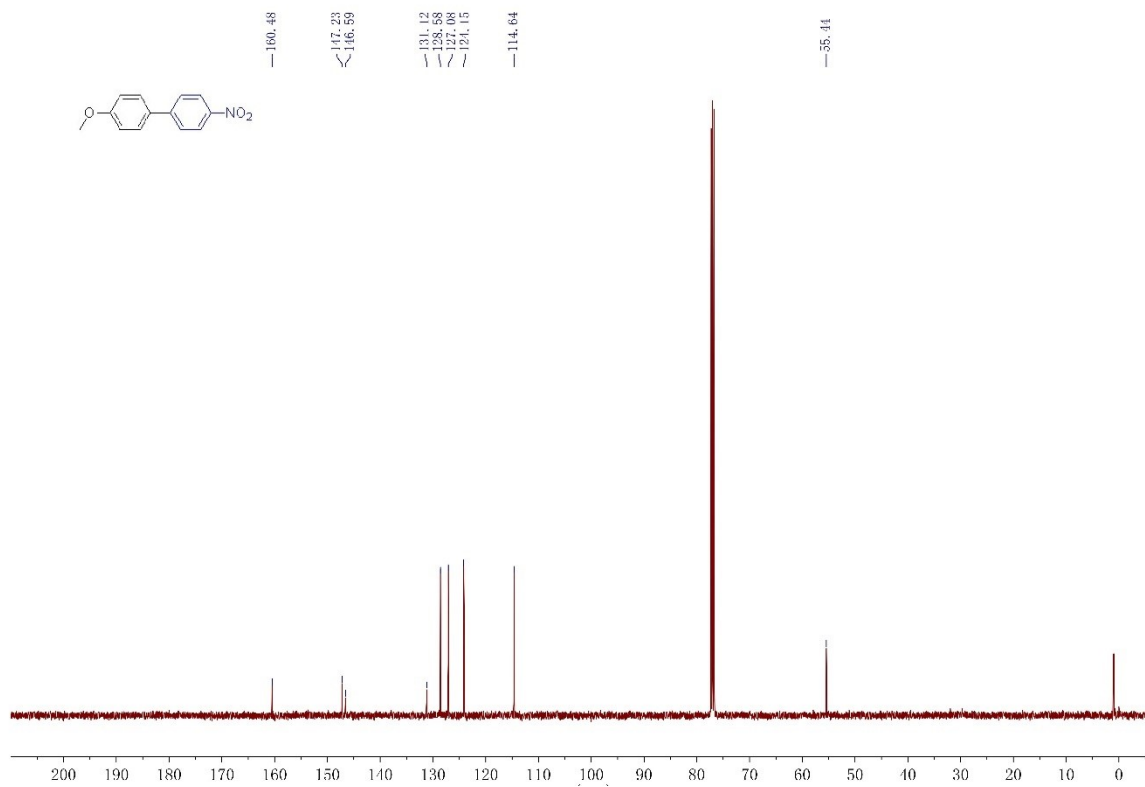

### $^1\text{H}$ NMR (500 MHz, $\text{CDCl}_3$ )

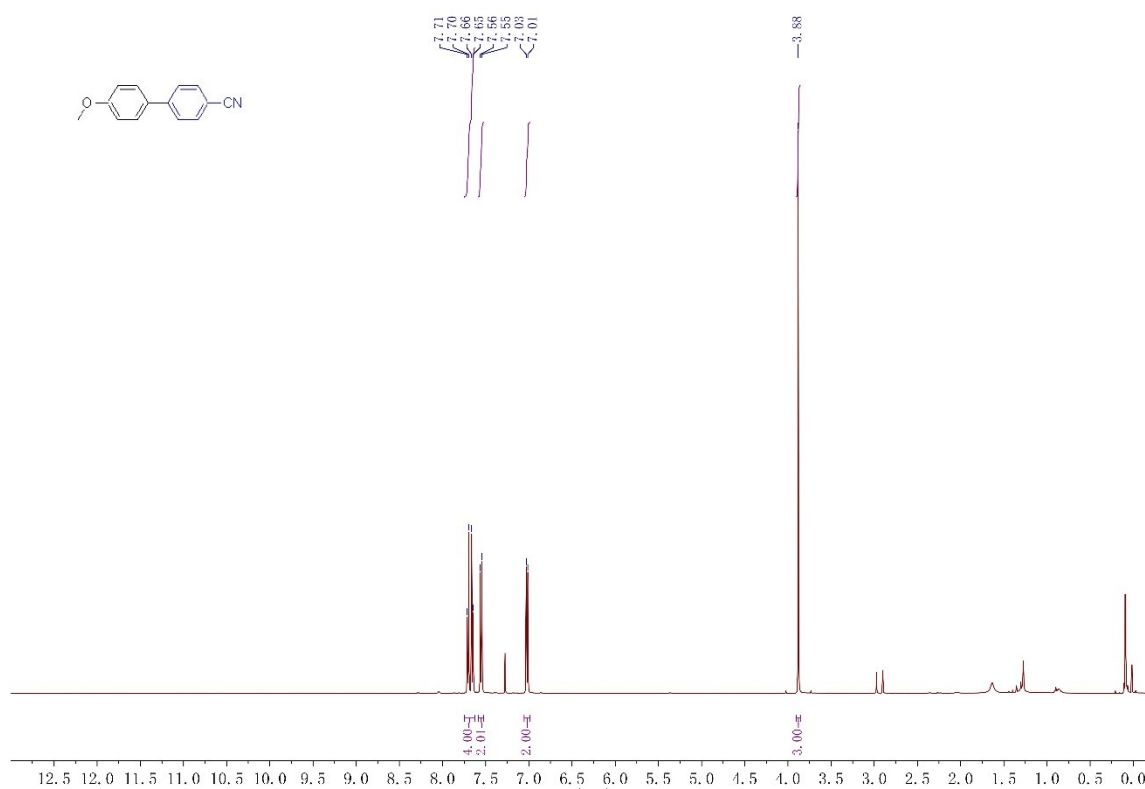

### $^{13}\text{C}$ NMR (126 MHz, $\text{CDCl}_3$ )

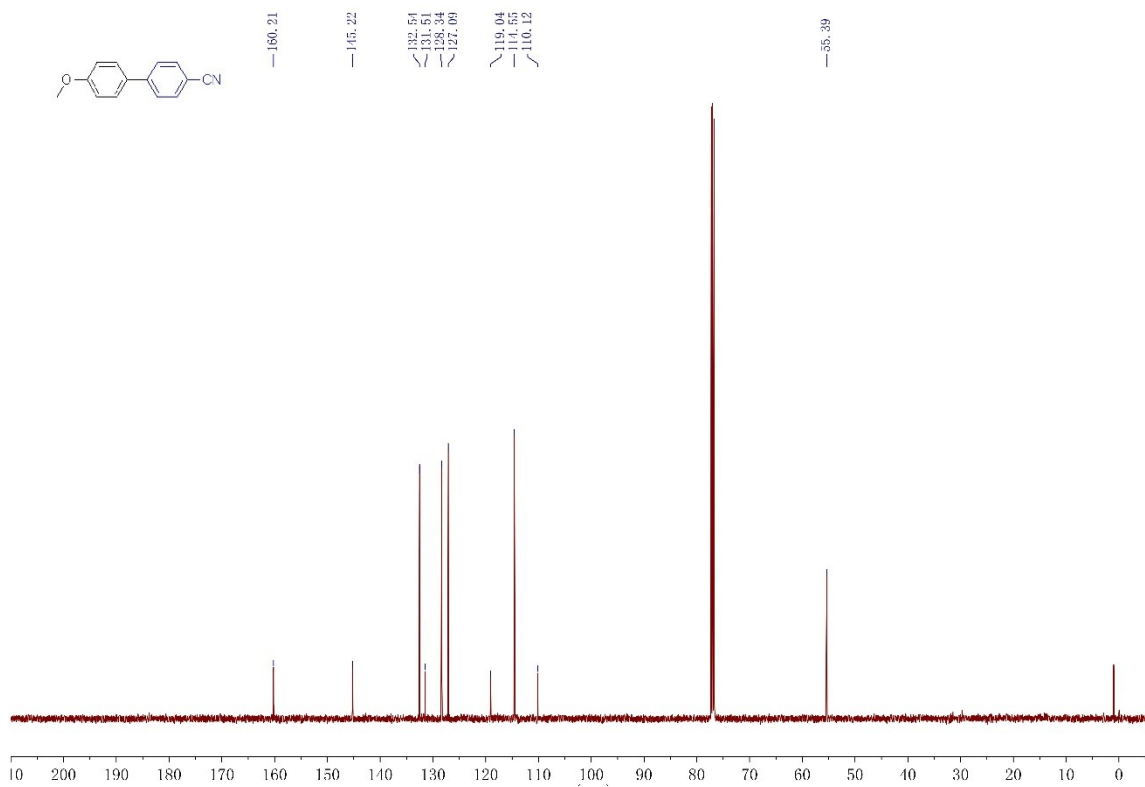

**<sup>1</sup>H NMR (500 MHz, CDCl<sub>3</sub>)**

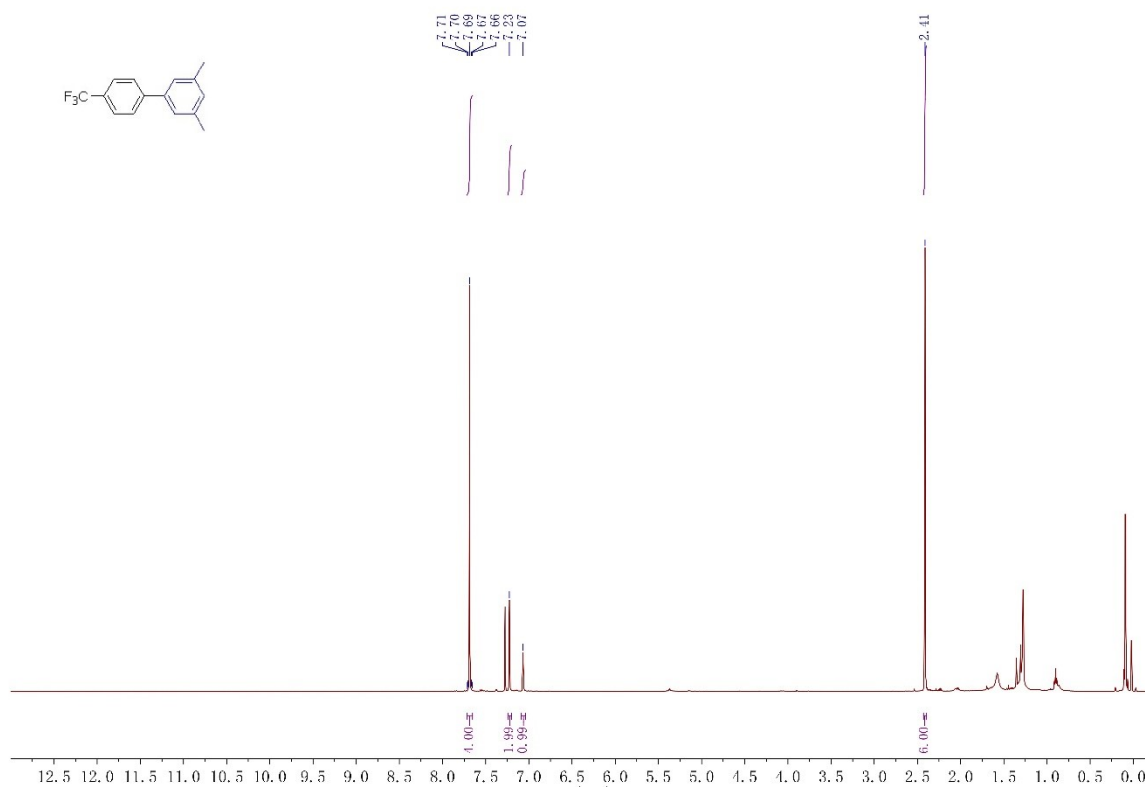

**<sup>13</sup>C NMR (126 MHz, CDCl<sub>3</sub>)**

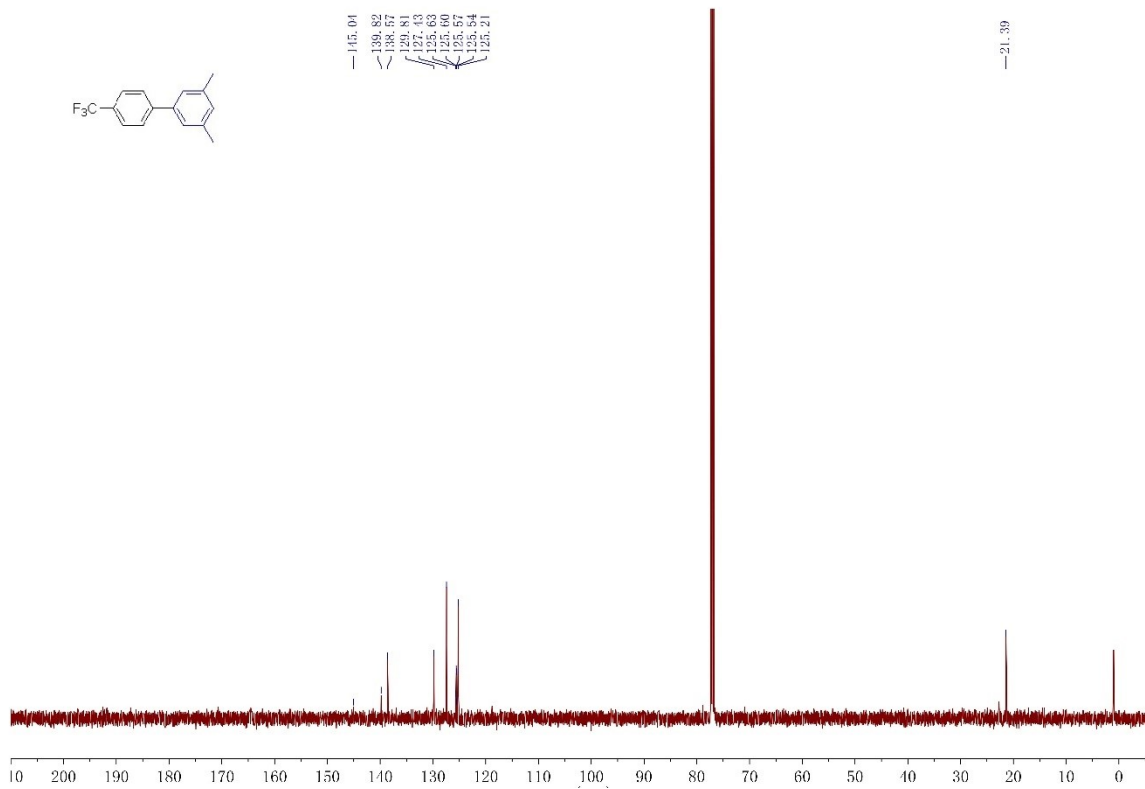

**<sup>19</sup>F NMR (565 MHz, CDCl<sub>3</sub>)**

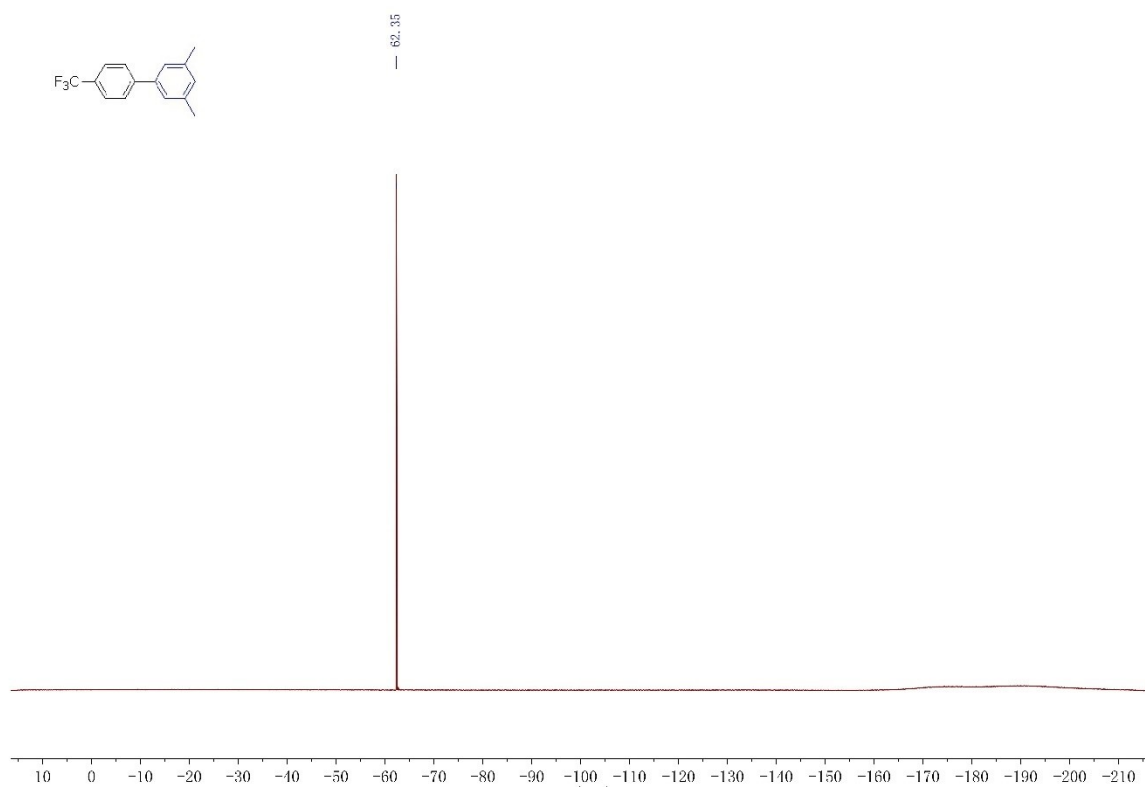

**<sup>1</sup>H NMR (500 MHz, CDCl<sub>3</sub>)**

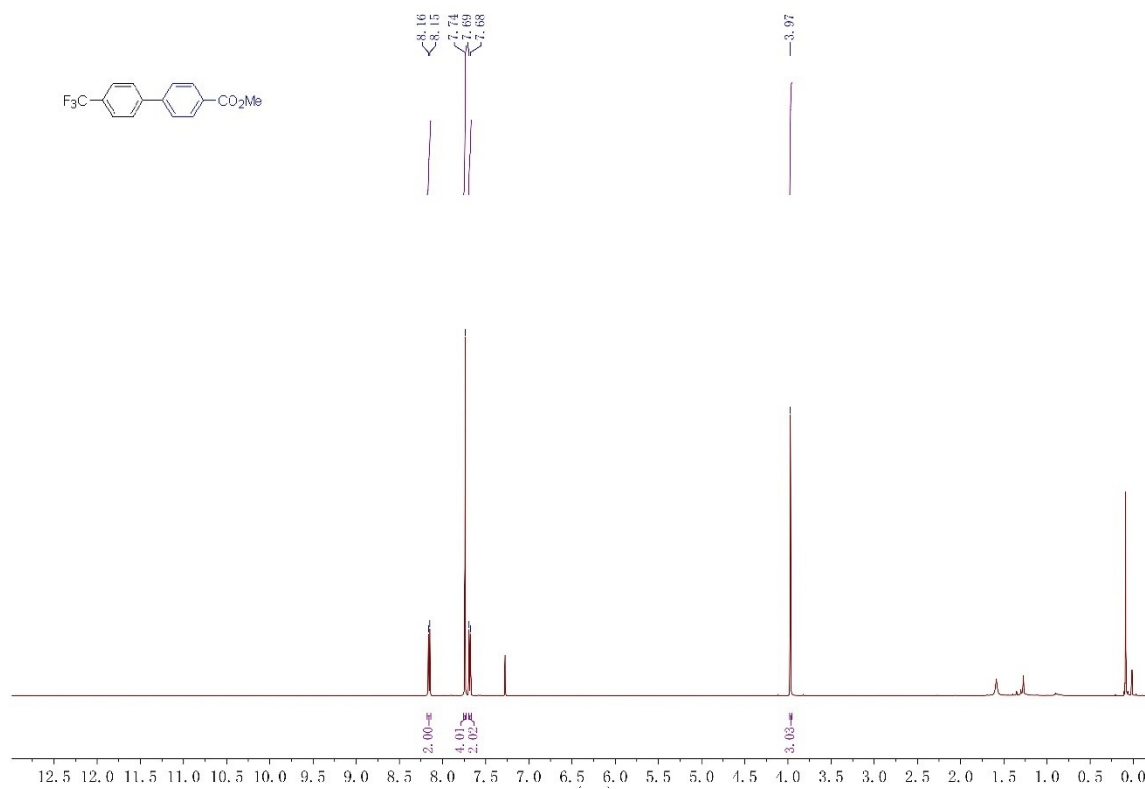

### <sup>13</sup>C NMR (126 MHz, CDCl<sub>3</sub>)

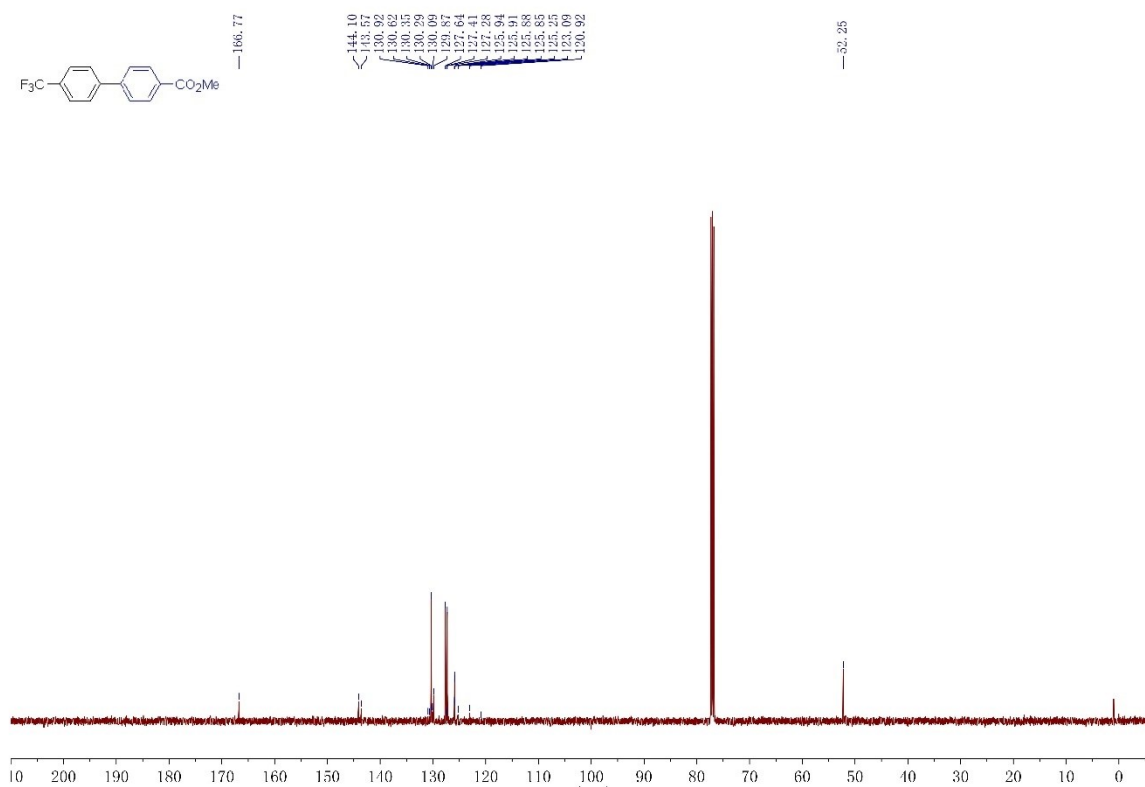

### <sup>19</sup>F NMR (565 MHz, CDCl<sub>3</sub>)

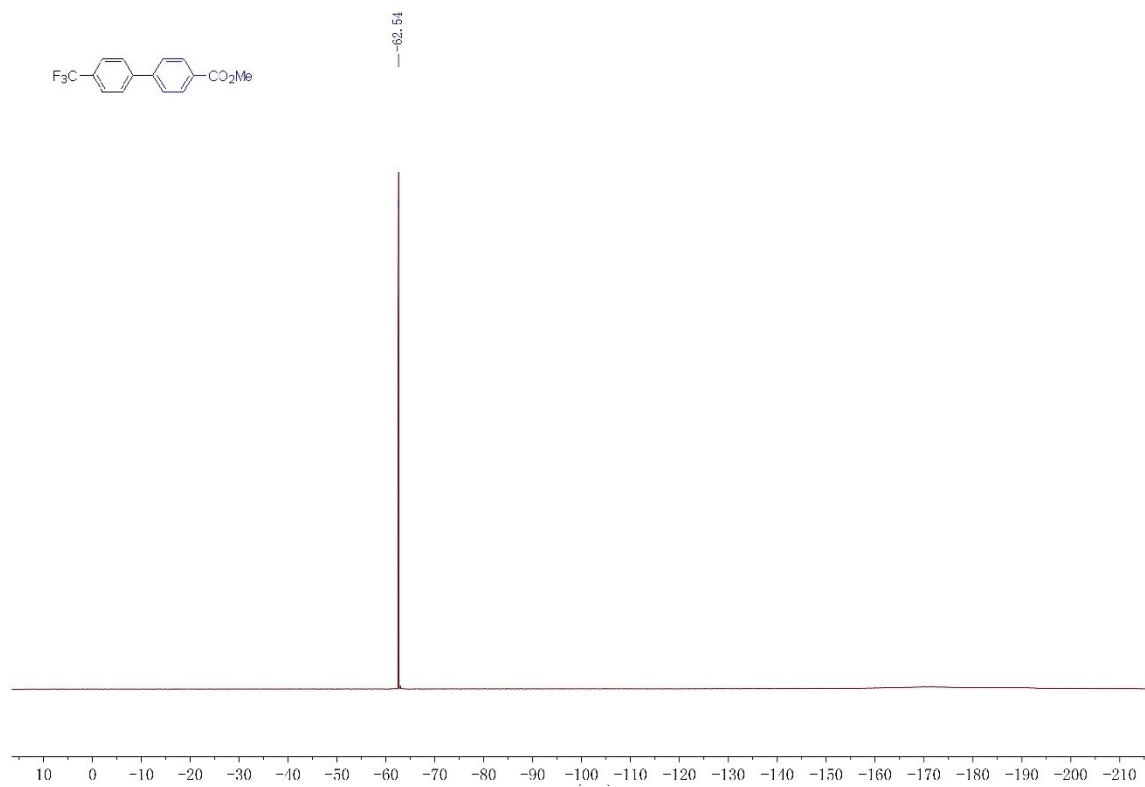

### <sup>1</sup>H NMR (500 MHz, CDCl<sub>3</sub>)

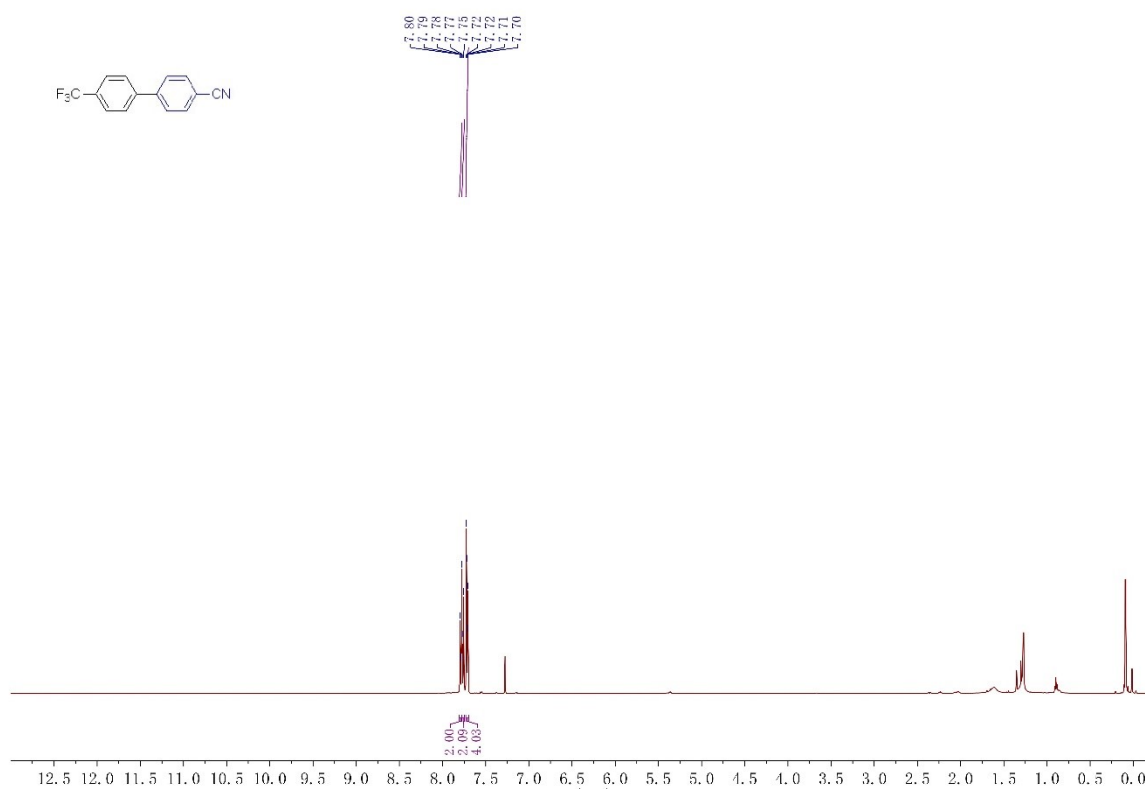

### <sup>13</sup>C NMR (126 MHz, CDCl<sub>3</sub>)

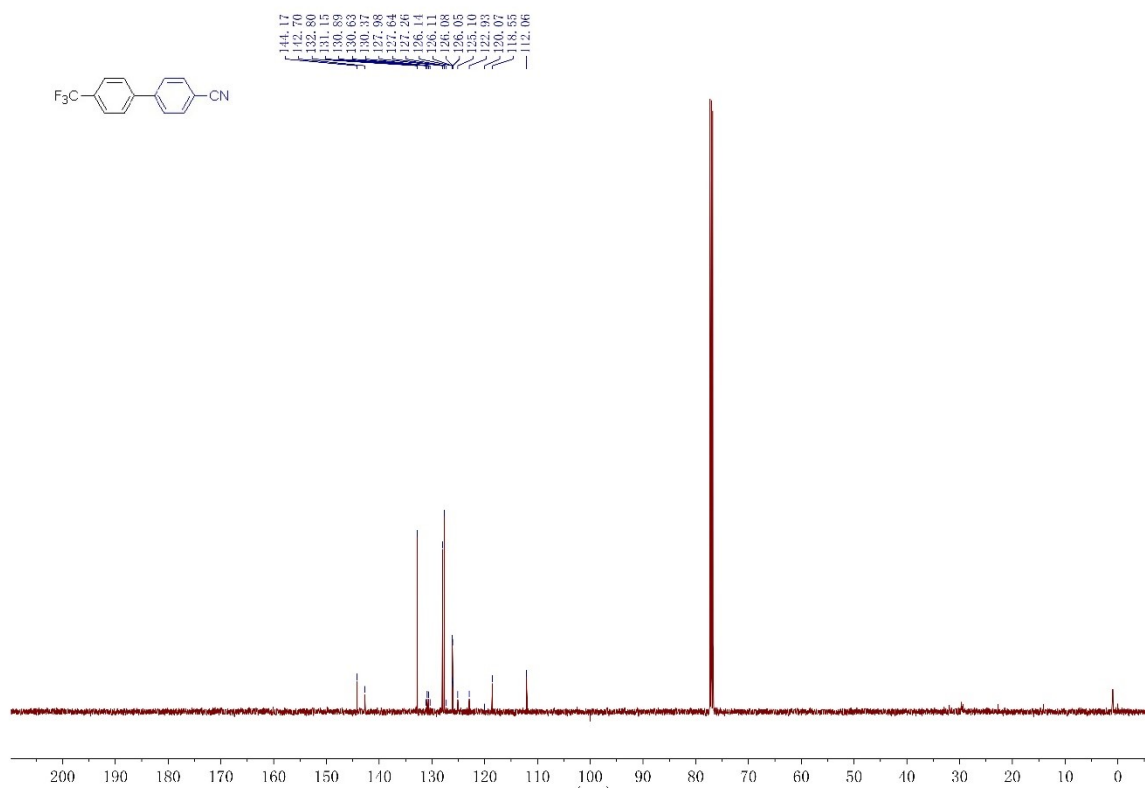

### $^{19}\text{F}$ NMR (565 MHz, $\text{CDCl}_3$ )

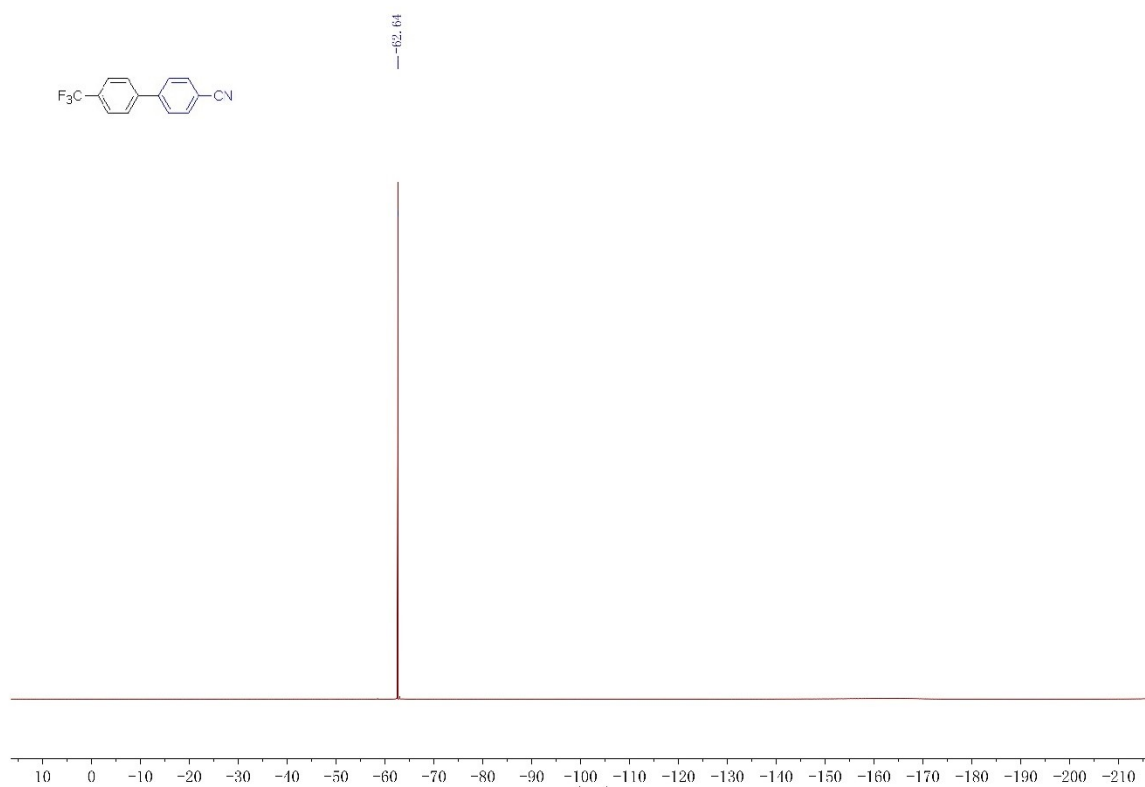

### $^1\text{H}$ NMR (500 MHz, $\text{CDCl}_3$ )

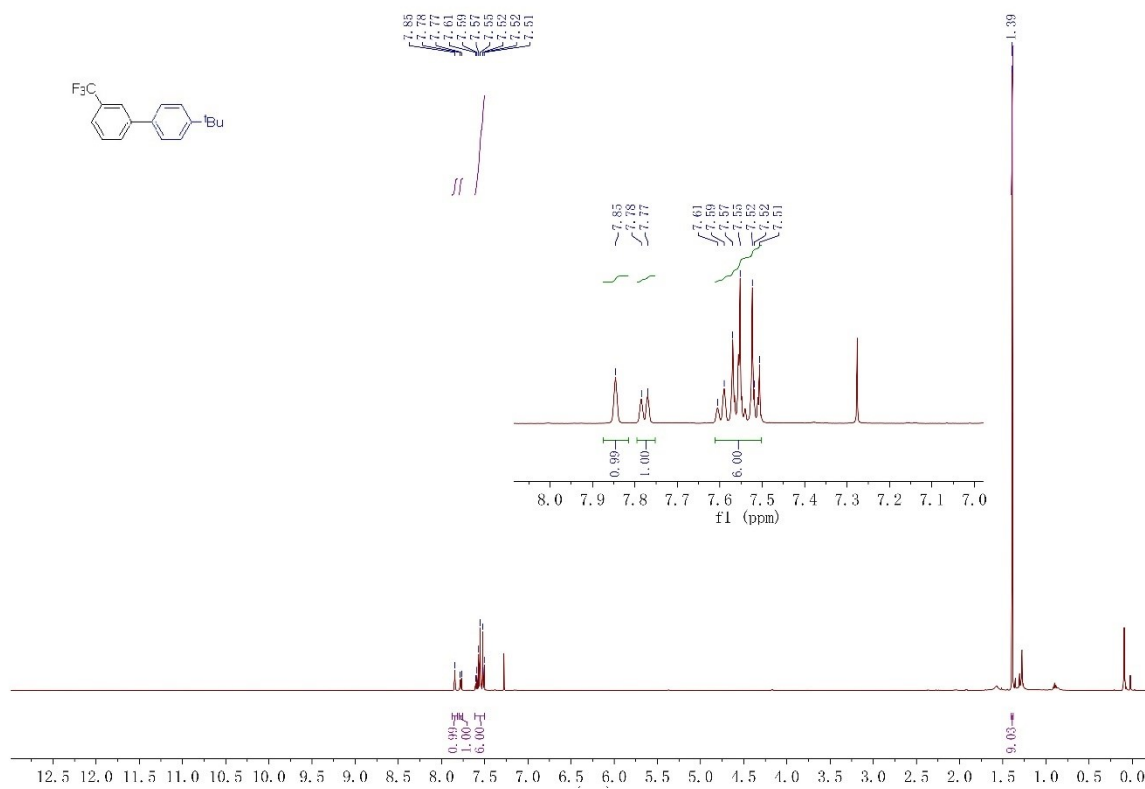



### <sup>13</sup>C NMR (126 MHz, CDCl<sub>3</sub>)

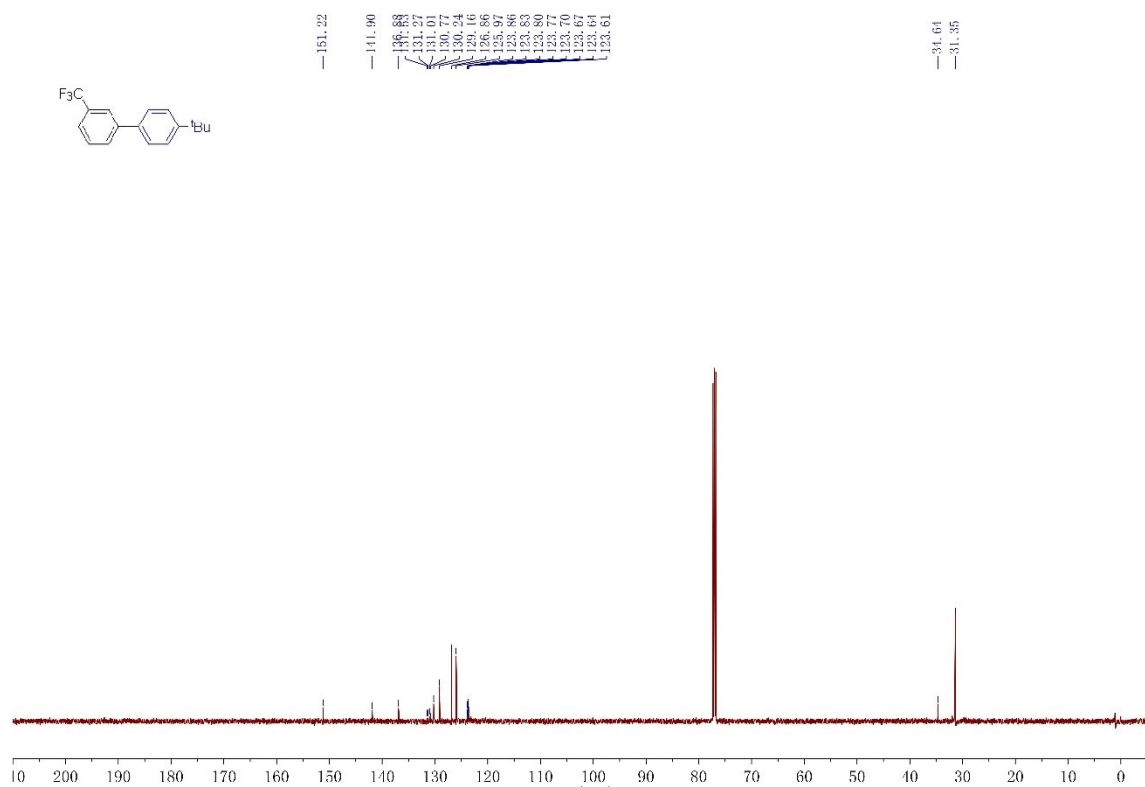

### <sup>19</sup>F NMR (565 MHz, CDCl<sub>3</sub>)

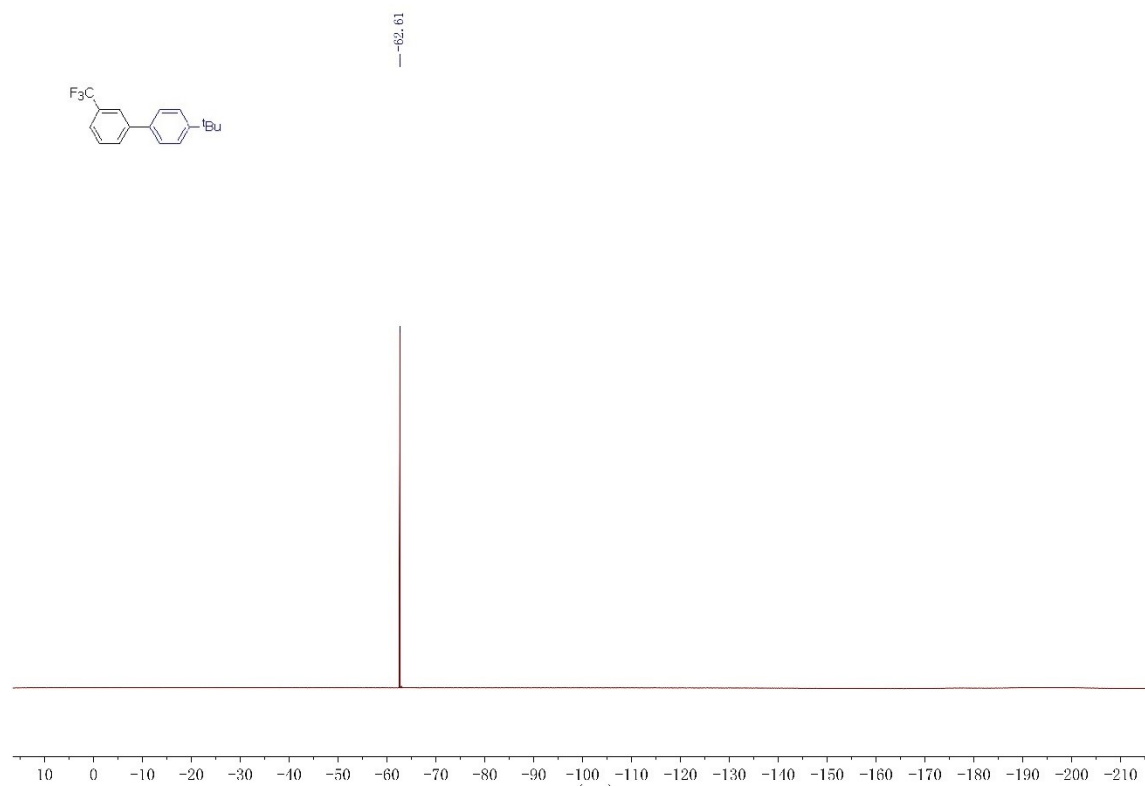

# <sup>1</sup>H NMR (500 MHz, CDCl<sub>3</sub>)

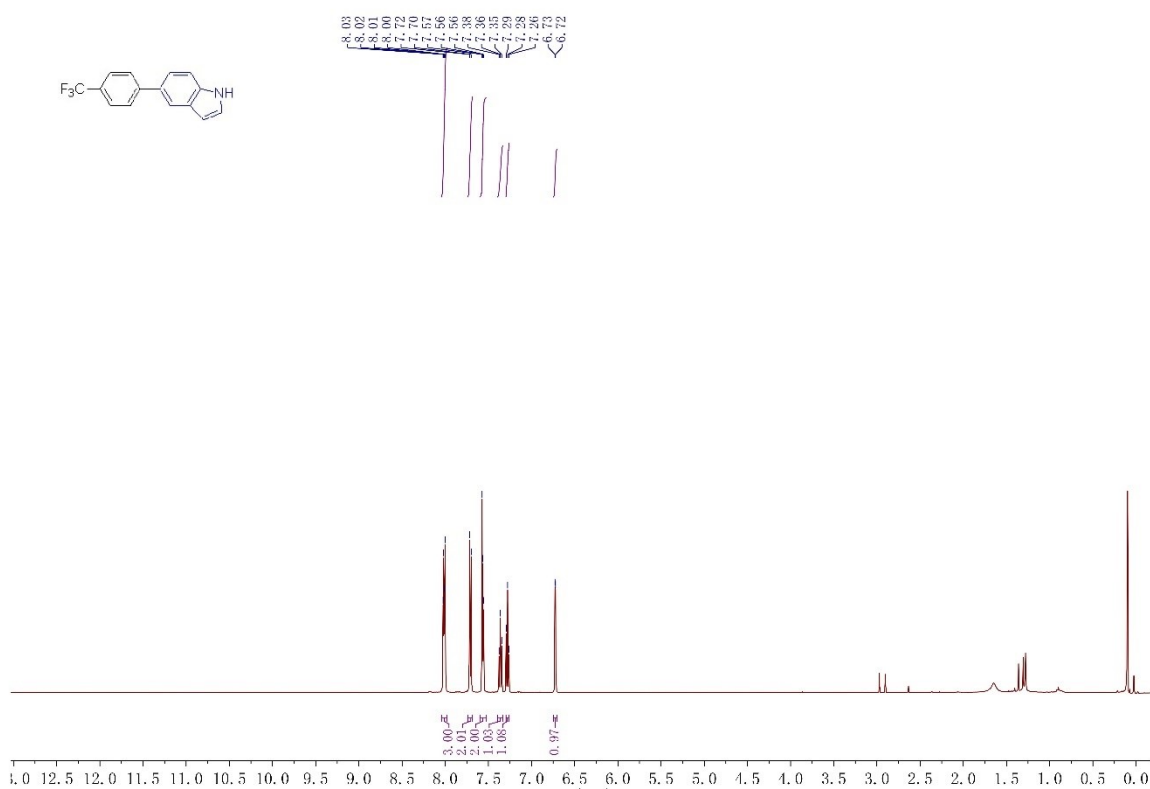

# <sup>13</sup>C NMR (126 MHz, CDCl<sub>3</sub>)

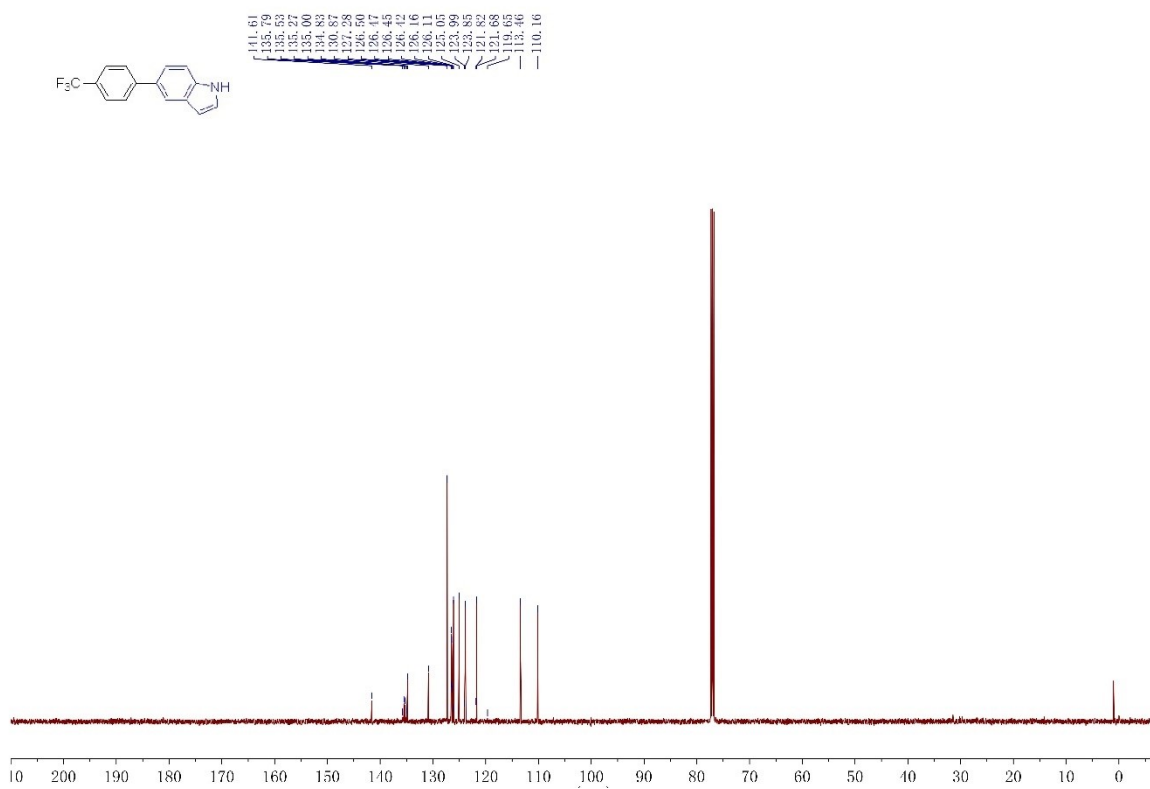

### $^{19}\text{F}$ NMR (565 MHz, $\text{CDCl}_3$ )

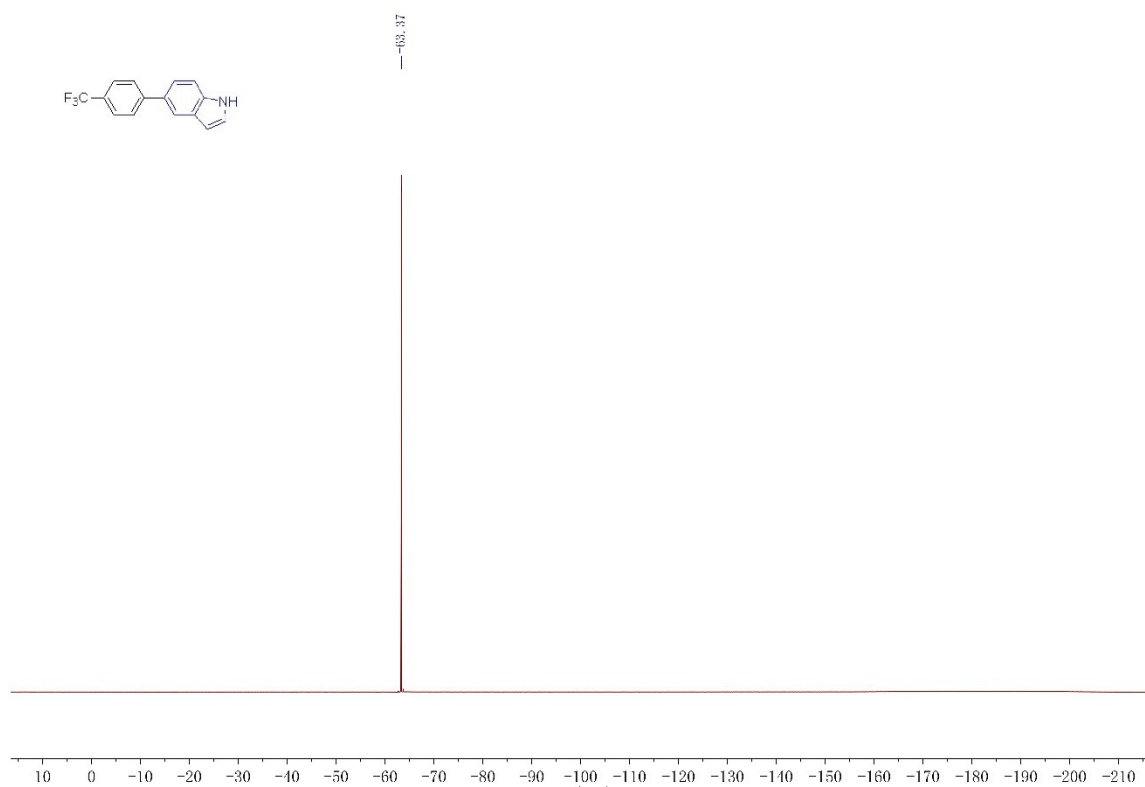

### $^1\text{H}$ NMR (500 MHz, $\text{CDCl}_3$ )

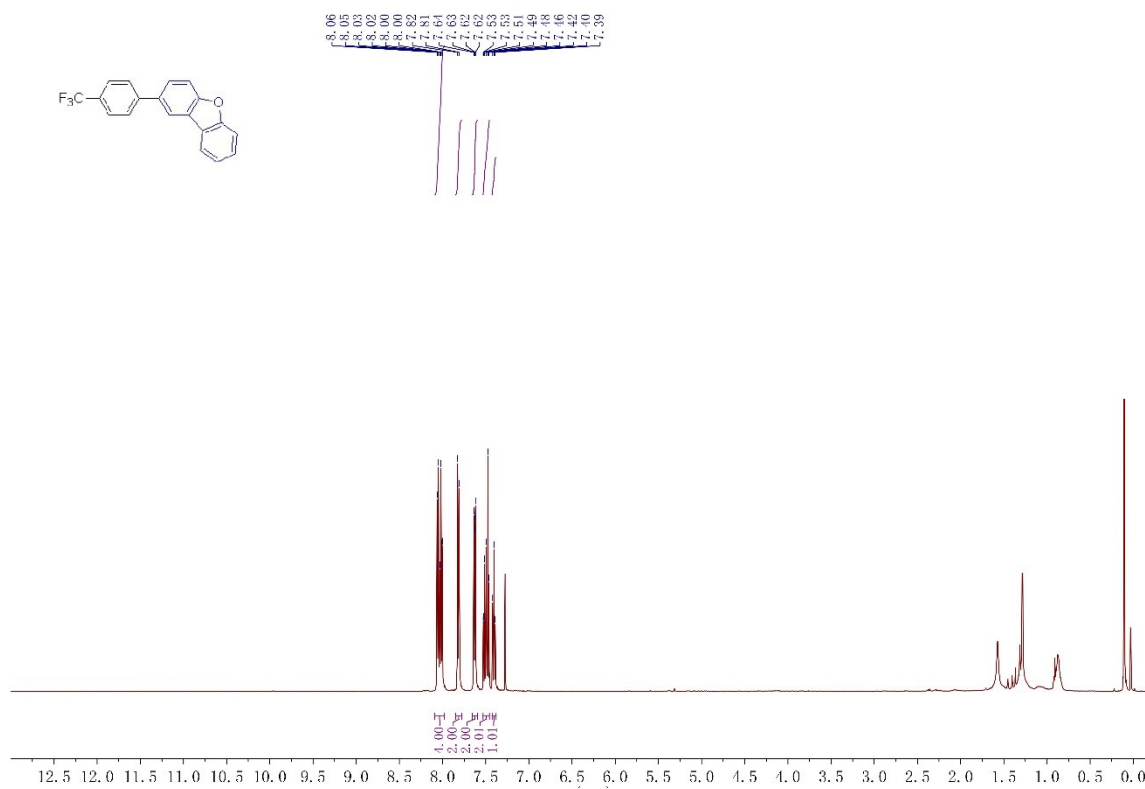

**<sup>13</sup>C NMR (126 MHz, CDCl<sub>3</sub>)**

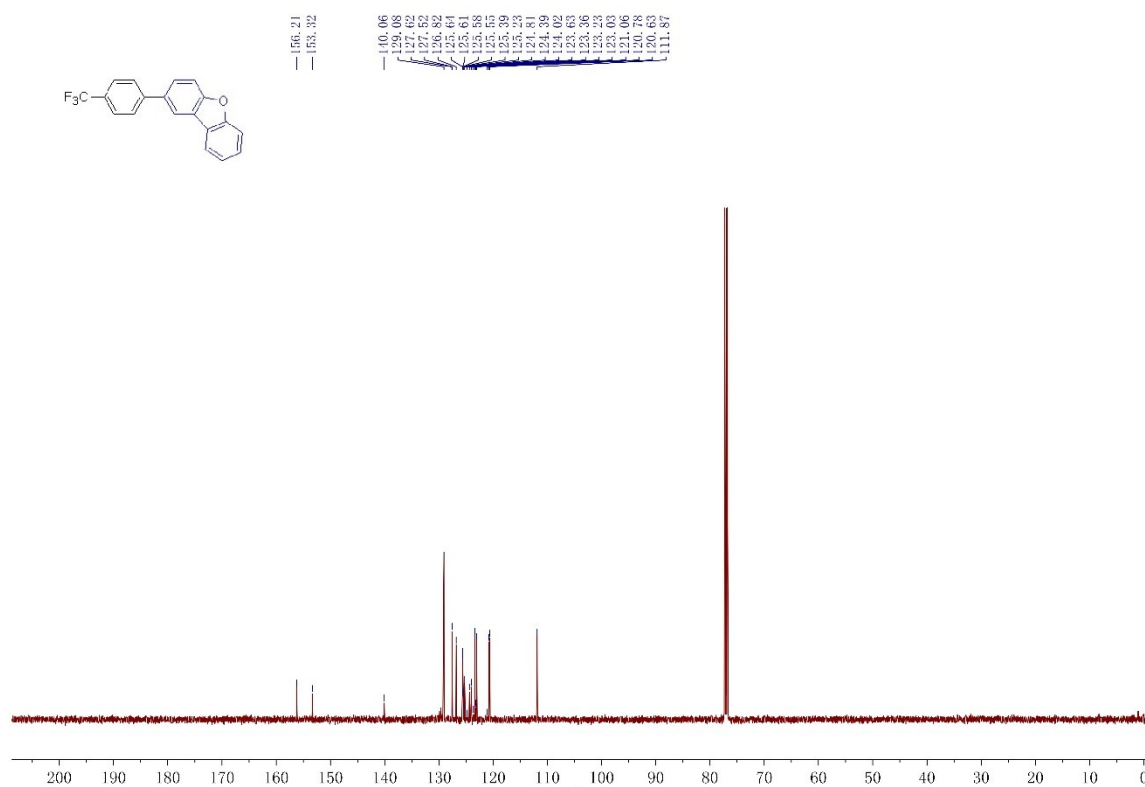

**<sup>19</sup>F NMR (565 MHz, CDCl<sub>3</sub>)**

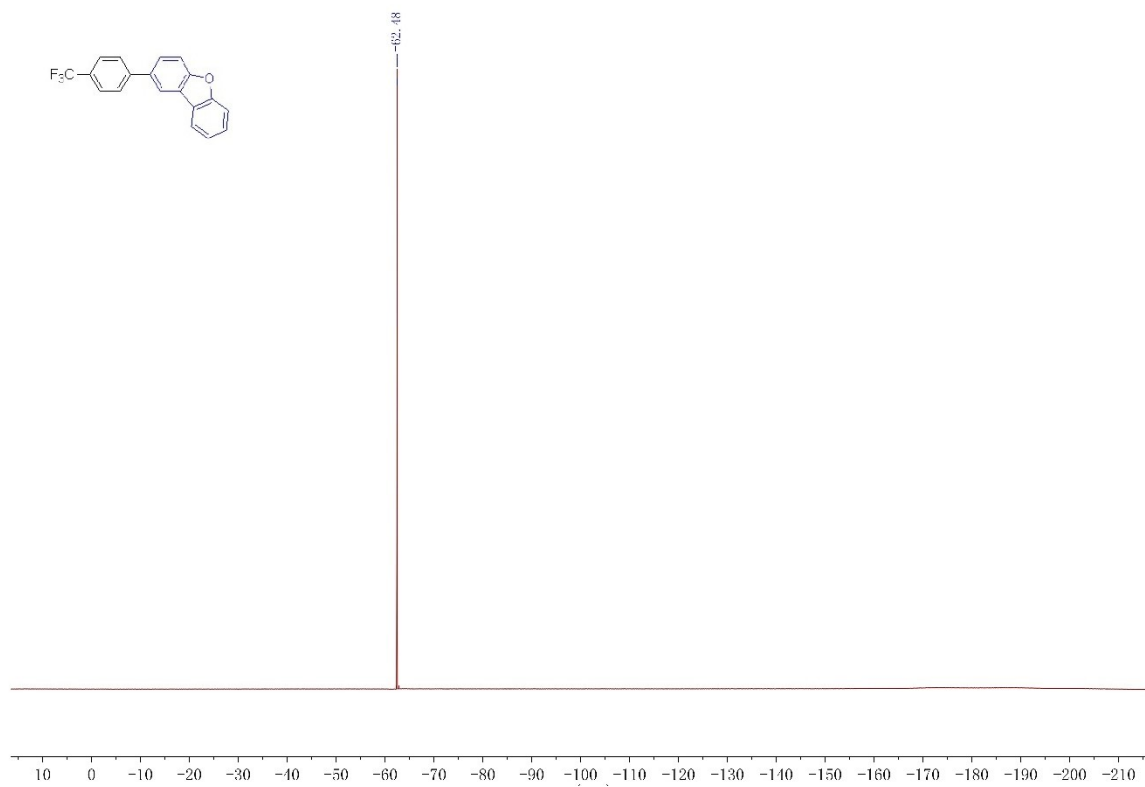

# <sup>1</sup>H NMR (500 MHz, CDCl<sub>3</sub>)

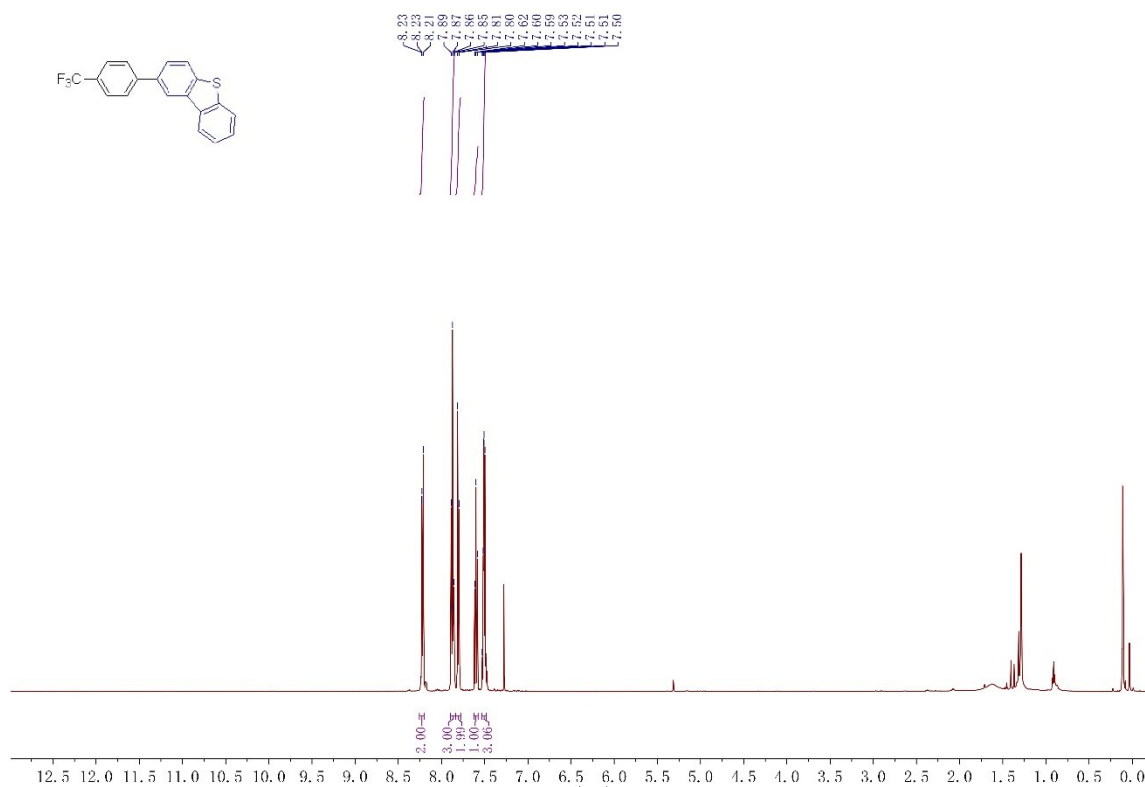

# <sup>13</sup>C NMR (126 MHz, CDCl<sub>3</sub>)

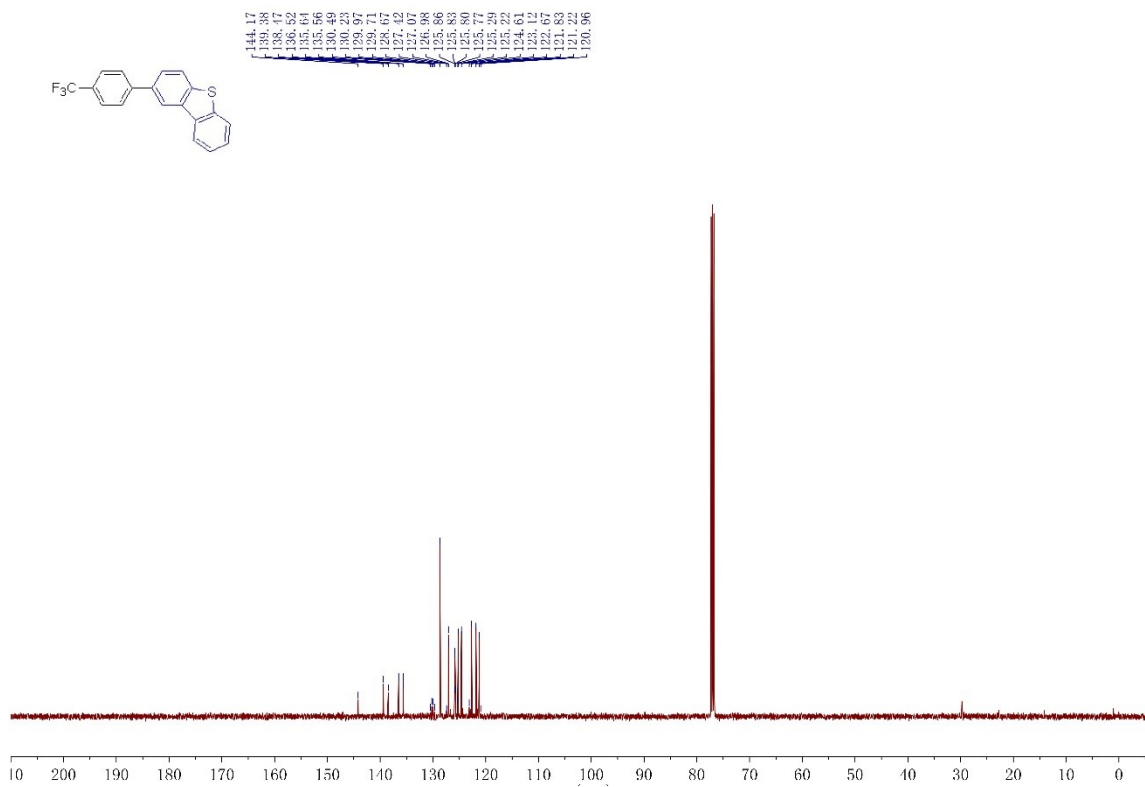

**<sup>19</sup>F NMR (565 MHz, CDCl<sub>3</sub>)**

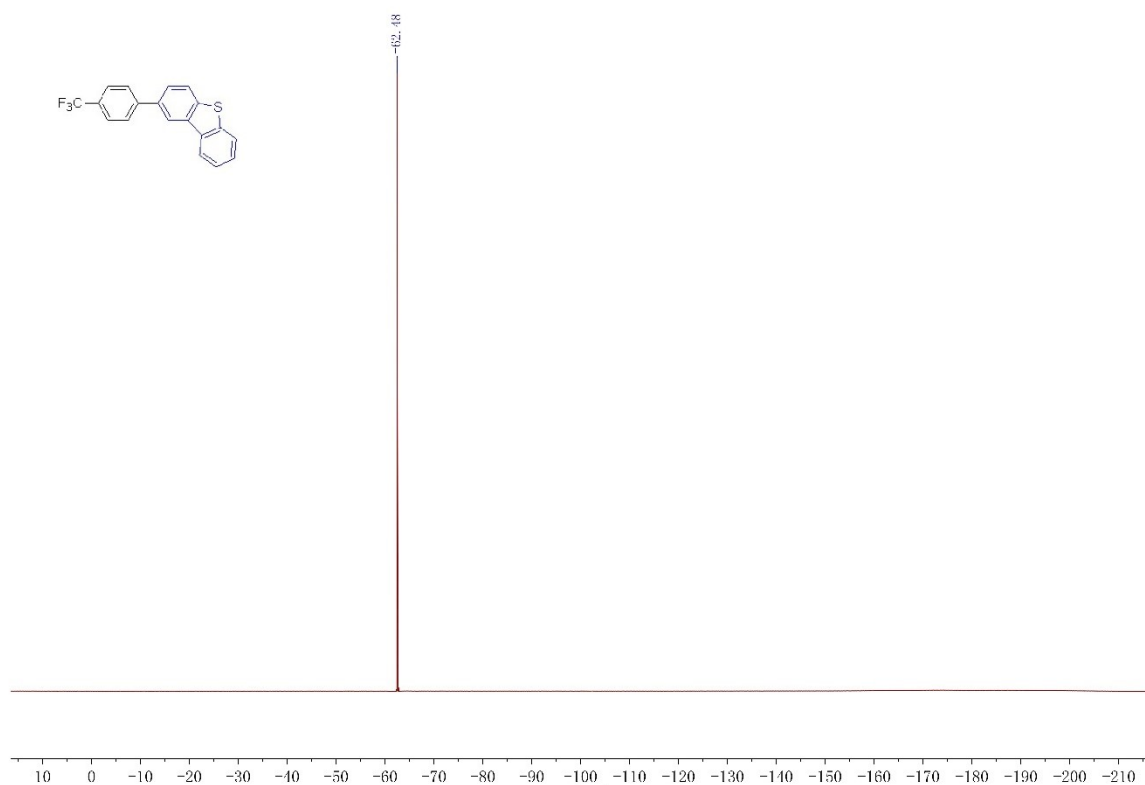

**<sup>1</sup>H NMR (500 MHz, CDCl<sub>3</sub>)**

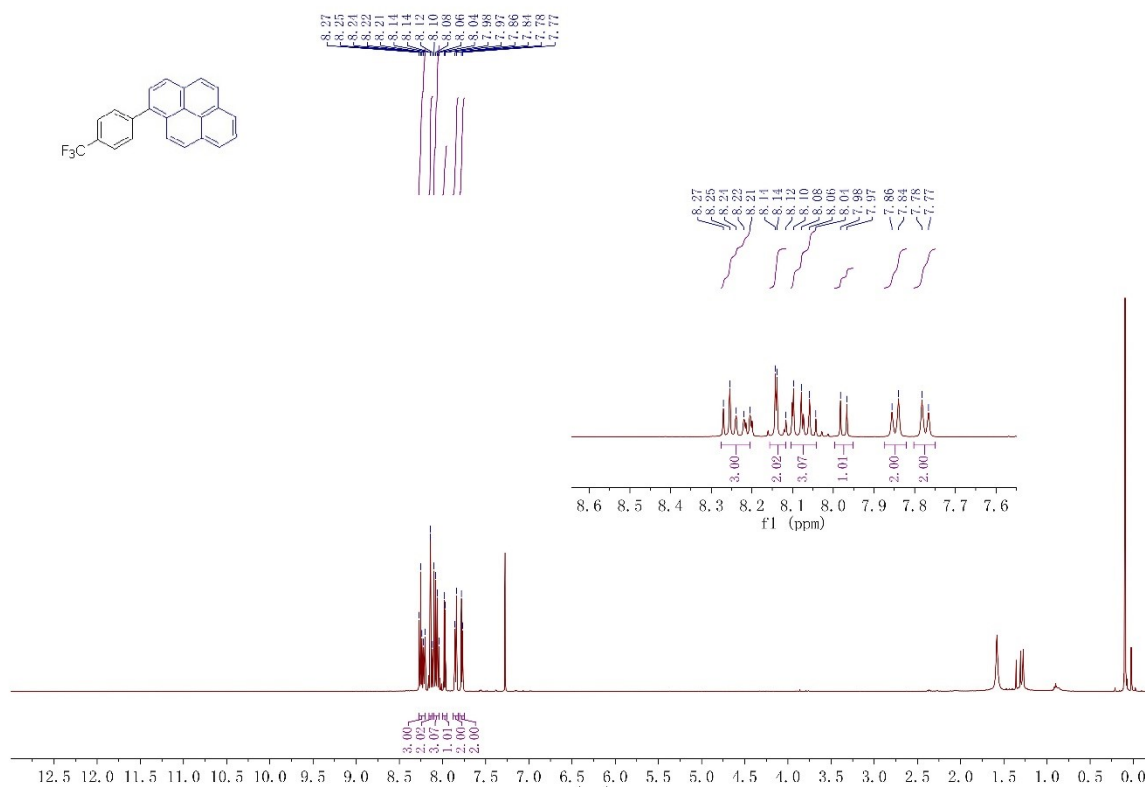

**<sup>13</sup>C NMR (126 MHz, CDCl<sub>3</sub>)**

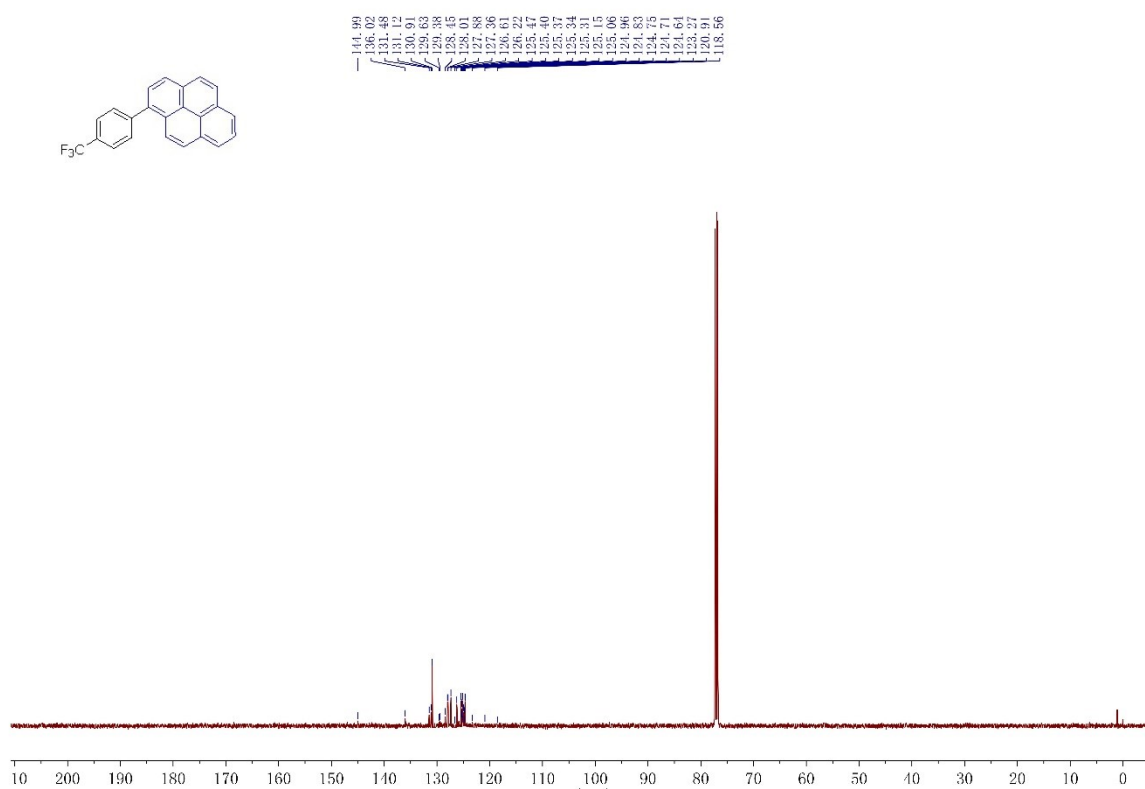

**<sup>19</sup>F NMR (565 MHz, CDCl<sub>3</sub>)**

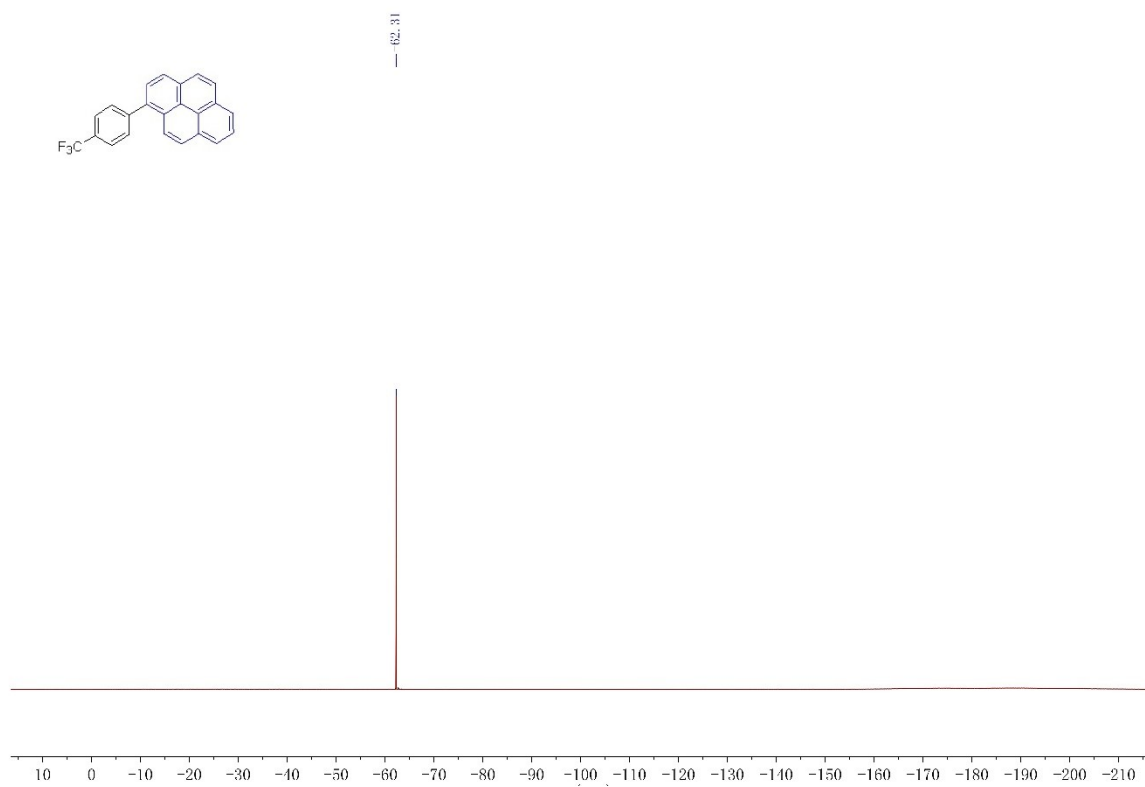

### $^1\text{H}$ NMR (500 MHz, $\text{CDCl}_3$ )

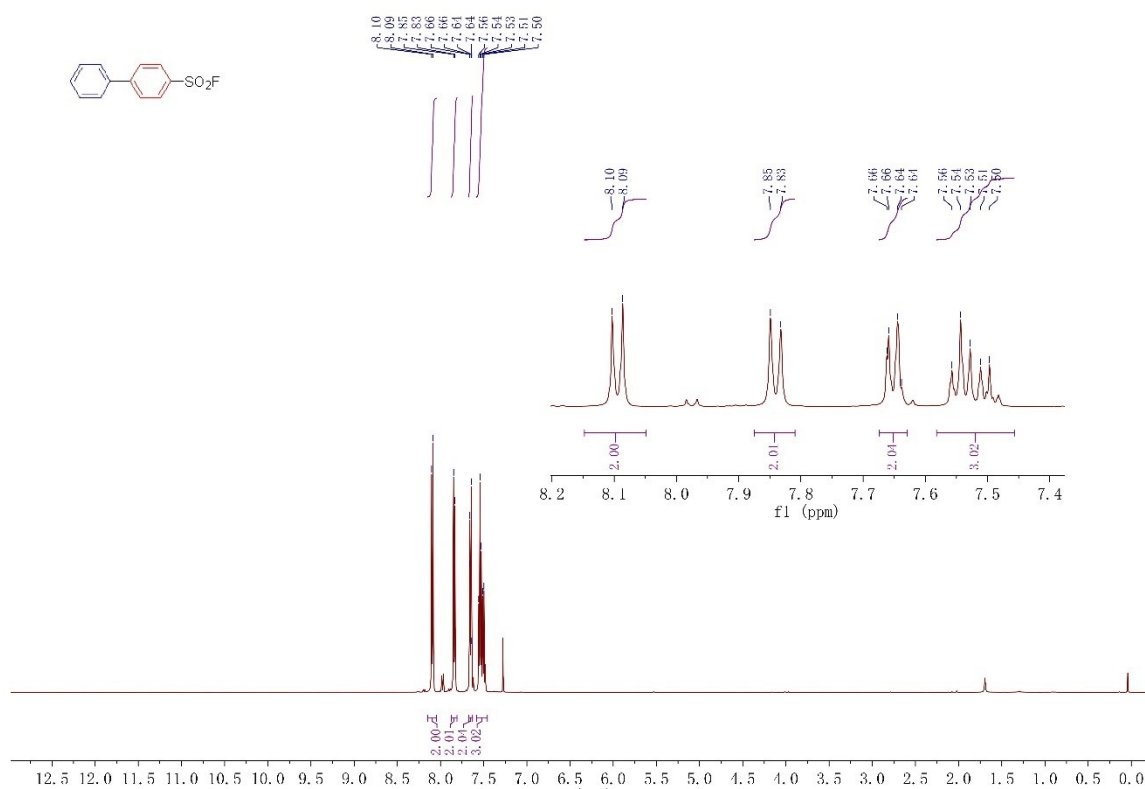

### $^{13}\text{C}$ NMR (126 MHz, $\text{CDCl}_3$ )

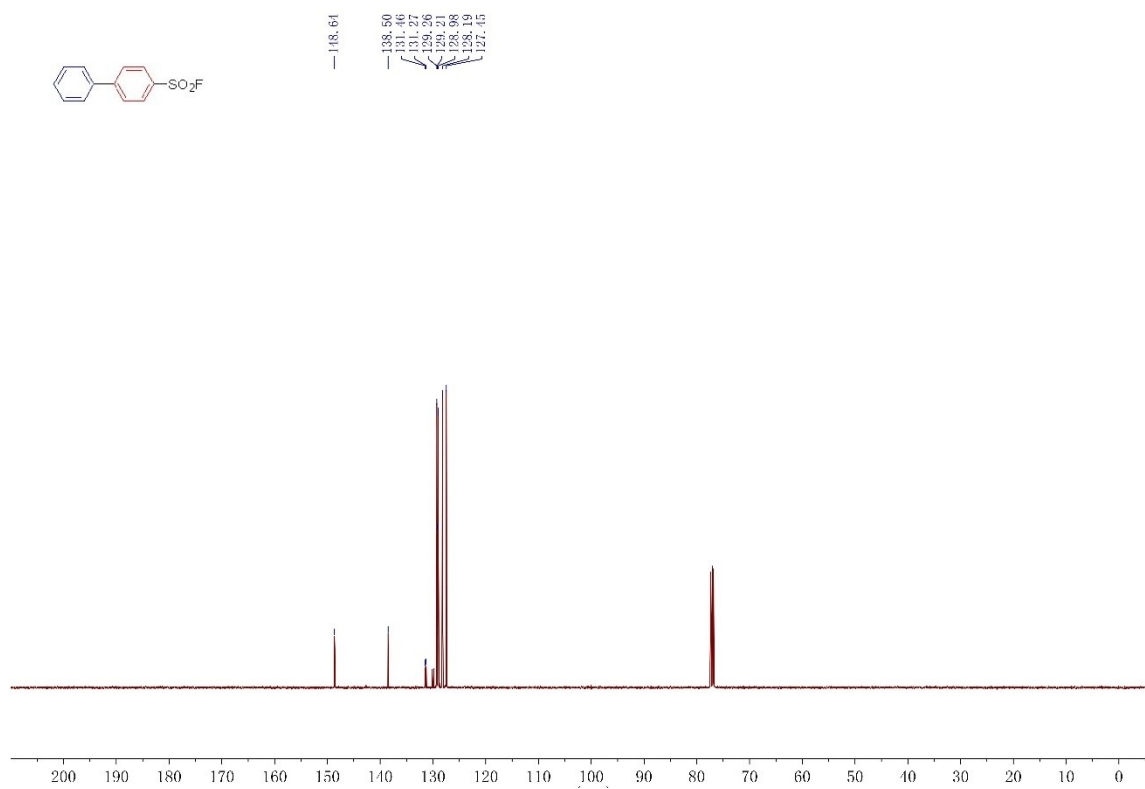



**<sup>19</sup>F NMR (565 MHz, CDCl<sub>3</sub>)**

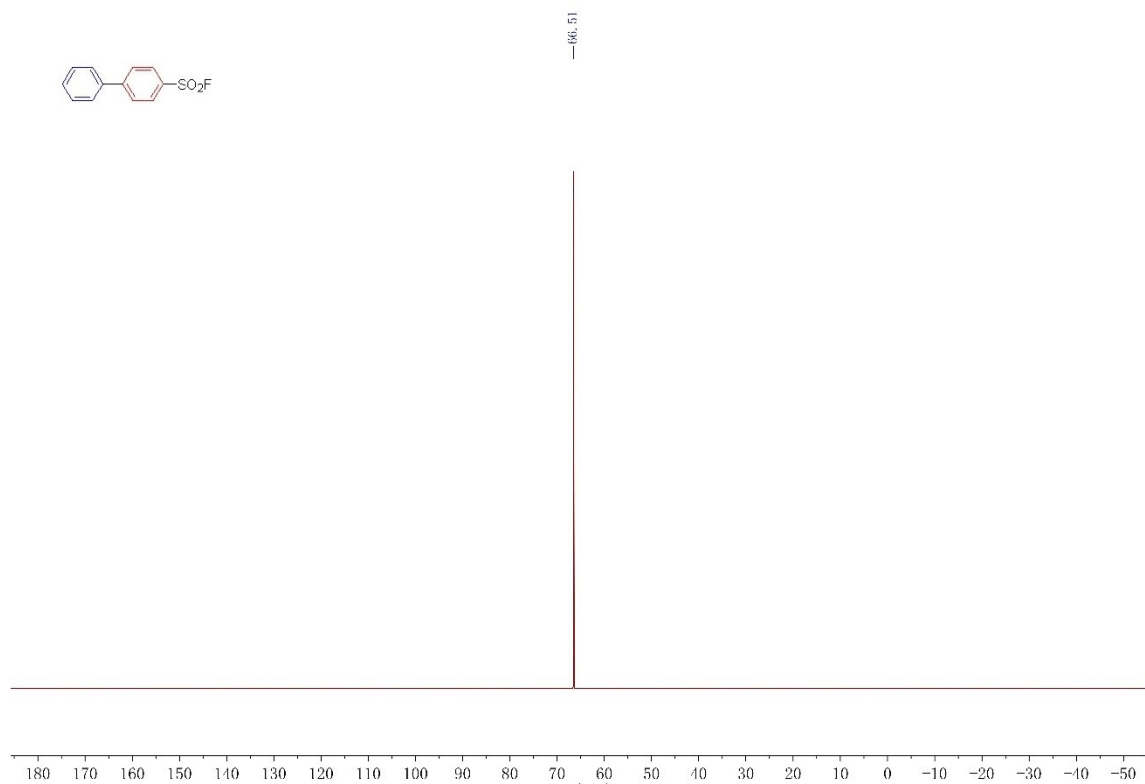

**<sup>1</sup>H NMR (500 MHz, CDCl<sub>3</sub>)**

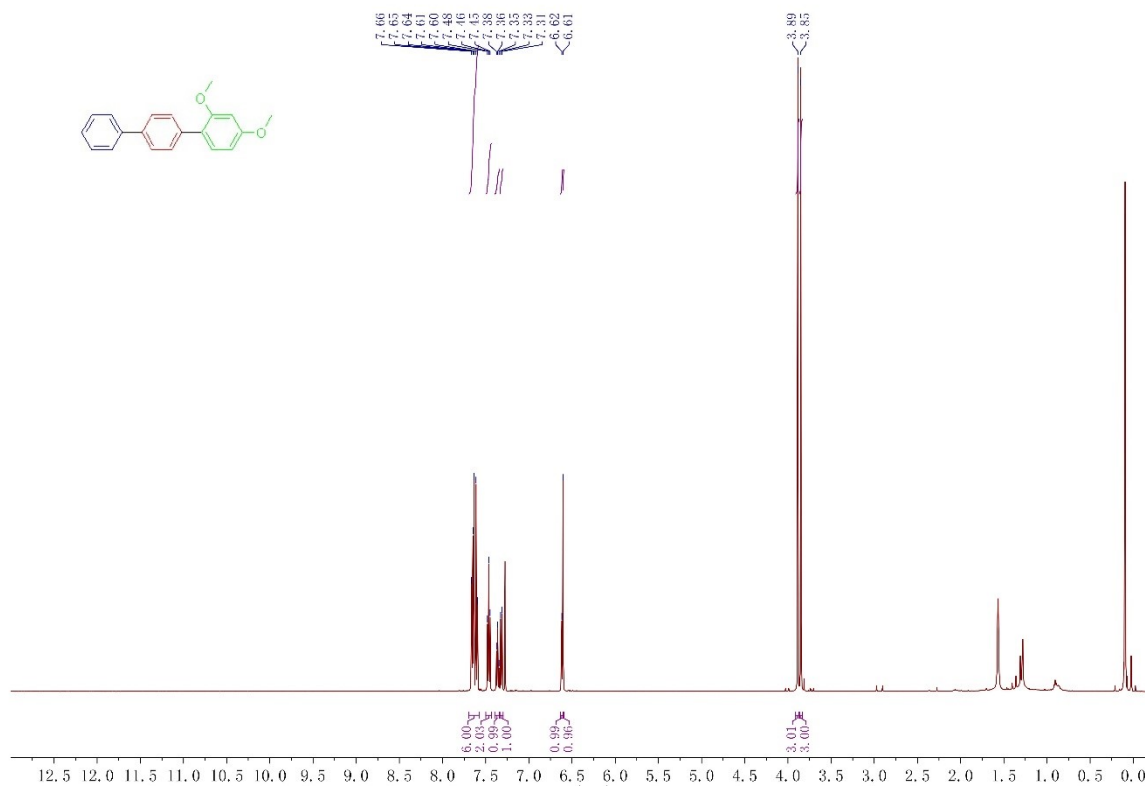

<sup>13</sup>C NMR (126 MHz, CDCl<sub>3</sub>)

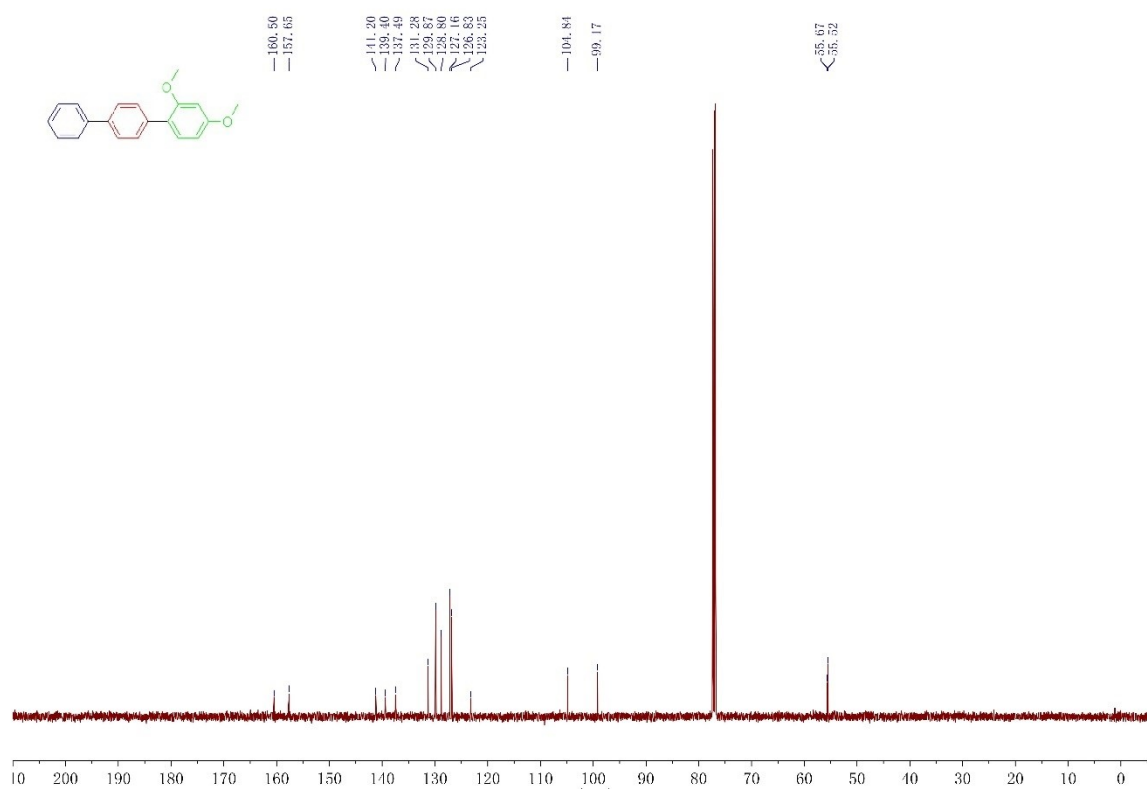

## 9. Table of Energies

Zero-point correction (ZPE), thermal correction to enthalpy (TCH), thermal correction to Gibbs free energy (TCG), energies (E), enthalpies (H), and Gibbs free energies (G) (in Hartree) of the structures calculated at the PBE0-D3BJ/6-311+G(d,p)/def2-TZVP//PBE0-D3BJ/6-31G(d)/def2-SVP/SMD (N,N-Dimethylformamide) level of theory.

**Table S11. Energies for all calculated species.**

| Structures           | ZPE      | tcH      | tcG       | E            | H            | G            | Imaginary Frequency |
|----------------------|----------|----------|-----------|--------------|--------------|--------------|---------------------|
| ArPh                 | 0.216580 | 0.228929 | 0.178610  | -576.947854  | -576.946910  | -576.997229  |                     |
| ArSO <sub>2</sub> F  | 0.137999 | 0.149736 | 0.100385  | -993.660753  | -993.659808  | -993.709159  |                     |
| B(OH) <sub>2</sub> F | 0.037103 | 0.042084 | 0.010799  | -276.169507  | -276.168563  | -276.199848  |                     |
| PhB(OH) <sub>2</sub> | 0.126277 | 0.135089 | 0.092818  | -407.667587  | -407.666643  | -407.708914  |                     |
| BSO <sub>2</sub> F   | 0.046692 | 0.055178 | 0.013485  | -824.433963  | -824.433019  | -824.474713  |                     |
| LPd                  | 0.679528 | 0.715931 | 0.611707  | -1785.329850 | -1785.328906 | -1785.433129 |                     |
| SO <sub>2</sub>      | 0.007028 | 0.011044 | -0.017171 | -548.266346  | -548.265402  | -548.293617  |                     |
| Int1                 | 0.818640 | 0.867524 | 0.733815  | -2779.038108 | -2779.037164 | -2779.170874 |                     |
| Ts1                  | 0.818200 | 0.866489 | 0.735508  | -2779.003322 | -2779.002378 | -2779.133359 | 51.21i              |
| Int2                 | 0.818392 | 0.867829 | 0.732860  | -2779.036416 | -2779.035472 | -2779.170441 |                     |
| Ts2                  | 0.947492 | 1.004156 | 0.857498  | -3186.708198 | -3186.707254 | -3186.853912 | 241.83i             |
| Int3                 | 0.896467 | 0.945201 | 0.814389  | -2362.266610 | -2362.265666 | -2362.396477 |                     |
| Ts3                  | 0.895410 | 0.944661 | 0.809758  | -2362.258645 | -2362.257701 | -2362.392603 | 298.14i             |

|             |          |          |          |              |              |              |         |
|-------------|----------|----------|----------|--------------|--------------|--------------|---------|
| <b>Ts4</b>  | 0.817763 | 0.866641 | 0.731075 | -2778.990619 | -2778.989674 | -2779.125240 | 106.01i |
| <b>Int4</b> | 0.819982 | 0.868667 | 0.737361 | -2779.046586 | -2779.045642 | -2779.176948 |         |
| <b>Ts5</b>  | 0.818203 | 0.866852 | 0.735731 | -2779.003357 | -2779.002412 | -2779.133532 | 48.79i  |
| <b>Int5</b> | 0.808477 | 0.853966 | 0.729878 | -2230.737494 | -2230.736550 | -2230.860638 |         |
| <b>Ts6</b>  | 0.937677 | 0.990946 | 0.852133 | -2638.423963 | -2638.423019 | -2638.561832 | 74.24i  |

---

## 10. Cartesian Coordinates of the Structures

### ArPh

|   |          |          |          |
|---|----------|----------|----------|
| C | 0.14887  | 0.0862   | -0.02947 |
| C | -0.5041  | 1.27327  | -0.39519 |
| C | -0.64621 | -1.00947 | 0.31264  |
| C | -1.88456 | 1.35892  | -0.41741 |
| H | 0.08567  | 2.13609  | -0.69286 |
| C | -2.03648 | -0.94106 | 0.29548  |
| H | -0.1708  | -1.93458 | 0.62775  |
| C | -2.66415 | 0.25026  | -0.07144 |
| H | -2.38861 | 2.27445  | -0.71102 |
| H | -2.61398 | -1.81365 | 0.58001  |
| O | -4.00664 | 0.43117  | -0.12302 |
| C | -4.82576 | -0.66273 | 0.21355  |
| H | -4.66025 | -0.98787 | 1.24927  |
| H | -5.85428 | -0.31426 | 0.10684  |
| H | -4.6608  | -1.51376 | -0.46057 |
| C | 1.62267  | 0.00108  | -0.00533 |
| C | 2.28345  | -1.16483 | -0.41281 |
| C | 2.39833  | 1.0846   | 0.4265   |
| C | 3.67086  | -1.24656 | -0.38565 |
| H | 1.7004   | -2.00525 | -0.7802  |
| C | 3.78601  | 1.00578  | 0.44914  |
| H | 1.90349  | 1.98811  | 0.77298  |
| C | 4.42919  | -0.16092 | 0.04445  |
| H | 4.16247  | -2.15882 | -0.71311 |
| H | 4.3674   | 1.85645  | 0.79479  |
| H | 5.51367  | -0.22338 | 0.0635   |

### ArSO<sub>2</sub>F

|   |          |          |         |
|---|----------|----------|---------|
| C | -0.51707 | 0.05795  | 0.08122 |
| C | 0.06451  | 1.32861  | 0.05627 |
| C | 0.26325  | -1.09302 | 0.07533 |
| C | 1.44023  | 1.4375   | 0.01785 |
| H | -0.56449 | 2.21237  | 0.08014 |
| C | 1.64724  | -0.9834  | 0.03755 |
| H | -0.21231 | -2.06766 | 0.11258 |
| C | 2.24032  | 0.28448  | 0.00526 |
| H | 1.9295   | 2.40562  | 0.00239 |
| H | 2.25029  | -1.88365 | 0.03884 |
| S | -2.25975 | -0.08951 | 0.12433 |

|   |          |          |          |
|---|----------|----------|----------|
| O | -2.63912 | -1.4012  | 0.59312  |
| O | -2.85069 | 1.12301  | 0.63838  |
| F | -2.58284 | -0.08767 | -1.45181 |
| O | 3.56691  | 0.50044  | -0.03186 |
| C | 4.4258   | -0.62068 | -0.04273 |
| H | 4.25299  | -1.24718 | -0.9265  |
| H | 5.43912  | -0.2195  | -0.07633 |
| H | 4.30394  | -1.22551 | 0.86433  |

### **B(OH)<sub>2</sub>F**

|   |          |          |          |
|---|----------|----------|----------|
| B | 0.01519  | 0.02077  | 0.00001  |
| O | -0.69434 | -1.14387 | 0.00003  |
| H | -1.64444 | -0.97737 | -0.00026 |
| O | 1.36956  | 0.0168   | -0.00005 |
| H | 1.70574  | -0.88744 | 0.00025  |
| F | -0.61545 | 1.1975   | 0.00002  |

### **PhB(OH)<sub>2</sub>**

|   |          |          |          |
|---|----------|----------|----------|
| B | -1.74292 | -0.00196 | -0.00596 |
| O | -2.51699 | 1.11899  | 0.14791  |
| H | -1.99052 | 1.91009  | 0.30682  |
| O | -2.38281 | -1.19715 | -0.15668 |
| H | -3.33973 | -1.07116 | -0.11257 |
| C | -0.17762 | 0.01166  | -0.00936 |
| C | 0.56151  | 1.19913  | -0.08555 |
| C | 0.53118  | -1.19519 | 0.07033  |
| C | 1.9523   | 1.19089  | -0.07824 |
| H | 0.05158  | 2.15901  | -0.16985 |
| C | 1.92152  | -1.21453 | 0.08229  |
| H | -0.02592 | -2.12657 | 0.12358  |
| C | 2.63443  | -0.01998 | 0.00889  |
| H | 2.50426  | 2.12479  | -0.14241 |
| H | 2.45228  | -2.16073 | 0.14736  |
| H | 3.72121  | -0.0322  | 0.01692  |

### **BSO<sub>2</sub>F**

|   |         |          |          |
|---|---------|----------|----------|
| B | 1.46039 | 0.09407  | 0.0565   |
| O | 2.56658 | 0.763    | -0.35705 |
| H | 2.34563 | 1.63258  | -0.71352 |
| O | 1.5304  | -1.15523 | 0.58074  |
| H | 2.43833 | -1.48278 | 0.58994  |

|   |          |          |          |
|---|----------|----------|----------|
| S | -1.15616 | -0.08803 | 0.35938  |
| O | -2.21078 | 0.88971  | 0.20182  |
| O | 0.2194   | 0.72402  | -0.04841 |
| F | -1.15912 | -0.99819 | -0.99176 |

## LPd

|   |          |          |          |
|---|----------|----------|----------|
| C | 1.01485  | 0.26738  | 1.52404  |
| C | 1.56278  | 0.39557  | 2.80067  |
| C | 0.77826  | 0.27555  | 3.94302  |
| C | -0.58363 | 0.03518  | 3.8105   |
| C | -1.14585 | -0.08102 | 2.54286  |
| C | -0.37525 | 0.03296  | 1.38064  |
| C | 1.87491  | 0.43117  | 0.32235  |
| C | 1.86823  | 1.71342  | -0.31672 |
| C | 2.41926  | 1.85539  | -1.62127 |
| C | 3.04244  | 0.73239  | -2.21409 |
| C | 3.13424  | -0.47891 | -1.55239 |
| C | 2.53131  | -0.62891 | -0.2895  |
| H | 2.62315  | 0.61434  | 2.89058  |
| H | 1.22832  | 0.37855  | 4.92654  |
| H | -1.21427 | -0.06149 | 4.69021  |
| H | -2.20937 | -0.26592 | 2.46485  |
| H | 2.54338  | 2.83803  | -2.06471 |
| H | 3.49501  | 0.8471   | -3.19536 |
| H | 3.6131   | -1.3388  | -2.00844 |
| O | 2.46085  | -1.88039 | 0.26819  |
| C | 3.39502  | -2.16398 | 1.3195   |
| C | 4.70438  | -2.65465 | 0.72624  |
| C | 2.72903  | -3.17761 | 2.22602  |
| H | 3.57321  | -1.2369  | 1.87925  |
| H | 5.1349   | -1.89761 | 0.0626   |
| H | 5.43212  | -2.87223 | 1.51593  |
| H | 4.5356   | -3.56882 | 0.14634  |
| H | 1.81311  | -2.7573  | 2.65202  |
| H | 2.46925  | -4.07893 | 1.65999  |
| H | 3.39899  | -3.46353 | 3.04374  |
| O | 1.54585  | 2.74655  | 0.50328  |
| C | 1.04013  | 3.96111  | -0.05722 |
| C | 2.15042  | 4.99532  | -0.12857 |
| C | -0.11078 | 4.38999  | 0.83208  |
| H | 0.65058  | 3.73675  | -1.06217 |
| H | 2.98351  | 4.64734  | -0.74701 |
| H | 1.77511  | 5.93388  | -0.55083 |

|    |          |          |          |
|----|----------|----------|----------|
| H  | 2.53708  | 5.19897  | 0.87607  |
| H  | -0.88007 | 3.61264  | 0.84546  |
| H  | 0.24156  | 4.54726  | 1.85725  |
| H  | -0.55413 | 5.3228   | 0.4676   |
| P  | -1.10212 | -0.10179 | -0.31849 |
| Pd | 0.1718   | 1.23759  | -1.6681  |
| C  | -2.95709 | 0.07221  | -0.18339 |
| C  | -3.83049 | -1.00432 | 0.47252  |
| C  | -3.29859 | 1.47862  | 0.32722  |
| H  | -3.21646 | 0.0638   | -1.25497 |
| C  | -5.3137  | -0.67118 | 0.30048  |
| H  | -3.61303 | -1.10088 | 1.54244  |
| H  | -3.62092 | -1.98216 | 0.02798  |
| C  | -4.78645 | 1.78319  | 0.17255  |
| H  | -3.01633 | 1.56992  | 1.38481  |
| H  | -2.69616 | 2.21466  | -0.22089 |
| C  | -5.64569 | 0.71545  | 0.84403  |
| H  | -5.92572 | -1.43587 | 0.795    |
| H  | -5.56799 | -0.70891 | -0.7692  |
| H  | -5.01033 | 2.77399  | 0.58712  |
| H  | -5.03549 | 1.82572  | -0.89796 |
| H  | -6.71097 | 0.9357   | 0.70247  |
| H  | -5.46247 | 0.73228  | 1.92888  |
| C  | -0.72811 | -1.87427 | -0.75695 |
| C  | -0.85972 | -2.92336 | 0.34761  |
| C  | -1.45579 | -2.29606 | -2.03611 |
| H  | 0.34052  | -1.8142  | -1.00326 |
| C  | -0.33951 | -4.27061 | -0.15137 |
| H  | -1.90615 | -3.0289  | 0.66221  |
| H  | -0.2905  | -2.60613 | 1.22677  |
| C  | -0.94626 | -3.65371 | -2.51756 |
| H  | -2.53793 | -2.36284 | -1.85232 |
| H  | -1.3104  | -1.53399 | -2.81313 |
| C  | -1.06027 | -4.71265 | -1.4231  |
| H  | -0.44674 | -5.0301  | 0.63376  |
| H  | 0.73602  | -4.17157 | -0.35575 |
| H  | -1.49677 | -3.96636 | -3.41387 |
| H  | 0.10807  | -3.55116 | -2.81258 |
| H  | -0.65944 | -5.6704  | -1.77816 |
| H  | -2.12364 | -4.88233 | -1.19543 |

## SO<sub>2</sub>

|   |    |    |         |
|---|----|----|---------|
| S | 0. | 0. | 0.36915 |
|---|----|----|---------|



|   |    |          |          |
|---|----|----------|----------|
| O | 0. | -1.25299 | -0.36915 |
| O | 0. | 1.25299  | -0.36915 |

### Int1

|   |          |          |         |
|---|----------|----------|---------|
| C | -0.90733 | 0.76585  | 2.32827 |
| C | -1.08732 | 1.27217  | 3.62161 |
| C | -1.99311 | 2.29227  | 3.88025 |
| C | -2.74462 | 2.8263   | 2.8375  |
| C | -2.56552 | 2.34327  | 1.54693 |
| C | -1.64666 | 1.32201  | 1.26603 |
| C | 0.04458  | -0.37317 | 2.18166 |
| C | 1.42365  | -0.1763  | 2.41295 |
| C | 2.2905   | -1.27031 | 2.48081 |
| C | 1.79906  | -2.55589 | 2.27041 |
| C | 0.45695  | -2.77309 | 1.99251 |
| C | -0.41922 | -1.68377 | 1.96318 |
| H | -0.49953 | 0.84824  | 4.43127 |
| H | -2.11471 | 2.66574  | 4.89328 |
| H | -3.46388 | 3.61861  | 3.02603 |
| H | -3.15283 | 2.76729  | 0.74056 |
| H | 3.34667  | -1.12701 | 2.67279 |
| H | 2.48287  | -3.39906 | 2.30755 |
| H | 0.0699   | -3.76413 | 1.78677 |
| O | -1.75278 | -1.88467 | 1.72496 |
| C | -2.57675 | -1.99407 | 2.90134 |
| C | -2.52552 | -3.40782 | 3.45179 |
| C | -3.96836 | -1.56821 | 2.48502 |
| H | -2.19363 | -1.29026 | 3.65253 |
| H | -1.50454 | -3.68237 | 3.73433 |
| H | -3.1591  | -3.4941  | 4.3414  |
| H | -2.88196 | -4.11954 | 2.69912 |
| H | -3.95866 | -0.53089 | 2.13932 |
| H | -4.3318  | -2.20669 | 1.67195 |
| H | -4.66341 | -1.65156 | 3.32667 |
| O | 1.79831  | 1.11522  | 2.55253 |
| C | 3.18382  | 1.46306  | 2.49597 |
| C | 3.79836  | 1.39357  | 3.88449 |
| C | 3.23312  | 2.85859  | 1.90671 |
| H | 3.69156  | 0.77288  | 1.81073 |
| H | 3.71354  | 0.39102  | 4.3149  |
| H | 4.85935  | 1.66313  | 3.84861 |
| H | 3.28553  | 2.09397  | 4.55252 |
| H | 2.75934  | 2.86523  | 0.92172 |

|    |          |          |          |
|----|----------|----------|----------|
| H  | 2.70015  | 3.56426  | 2.55286  |
| H  | 4.27072  | 3.18997  | 1.79964  |
| P  | -1.30656 | 0.73367  | -0.43581 |
| Pd | 0.49561  | -0.68596 | -0.54039 |
| C  | -1.01307 | 2.25995  | -1.46792 |
| C  | -2.16567 | 3.18047  | -1.87393 |
| C  | 0.125    | 3.05641  | -0.8169  |
| H  | -0.61187 | 1.81649  | -2.3936  |
| C  | -1.66536 | 4.29669  | -2.79237 |
| H  | -2.62184 | 3.6349   | -0.98538 |
| H  | -2.94963 | 2.6119   | -2.38439 |
| C  | 0.6085   | 4.18289  | -1.72593 |
| H  | -0.22902 | 3.47854  | 0.13373  |
| H  | 0.94852  | 2.37494  | -0.56895 |
| C  | -0.54092 | 5.09694  | -2.14114 |
| H  | -2.49834 | 4.95678  | -3.06432 |
| H  | -1.29835 | 3.85229  | -3.72939 |
| H  | 1.3924   | 4.76184  | -1.2199  |
| H  | 1.06746  | 3.74971  | -2.62803 |
| H  | -0.18352 | 5.87881  | -2.82248 |
| H  | -0.93185 | 5.60925  | -1.24981 |
| C  | -2.84907 | -0.12817 | -1.00449 |
| C  | -4.21024 | 0.52975  | -0.7696  |
| C  | -2.67625 | -0.55647 | -2.46733 |
| H  | -2.81017 | -1.03866 | -0.38763 |
| C  | -5.33739 | -0.40526 | -1.20994 |
| H  | -4.2869  | 1.46778  | -1.33361 |
| H  | -4.33122 | 0.78594  | 0.28839  |
| C  | -3.81594 | -1.47319 | -2.9056  |
| H  | -2.65855 | 0.33349  | -3.11478 |
| H  | -1.71116 | -1.06408 | -2.59235 |
| C  | -5.17734 | -0.82522 | -2.66864 |
| H  | -6.30841 | 0.0812   | -1.05308 |
| H  | -5.32761 | -1.30148 | -0.57251 |
| H  | -3.69391 | -1.74114 | -3.96204 |
| H  | -3.75441 | -2.41047 | -2.33431 |
| H  | -5.98325 | -1.51065 | -2.9586  |
| H  | -5.27295 | 0.06234  | -3.31218 |
| C  | 2.14944  | -1.72871 | -1.5061  |
| C  | 3.35055  | -1.7772  | -0.73696 |
| C  | 1.78881  | -0.52711 | -2.21576 |
| C  | 4.12129  | -0.65765 | -0.60579 |
| H  | 3.64245  | -2.71275 | -0.27338 |
| C  | 2.65484  | 0.60208  | -2.08844 |

|   |         |          |          |
|---|---------|----------|----------|
| H | 1.14846 | -0.59576 | -3.09098 |
| C | 3.76681 | 0.54521  | -1.27698 |
| H | 5.03458 | -0.6663  | -0.01948 |
| H | 2.41822 | 1.49221  | -2.66047 |
| S | 1.50407 | -3.25088 | -2.09977 |
| O | 0.76953 | -3.04926 | -3.33009 |
| O | 2.4781  | -4.31085 | -1.9487  |
| F | 0.36439 | -3.61063 | -1.00503 |
| O | 4.62433 | 1.57405  | -1.06108 |
| C | 4.37375 | 2.77955  | -1.74321 |
| H | 3.39567 | 3.19838  | -1.47356 |
| H | 5.15998 | 3.47135  | -1.43682 |
| H | 4.41539 | 2.63906  | -2.83136 |

### Ts1

|   |          |         |          |
|---|----------|---------|----------|
| C | 0.64456  | 2.46889 | 0.29373  |
| C | 0.60955  | 3.83024 | 0.62347  |
| C | 1.55022  | 4.39309 | 1.47564  |
| C | 2.55841  | 3.59591 | 2.00942  |
| C | 2.58618  | 2.23779 | 1.71664  |
| C | 1.62982  | 1.64832 | 0.87658  |
| C | -0.32088 | 2.01722 | -0.74975 |
| C | -1.71468 | 2.0724  | -0.52771 |
| C | -2.60413 | 1.93176 | -1.59791 |
| C | -2.11507 | 1.66845 | -2.873   |
| C | -0.75279 | 1.53218 | -3.10422 |
| C | 0.13966  | 1.72608 | -2.04934 |
| H | -0.16506 | 4.45095 | 0.18145  |
| H | 1.50417  | 5.45295 | 1.71028  |
| H | 3.31431  | 4.02576 | 2.6608   |
| H | 3.36577  | 1.62325 | 2.15101  |
| H | -3.67344 | 2.00286 | -1.4434  |
| H | -2.81618 | 1.54486 | -3.69363 |
| H | -0.3599  | 1.27931 | -4.08265 |
| O | 1.48257  | 1.60845 | -2.26641 |
| C | 2.18493  | 2.83455 | -2.54321 |
| C | 1.92966  | 3.29427 | -3.96776 |
| C | 3.64479  | 2.54188 | -2.27236 |
| H | 1.82993  | 3.59927 | -1.83881 |
| H | 0.86595  | 3.48746 | -4.13755 |
| H | 2.47833  | 4.22069 | -4.17001 |
| H | 2.26316  | 2.52969 | -4.67804 |
| H | 3.78549  | 2.26559 | -1.2244  |

|    |          |          |          |
|----|----------|----------|----------|
| H  | 3.98614  | 1.71316  | -2.90237 |
| H  | 4.25958  | 3.42143  | -2.48874 |
| O  | -2.08564 | 2.26826  | 0.75963  |
| C  | -3.46296 | 2.15193  | 1.12235  |
| C  | -4.16527 | 3.48637  | 0.93371  |
| C  | -3.47469 | 1.6834   | 2.56437  |
| H  | -3.93003 | 1.37962  | 0.49784  |
| H  | -4.09231 | 3.83386  | -0.10138 |
| H  | -5.22595 | 3.40384  | 1.19374  |
| H  | -3.70699 | 4.24251  | 1.58021  |
| H  | -3.00728 | 0.69824  | 2.64903  |
| H  | -2.92054 | 2.38499  | 3.19669  |
| H  | -4.50366 | 1.62046  | 2.93459  |
| P  | 1.50178  | -0.16533 | 0.6575   |
| Pd | -0.36646 | -0.77171 | -0.59612 |
| C  | 1.15955  | -0.78283 | 2.38375  |
| C  | 2.19891  | -0.55916 | 3.48261  |
| C  | -0.20757 | -0.24872 | 2.82799  |
| H  | 1.0561   | -1.86801 | 2.22772  |
| C  | 1.75506  | -1.22721 | 4.78528  |
| H  | 2.31214  | 0.51731  | 3.66295  |
| H  | 3.17917  | -0.94349 | 3.17844  |
| C  | -0.65357 | -0.89077 | 4.13905  |
| H  | -0.15035 | 0.84236  | 2.94706  |
| H  | -0.94871 | -0.43493 | 2.03885  |
| C  | 0.39274  | -0.70699 | 5.23515  |
| H  | 2.50618  | -1.05757 | 5.56677  |
| H  | 1.69882  | -2.31497 | 4.63309  |
| H  | -1.61615 | -0.46813 | 4.45544  |
| H  | -0.81973 | -1.9658  | 3.97345  |
| H  | 0.07596  | -1.21114 | 6.15645  |
| H  | 0.4786   | 0.36336  | 5.47358  |
| C  | 3.11608  | -0.86943 | 0.0854   |
| C  | 4.43842  | -0.22577 | 0.50044  |
| C  | 3.12948  | -2.37324 | 0.39462  |
| H  | 3.0176   | -0.76264 | -1.00394 |
| C  | 5.59336  | -0.90038 | -0.24251 |
| H  | 4.59325  | -0.33371 | 1.58346  |
| H  | 4.43684  | 0.84685  | 0.28143  |
| C  | 4.27721  | -3.05148 | -0.34696 |
| H  | 3.26159  | -2.51894 | 1.4767   |
| H  | 2.17976  | -2.83539 | 0.10993  |
| C  | 5.61766  | -2.40824 | -0.00114 |
| H  | 6.54649  | -0.44775 | 0.05894  |

|   |          |          |          |
|---|----------|----------|----------|
| H | 5.47811  | -0.7065  | -1.31881 |
| H | 4.29307  | -4.12166 | -0.10804 |
| H | 4.08595  | -2.97336 | -1.4257  |
| H | 6.42688  | -2.87042 | -0.57996 |
| H | 5.84367  | -2.59667 | 1.05933  |
| C | -1.95725 | -2.04422 | -1.13051 |
| C | -2.85645 | -1.42839 | -2.00877 |
| C | -2.34159 | -2.36734 | 0.17739  |
| C | -4.12515 | -1.10735 | -1.56674 |
| H | -2.53448 | -1.2082  | -3.02062 |
| C | -3.61709 | -2.03288 | 0.62776  |
| H | -1.65224 | -2.91511 | 0.8126   |
| C | -4.50182 | -1.3887  | -0.24351 |
| H | -4.84636 | -0.6199  | -2.21538 |
| H | -3.90975 | -2.28625 | 1.64039  |
| S | -0.29581 | -2.80292 | -1.80509 |
| O | -0.09902 | -3.97953 | -0.95934 |
| O | -0.65536 | -2.90005 | -3.21877 |
| F | 1.3323   | -2.34491 | -2.05158 |
| O | -5.74611 | -0.98884 | 0.09997  |
| C | -6.18413 | -1.25103 | 1.41458  |
| H | -5.54571 | -0.75392 | 2.15647  |
| H | -7.19598 | -0.84867 | 1.47979  |
| H | -6.20796 | -2.32815 | 1.6219   |

## Int2

|   |          |          |          |
|---|----------|----------|----------|
| C | -2.28827 | -0.64709 | 1.62408  |
| C | -3.21789 | -1.0627  | 2.58266  |
| C | -3.37334 | -0.37374 | 3.7779   |
| C | -2.58752 | 0.74648  | 4.03444  |
| C | -1.64745 | 1.15784  | 3.09727  |
| C | -1.48033 | 0.47461  | 1.8842   |
| C | -2.18121 | -1.39391 | 0.35003  |
| C | -1.63073 | -2.68413 | 0.32128  |
| C | -1.48046 | -3.35824 | -0.89929 |
| C | -1.81896 | -2.72467 | -2.08563 |
| C | -2.33521 | -1.42638 | -2.08706 |
| C | -2.53596 | -0.77715 | -0.86548 |
| H | -3.82161 | -1.94121 | 2.37335  |
| H | -4.1043  | -0.71004 | 4.50783  |
| H | -2.69868 | 1.29539  | 4.96525  |
| H | -1.02841 | 2.02038  | 3.31781  |
| H | -1.06164 | -4.35662 | -0.93622 |

|    |          |          |          |
|----|----------|----------|----------|
| H  | -1.63936 | -3.2206  | -3.03173 |
| H  | -2.58244 | -0.9159  | -3.00958 |
| O  | -3.05295 | 0.49013  | -0.84625 |
| C  | -4.44415 | 0.58668  | -0.48195 |
| C  | -5.31483 | 0.27622  | -1.68489 |
| C  | -4.64118 | 1.98591  | 0.05951  |
| H  | -4.63691 | -0.14253 | 0.31662  |
| H  | -5.11503 | -0.73136 | -2.0633  |
| H  | -6.37496 | 0.33444  | -1.41532 |
| H  | -5.11819 | 0.99285  | -2.48944 |
| H  | -4.01446 | 2.14265  | 0.94227  |
| H  | -4.3707  | 2.72721  | -0.70076 |
| H  | -5.68748 | 2.14467  | 0.33896  |
| O  | -1.22495 | -3.15978 | 1.51974  |
| C  | -0.49534 | -4.38685 | 1.59659  |
| C  | -1.45165 | -5.56757 | 1.60988  |
| C  | 0.3316   | -4.2892  | 2.86361  |
| H  | 0.17965  | -4.44993 | 0.73205  |
| H  | -2.07992 | -5.58783 | 0.71432  |
| H  | -0.8965  | -6.51003 | 1.66081  |
| H  | -2.10731 | -5.5039  | 2.48494  |
| H  | 1.01207  | -3.43359 | 2.8141   |
| H  | -0.32232 | -4.15908 | 3.73216  |
| H  | 0.92282  | -5.19954 | 3.00408  |
| P  | -0.16892 | 0.97746  | 0.70402  |
| Pd | 0.10228  | -0.24944 | -1.2997  |
| C  | 1.37584  | 1.13421  | 1.72716  |
| C  | 1.66683  | 2.42931  | 2.48905  |
| C  | 1.49406  | -0.0814  | 2.65666  |
| H  | 2.15858  | 1.03354  | 0.96394  |
| C  | 3.06625  | 2.35705  | 3.10385  |
| H  | 0.93361  | 2.58635  | 3.29128  |
| H  | 1.60471  | 3.29546  | 1.82262  |
| C  | 2.88287  | -0.14624 | 3.2857   |
| H  | 0.73396  | -0.01196 | 3.44571  |
| H  | 1.28282  | -1.00296 | 2.10179  |
| C  | 3.21469  | 1.14798  | 4.02361  |
| H  | 3.28004  | 3.28462  | 3.64925  |
| H  | 3.8047   | 2.28771  | 2.29192  |
| H  | 2.93973  | -1.00194 | 3.97038  |
| H  | 3.62448  | -0.32235 | 2.49494  |
| H  | 4.23155  | 1.10494  | 4.4322   |
| H  | 2.53486  | 1.26245  | 4.88102  |
| C  | -0.70142 | 2.62286  | 0.02119  |

|   |          |          |          |
|---|----------|----------|----------|
| C | -1.2173  | 3.67371  | 1.0076   |
| C | 0.38431  | 3.18672  | -0.9059  |
| H | -1.55006 | 2.32324  | -0.61152 |
| C | -1.70385 | 4.91414  | 0.25779  |
| H | -0.42434 | 3.96596  | 1.70685  |
| H | -2.0348  | 3.25931  | 1.60629  |
| C | -0.10733 | 4.44238  | -1.62219 |
| H | 1.29013  | 3.42276  | -0.32978 |
| H | 0.66665  | 2.42698  | -1.64429 |
| C | -0.61134 | 5.49188  | -0.63681 |
| H | -2.0547  | 5.66567  | 0.97585  |
| H | -2.57063 | 4.64034  | -0.36131 |
| H | 0.69755  | 4.84941  | -2.2456  |
| H | -0.92203 | 4.1626   | -2.30513 |
| H | -0.98461 | 6.37227  | -1.17378 |
| H | 0.22537  | 5.83631  | -0.01071 |
| C | 2.04314  | -0.40241 | -0.98047 |
| C | 2.46793  | -1.51734 | -0.25252 |
| C | 2.9793   | 0.52311  | -1.42071 |
| C | 3.81093  | -1.67961 | 0.06262  |
| H | 1.74904  | -2.26168 | 0.07933  |
| C | 4.32986  | 0.37582  | -1.09204 |
| H | 2.67657  | 1.35733  | -2.04356 |
| C | 4.74851  | -0.72387 | -0.34221 |
| H | 4.15665  | -2.54058 | 0.62731  |
| H | 5.03959  | 1.1154   | -1.44667 |
| S | 0.55148  | -0.63891 | -3.57439 |
| O | 1.66941  | 0.11637  | -4.13642 |
| O | 0.2576   | -1.95083 | -4.15657 |
| F | -0.7813  | 0.2928   | -4.0306  |
| O | 6.03147  | -0.95546 | 0.04082  |
| C | 7.00571  | -0.02662 | -0.36568 |
| H | 6.80244  | 0.97538  | 0.03711  |
| H | 7.95486  | -0.38793 | 0.03408  |
| H | 7.07445  | 0.03564  | -1.4599  |

## Ts2

|   |          |          |          |
|---|----------|----------|----------|
| C | -0.98909 | -2.57617 | -0.48002 |
| C | -1.41257 | -3.89914 | -0.67345 |
| C | -1.6708  | -4.42178 | -1.93113 |
| C | -1.54594 | -3.59679 | -3.04147 |
| C | -1.12603 | -2.2848  | -2.87246 |
| C | -0.80396 | -1.75375 | -1.61213 |

|    |          |          |          |
|----|----------|----------|----------|
| C  | -0.89977 | -2.16473 | 0.95053  |
| C  | -2.10807 | -1.99484 | 1.66419  |
| C  | -2.09572 | -1.73291 | 3.03521  |
| C  | -0.87922 | -1.65628 | 3.70798  |
| C  | 0.31707  | -1.86402 | 3.03941  |
| C  | 0.29732  | -2.14886 | 1.67145  |
| H  | -1.55421 | -4.51929 | 0.20759  |
| H  | -1.98886 | -5.45489 | -2.03816 |
| H  | -1.775   | -3.9646  | -4.03741 |
| H  | -1.06379 | -1.65588 | -3.74804 |
| H  | -3.02071 | -1.58589 | 3.57987  |
| H  | -0.87144 | -1.44432 | 4.77327  |
| H  | 1.27037  | -1.83807 | 3.55572  |
| O  | 1.48817  | -2.4464  | 1.06151  |
| C  | 1.7684   | -3.85917 | 0.81534  |
| C  | 1.33421  | -4.73153 | 1.97933  |
| C  | 3.25713  | -3.9597  | 0.55873  |
| H  | 1.21026  | -4.13698 | -0.08619 |
| H  | 0.25838  | -4.67151 | 2.17205  |
| H  | 1.5795   | -5.77322 | 1.74783  |
| H  | 1.86575  | -4.45071 | 2.8952   |
| H  | 3.54254  | -3.38307 | -0.32189 |
| H  | 3.82086  | -3.58161 | 1.41761  |
| H  | 3.52369  | -5.00893 | 0.39278  |
| O  | -3.23567 | -2.11937 | 0.9255   |
| C  | -4.5076  | -2.25034 | 1.56108  |
| C  | -4.62899 | -3.6056  | 2.23998  |
| C  | -5.52991 | -2.07429 | 0.45551  |
| H  | -4.62836 | -1.43945 | 2.29287  |
| H  | -3.8511  | -3.75425 | 2.99437  |
| H  | -5.60371 | -3.70032 | 2.72969  |
| H  | -4.53872 | -4.40053 | 1.49169  |
| H  | -5.43581 | -1.08911 | -0.00899 |
| H  | -5.38009 | -2.83631 | -0.3166  |
| H  | -6.54319 | -2.17662 | 0.85619  |
| P  | -0.29679 | 0.01797  | -1.57259 |
| Pd | 1.10532  | 0.6929   | 0.15014  |
| C  | -1.89359 | 0.93715  | -1.80695 |
| C  | -2.52094 | 0.84058  | -3.20081 |
| C  | -2.92273 | 0.52748  | -0.75346 |
| H  | -1.6175  | 1.9827   | -1.62279 |
| C  | -3.76165 | 1.73297  | -3.28575 |
| H  | -2.80824 | -0.19992 | -3.40315 |
| H  | -1.81137 | 1.1396   | -3.97741 |



|   |          |          |          |
|---|----------|----------|----------|
| C | -4.1461  | 1.43683  | -0.82311 |
| H | -3.21882 | -0.51304 | -0.93064 |
| H | -2.48797 | 0.56838  | 0.24638  |
| C | -4.78506 | 1.39183  | -2.20685 |
| H | -4.20883 | 1.64533  | -4.28367 |
| H | -3.45139 | 2.78199  | -3.17092 |
| H | -4.87023 | 1.14505  | -0.05204 |
| H | -3.83928 | 2.46465  | -0.58375 |
| H | -5.64006 | 2.07669  | -2.2648  |
| H | -5.17741 | 0.38019  | -2.38981 |
| C | 0.79318  | 0.45737  | -3.04419 |
| C | 0.63499  | -0.1462  | -4.44516 |
| C | 0.86517  | 1.99383  | -3.08197 |
| H | 1.77325  | 0.10651  | -2.72032 |
| C | 1.74239  | 0.37602  | -5.36521 |
| H | -0.34216 | 0.08547  | -4.88672 |
| H | 0.73081  | -1.2335  | -4.38875 |
| C | 1.96219  | 2.47569  | -4.02713 |
| H | -0.09983 | 2.41258  | -3.39911 |
| H | 1.06821  | 2.37294  | -2.07198 |
| C | 1.77773  | 1.89821  | -5.42467 |
| H | 1.60513  | -0.04939 | -6.36686 |
| H | 2.70861  | 0.00684  | -4.99432 |
| H | 1.96413  | 3.57232  | -4.05539 |
| H | 2.93352  | 2.16214  | -3.62386 |
| H | 2.58454  | 2.23352  | -6.08725 |
| H | 0.8372   | 2.2725   | -5.85659 |
| C | -0.36068 | 1.84858  | 0.84989  |
| C | -1.04905 | 1.43892  | 1.99367  |
| C | -0.62518 | 3.11103  | 0.33056  |
| C | -1.97971 | 2.2706   | 2.60096  |
| H | -0.85818 | 0.4625   | 2.42122  |
| C | -1.55878 | 3.96122  | 0.93293  |
| H | -0.09707 | 3.46933  | -0.54959 |
| C | -2.24353 | 3.53772  | 2.07235  |
| H | -2.51723 | 1.95429  | 3.49049  |
| H | -1.73313 | 4.94305  | 0.50542  |
| S | 3.04794  | -0.48677 | -0.69396 |
| O | 4.13905  | -0.66748 | 0.33639  |
| O | 2.99068  | -1.58868 | -1.65103 |
| F | 3.71993  | 0.73787  | -1.60275 |
| O | -3.17496 | 4.27519  | 2.73267  |
| C | -3.47848 | 5.54694  | 2.21728  |
| H | -3.87576 | 5.48522  | 1.19455  |

|   |          |          |         |
|---|----------|----------|---------|
| H | -4.24216 | 5.96729  | 2.87404 |
| H | -2.59973 | 6.20636  | 2.21843 |
| B | 3.9487   | -0.09934 | 1.88238 |
| O | 3.52187  | -1.22461 | 2.63693 |
| H | 2.81399  | -1.67028 | 2.14867 |
| O | 5.25866  | 0.36449  | 2.16892 |
| H | 5.22773  | 0.95116  | 2.93144 |
| C | 2.88171  | 1.17069  | 1.89459 |
| C | 2.11294  | 1.33941  | 3.0706  |
| C | 3.00225  | 2.31501  | 1.05985 |
| C | 1.55788  | 2.56163  | 3.42407 |
| H | 2.01029  | 0.48281  | 3.73077 |
| C | 2.43609  | 3.54605  | 1.4099  |
| H | 3.62682  | 2.25724  | 0.17204 |
| C | 1.7277   | 3.67358  | 2.597   |
| H | 0.98692  | 2.65583  | 4.34396 |
| H | 2.56325  | 4.40365  | 0.75384 |
| H | 1.28934  | 4.62883  | 2.87201 |

### Int3

|   |          |          |          |
|---|----------|----------|----------|
| C | -0.86212 | -2.42769 | 0.54293  |
| C | -0.95402 | -3.74102 | 1.02168  |
| C | -2.12657 | -4.21978 | 1.59064  |
| C | -3.23839 | -3.3869  | 1.68655  |
| C | -3.1557  | -2.07714 | 1.23002  |
| C | -1.97393 | -1.57744 | 0.6649   |
| C | 0.41227  | -2.05555 | -0.1453  |
| C | 1.6406   | -2.10215 | 0.56653  |
| C | 2.85355  | -2.18783 | -0.12148 |
| C | 2.86061  | -2.16316 | -1.51    |
| C | 1.68104  | -2.06217 | -2.23802 |
| C | 0.46467  | -2.02895 | -1.56059 |
| H | -0.08633 | -4.38959 | 0.9357   |
| H | -2.1743  | -5.24294 | 1.95316  |
| H | -4.16394 | -3.75286 | 2.12214  |
| H | -4.02289 | -1.43237 | 1.31415  |
| H | 3.79518  | -2.21464 | 0.41179  |
| H | 3.81307  | -2.18547 | -2.02967 |
| H | 1.68499  | -1.99646 | -3.32009 |
| O | -0.71581 | -1.99787 | -2.25186 |
| C | -1.2472  | -3.29232 | -2.60517 |
| C | -0.67317 | -3.75908 | -3.93108 |
| C | -2.75341 | -3.14435 | -2.63492 |

|    |          |          |          |
|----|----------|----------|----------|
| H  | -0.97083 | -4.00069 | -1.81272 |
| H  | 0.41251  | -3.87863 | -3.8723  |
| H  | -1.1051  | -4.72602 | -4.21161 |
| H  | -0.90406 | -3.03337 | -4.71858 |
| H  | -3.12626 | -2.88443 | -1.64124 |
| H  | -3.0421  | -2.355   | -3.33819 |
| H  | -3.22443 | -4.08008 | -2.95319 |
| O  | 1.51393  | -2.08651 | 1.90857  |
| C  | 2.67658  | -1.95455 | 2.73458  |
| C  | 3.27853  | -3.32365 | 3.00256  |
| C  | 2.20143  | -1.26563 | 3.9985   |
| H  | 3.39607  | -1.30451 | 2.22254  |
| H  | 3.56297  | -3.82486 | 2.07222  |
| H  | 4.17133  | -3.23333 | 3.63001  |
| H  | 2.5507   | -3.95553 | 3.52324  |
| H  | 1.78078  | -0.2835  | 3.76248  |
| H  | 1.42656  | -1.86374 | 4.48983  |
| H  | 3.03492  | -1.13231 | 4.69544  |
| P  | -1.75033 | 0.16678  | 0.16426  |
| Pd | 0.54673  | 0.50448  | -0.30893 |
| C  | -2.1442  | 1.16488  | 1.67685  |
| C  | -3.56885 | 1.21386  | 2.23018  |
| C  | -1.15514 | 0.75736  | 2.77739  |
| H  | -1.8705  | 2.18105  | 1.35238  |
| C  | -3.64555 | 2.18062  | 3.41349  |
| H  | -3.86962 | 0.21605  | 2.57464  |
| H  | -4.28012 | 1.51897  | 1.45513  |
| C  | -1.23905 | 1.70321  | 3.97213  |
| H  | -1.3758  | -0.27005 | 3.10001  |
| H  | -0.1364  | 0.73794  | 2.36662  |
| C  | -2.66338 | 1.78991  | 4.51446  |
| H  | -4.66978 | 2.20902  | 3.80609  |
| H  | -3.41339 | 3.19646  | 3.06189  |
| H  | -0.54796 | 1.3746   | 4.75875  |
| H  | -0.91016 | 2.70497  | 3.65967  |
| H  | -2.71513 | 2.50635  | 5.34357  |
| H  | -2.95393 | 0.81123  | 4.92451  |
| C  | -2.98177 | 0.5557   | -1.16804 |
| C  | -4.38329 | -0.05428 | -1.10085 |
| C  | -3.06025 | 2.07704  | -1.35359 |
| H  | -2.48002 | 0.1352   | -2.0529  |
| C  | -5.17351 | 0.29792  | -2.36191 |
| H  | -4.92086 | 0.32685  | -0.22205 |
| H  | -4.32667 | -1.14176 | -0.99284 |

|   |          |          |          |
|---|----------|----------|----------|
| C | -3.85163 | 2.42643  | -2.61096 |
| H | -3.55816 | 2.52588  | -0.48205 |
| H | -2.05759 | 2.51316  | -1.4038  |
| C | -5.2461  | 1.80742  | -2.58047 |
| H | -6.18167 | -0.13118 | -2.30206 |
| H | -4.68405 | -0.17046 | -3.22881 |
| H | -3.91574 | 3.51612  | -2.71786 |
| H | -3.30556 | 2.05552  | -3.49074 |
| H | -5.78832 | 2.03181  | -3.50736 |
| H | -5.82294 | 2.2615   | -1.76094 |
| C | 2.51913  | 0.92632  | -0.44709 |
| C | 3.27387  | 1.06912  | 0.72645  |
| C | 3.21895  | 0.93386  | -1.65256 |
| C | 4.66204  | 1.12906  | 0.70419  |
| H | 2.76822  | 1.12559  | 1.68985  |
| C | 4.61533  | 1.00659  | -1.70271 |
| H | 2.67584  | 0.86745  | -2.59327 |
| C | 5.34292  | 1.08832  | -0.51639 |
| H | 5.24325  | 1.22601  | 1.61779  |
| H | 5.11565  | 1.00566  | -2.66638 |
| O | 6.70406  | 1.14849  | -0.44201 |
| C | 7.41269  | 1.15465  | -1.65302 |
| H | 7.14687  | 2.01978  | -2.27628 |
| H | 8.47047  | 1.21528  | -1.3886  |
| H | 7.23862  | 0.23635  | -2.23219 |
| C | 0.46704  | 2.4922   | -0.43046 |
| C | 0.42103  | 3.30727  | 0.70502  |
| C | 0.35516  | 3.10392  | -1.68549 |
| C | 0.21958  | 4.6835   | 0.59433  |
| H | 0.55178  | 2.87062  | 1.69228  |
| C | 0.15495  | 4.47913  | -1.79757 |
| H | 0.41909  | 2.50058  | -2.58799 |
| C | 0.07674  | 5.27562  | -0.65714 |
| H | 0.18168  | 5.29442  | 1.49397  |
| H | 0.06244  | 4.92955  | -2.78366 |
| H | -0.07912 | 6.3476   | -0.74447 |

### Ts3

|   |          |          |         |
|---|----------|----------|---------|
| C | -0.84139 | -2.31731 | 0.98688 |
| C | -0.92827 | -3.50632 | 1.7213  |
| C | -2.05703 | -3.81153 | 2.47088 |
| C | -3.12865 | -2.92336 | 2.49726 |
| C | -3.05051 | -1.73396 | 1.78236 |

|    |          |          |          |
|----|----------|----------|----------|
| C  | -1.91551 | -1.4082  | 1.02726  |
| C  | 0.3846   | -2.12647 | 0.15467  |
| C  | 1.65069  | -1.98038 | 0.76959  |
| C  | 2.82059  | -2.07696 | 0.00913  |
| C  | 2.73512  | -2.27609 | -1.3632  |
| C  | 1.50471  | -2.39391 | -1.99937 |
| C  | 0.33967  | -2.33678 | -1.23803 |
| H  | -0.08943 | -4.19686 | 1.69552  |
| H  | -2.10037 | -4.74141 | 3.03134  |
| H  | -4.01945 | -3.15226 | 3.07587  |
| H  | -3.88674 | -1.0443  | 1.81086  |
| H  | 3.79389  | -1.95053 | 0.46643  |
| H  | 3.65052  | -2.31499 | -1.94516 |
| H  | 1.42748  | -2.52222 | -3.07355 |
| O  | -0.8836  | -2.48212 | -1.83624 |
| C  | -1.38757 | -3.83236 | -1.85869 |
| C  | -0.89255 | -4.55202 | -3.10058 |
| C  | -2.89681 | -3.73704 | -1.78864 |
| H  | -1.01883 | -4.34816 | -0.96212 |
| H  | 0.20031  | -4.60527 | -3.11181 |
| H  | -1.28329 | -5.57513 | -3.13228 |
| H  | -1.22576 | -4.02379 | -4.00067 |
| H  | -3.20349 | -3.27861 | -0.84479 |
| H  | -3.27698 | -3.12799 | -2.61653 |
| H  | -3.34753 | -4.73251 | -1.85772 |
| O  | 1.60946  | -1.76555 | 2.10221  |
| C  | 2.81163  | -1.47394 | 2.81871  |
| C  | 3.50012  | -2.76691 | 3.2225   |
| C  | 2.38079  | -0.6393  | 4.00835  |
| H  | 3.46585  | -0.87049 | 2.17832  |
| H  | 3.74814  | -3.37495 | 2.34699  |
| H  | 4.42643  | -2.55574 | 3.76746  |
| H  | 2.84117  | -3.35367 | 3.87177  |
| H  | 1.88564  | 0.27563  | 3.6689   |
| H  | 1.67606  | -1.20017 | 4.63137  |
| H  | 3.24758  | -0.36593 | 4.6189   |
| P  | -1.71489 | 0.18595  | 0.14968  |
| Pd | 0.53406  | 0.53165  | -0.38191 |
| C  | -2.15992 | 1.5216   | 1.36594  |
| C  | -3.60996 | 1.78693  | 1.77294  |
| C  | -1.27096 | 1.35536  | 2.60512  |
| H  | -1.79602 | 2.41531  | 0.83285  |
| C  | -3.69149 | 3.02019  | 2.67445  |
| H  | -4.0172  | 0.92422  | 2.31635  |

|   |          |          |          |
|---|----------|----------|----------|
| H | -4.24048 | 1.93976  | 0.89108  |
| C | -1.35933 | 2.58082  | 3.50995  |
| H | -1.58424 | 0.45963  | 3.16018  |
| H | -0.23468 | 1.17691  | 2.28675  |
| C | -2.80393 | 2.87374  | 3.90733  |
| H | -4.7331  | 3.19831  | 2.97024  |
| H | -3.37114 | 3.90164  | 2.0998   |
| H | -0.73838 | 2.43453  | 4.403    |
| H | -0.94825 | 3.4487   | 2.97426  |
| H | -2.85615 | 3.77935  | 4.52442  |
| H | -3.18197 | 2.04727  | 4.52749  |
| C | -2.94508 | 0.18901  | -1.23914 |
| C | -4.36202 | -0.32206 | -0.97444 |
| C | -2.96345 | 1.57701  | -1.89234 |
| H | -2.47175 | -0.50729 | -1.94724 |
| C | -5.17176 | -0.33825 | -2.27089 |
| H | -4.87106 | 0.31866  | -0.24312 |
| H | -4.32948 | -1.32894 | -0.54565 |
| C | -3.78536 | 1.55741  | -3.17925 |
| H | -3.40167 | 2.30851  | -1.19796 |
| H | -1.93929 | 1.91415  | -2.09122 |
| C | -5.19961 | 1.03796  | -2.93109 |
| H | -6.19187 | -0.69008 | -2.07157 |
| H | -4.71959 | -1.06219 | -2.96502 |
| H | -3.81656 | 2.5625   | -3.61786 |
| H | -3.28447 | 0.90817  | -3.91237 |
| H | -5.76421 | 0.99938  | -3.87103 |
| H | -5.73166 | 1.7416   | -2.27343 |
| C | 2.44672  | 1.23159  | -0.6311  |
| C | 3.23305  | 1.36072  | 0.52644  |
| C | 3.10925  | 0.93428  | -1.82544 |
| C | 4.60175  | 1.14205  | 0.50266  |
| H | 2.76361  | 1.63345  | 1.4691   |
| C | 4.4874   | 0.71887  | -1.87103 |
| H | 2.54374  | 0.85847  | -2.75109 |
| C | 5.23902  | 0.80941  | -0.69875 |
| H | 5.20692  | 1.23314  | 1.40089  |
| H | 4.9579   | 0.4842   | -2.82058 |
| O | 6.58257  | 0.60969  | -0.62161 |
| C | 7.25601  | 0.28214  | -1.81013 |
| H | 7.16604  | 1.07902  | -2.56089 |
| H | 8.30687  | 0.15952  | -1.54121 |
| H | 6.88242  | -0.65675 | -2.24263 |
| C | 0.87352  | 2.50587  | -0.7274  |

|   |          |         |          |
|---|----------|---------|----------|
| C | 0.77486  | 3.40611 | 0.3474   |
| C | 0.60929  | 3.00076 | -2.01651 |
| C | 0.38993  | 4.72874 | 0.14652  |
| H | 1.00044  | 3.0682  | 1.35573  |
| C | 0.2231   | 4.32311 | -2.21412 |
| H | 0.70182  | 2.33954 | -2.87458 |
| C | 0.10517  | 5.19735 | -1.13465 |
| H | 0.31396  | 5.39815 | 1.00102  |
| H | 0.01367  | 4.67291 | -3.22273 |
| H | -0.19155 | 6.23066 | -1.29121 |

#### Ts4

|   |          |          |          |
|---|----------|----------|----------|
| C | -2.88789 | -1.09065 | 1.07532  |
| C | -3.85549 | -1.66612 | 1.90151  |
| C | -4.53088 | -0.91262 | 2.85546  |
| C | -4.24205 | 0.44138  | 2.98694  |
| C | -3.26296 | 1.01924  | 2.1851   |
| C | -2.55784 | 0.2714   | 1.23453  |
| C | -2.26332 | -1.92638 | 0.01404  |
| C | -1.15747 | -2.75935 | 0.29862  |
| C | -0.55646 | -3.49822 | -0.73332 |
| C | -1.05926 | -3.41016 | -2.03068 |
| C | -2.16379 | -2.61977 | -2.31954 |
| C | -2.76233 | -1.88844 | -1.29393 |
| H | -4.07578 | -2.72418 | 1.78632  |
| H | -5.28052 | -1.38049 | 3.4876   |
| H | -4.77068 | 1.04863  | 3.71674  |
| H | -3.04303 | 2.07383  | 2.30466  |
| H | 0.28766  | -4.14605 | -0.52751 |
| H | -0.58042 | -3.98059 | -2.82143 |
| H | -2.55867 | -2.53647 | -3.32638 |
| O | -3.80221 | -1.04596 | -1.58286 |
| C | -5.11827 | -1.55346 | -1.30204 |
| C | -5.64064 | -2.31549 | -2.50733 |
| C | -5.97277 | -0.36142 | -0.92675 |
| H | -5.04751 | -2.23189 | -0.4422  |
| H | -4.97921 | -3.1528  | -2.75262 |
| H | -6.64013 | -2.71742 | -2.30743 |
| H | -5.69963 | -1.6525  | -3.37755 |
| H | -5.5841  | 0.11126  | -0.01994 |
| H | -5.96904 | 0.37607  | -1.73691 |
| H | -7.00716 | -0.67193 | -0.74554 |
| O | -0.788   | -2.81713 | 1.59731  |

|    |          |          |          |
|----|----------|----------|----------|
| C  | 0.53171  | -3.2613  | 1.93437  |
| C  | 0.49882  | -4.74168 | 2.27427  |
| C  | 0.98857  | -2.39479 | 3.09043  |
| H  | 1.19245  | -3.07599 | 1.07635  |
| H  | 0.11957  | -5.33756 | 1.43812  |
| H  | 1.50239  | -5.10063 | 2.52686  |
| H  | -0.15623 | -4.91093 | 3.13569  |
| H  | 1.04402  | -1.35027 | 2.77265  |
| H  | 0.28705  | -2.47695 | 3.9274   |
| H  | 1.98039  | -2.70969 | 3.43227  |
| P  | -1.17551 | 0.97764  | 0.24442  |
| Pd | 0.29911  | -0.61431 | -0.34437 |
| C  | -0.39636 | 2.34164  | 1.2463   |
| C  | -1.04227 | 3.72569  | 1.36591  |
| C  | 0.0088   | 1.79908  | 2.62207  |
| H  | 0.53627  | 2.47593  | 0.67726  |
| C  | -0.08934 | 4.68843  | 2.07803  |
| H  | -1.98278 | 3.67591  | 1.93044  |
| H  | -1.2907  | 4.12364  | 0.37729  |
| C  | 0.9475   | 2.7691   | 3.33318  |
| H  | -0.88772 | 1.6374   | 3.23538  |
| H  | 0.49571  | 0.82683  | 2.49829  |
| C  | 0.32815  | 4.15945  | 3.44725  |
| H  | -0.55925 | 5.67564  | 2.17295  |
| H  | 0.80665  | 4.82403  | 1.45474  |
| H  | 1.20101  | 2.38097  | 4.32779  |
| H  | 1.88822  | 2.82607  | 2.7677   |
| H  | 1.02834  | 4.85555  | 3.92592  |
| H  | -0.5579  | 4.10758  | 4.09786  |
| C  | -2.01596 | 1.71086  | -1.24046 |
| C  | -3.30433 | 2.49928  | -1.00479 |
| C  | -1.01366 | 2.48807  | -2.09975 |
| H  | -2.2973  | 0.80994  | -1.80289 |
| C  | -3.92861 | 2.88862  | -2.34449 |
| H  | -3.10237 | 3.40685  | -0.42187 |
| H  | -4.00922 | 1.89671  | -0.42305 |
| C  | -1.65238 | 2.89491  | -3.42631 |
| H  | -0.68229 | 3.3911   | -1.56779 |
| H  | -0.11764 | 1.87909  | -2.26651 |
| C  | -2.94665 | 3.67597  | -3.20949 |
| H  | -4.84564 | 3.46873  | -2.17916 |
| H  | -4.22334 | 1.97089  | -2.87437 |
| H  | -0.9426  | 3.48597  | -4.0186  |
| H  | -1.87073 | 1.98768  | -4.00868 |



|   |          |          |          |
|---|----------|----------|----------|
| H | -3.40544 | 3.93096  | -4.17316 |
| H | -2.71291 | 4.62865  | -2.71074 |
| C | 4.4497   | 0.20272  | -0.57551 |
| C | 4.98846  | 0.5394   | -1.8181  |
| C | 5.26529  | -0.26214 | 0.44754  |
| C | 6.34898  | 0.40995  | -2.0283  |
| H | 4.34     | 0.91533  | -2.60216 |
| C | 6.63474  | -0.39351 | 0.24018  |
| H | 4.83086  | -0.50388 | 1.41175  |
| C | 7.18062  | -0.0586  | -1.00241 |
| H | 6.79971  | 0.67099  | -2.9803  |
| H | 7.26164  | -0.74908 | 1.04978  |
| S | 2.69617  | 0.36002  | -0.30027 |
| O | 2.5789   | 0.44731  | 1.15727  |
| O | 2.28102  | 1.36748  | -1.27726 |
| F | 2.47746  | -1.26074 | -0.85867 |
| O | 8.49311  | -0.14525 | -1.30809 |
| C | 9.3745   | -0.60423 | -0.3087  |
| H | 9.12795  | -1.62639 | 0.00636  |
| H | 10.36853 | -0.59585 | -0.75791 |
| H | 9.36733  | 0.05645  | 0.56786  |

#### Int4

|   |          |          |          |
|---|----------|----------|----------|
| C | -2.26893 | -1.71894 | 0.47082  |
| C | -3.17273 | -2.69162 | 0.90902  |
| C | -4.42497 | -2.33761 | 1.39676  |
| C | -4.79625 | -0.99655 | 1.44432  |
| C | -3.89967 | -0.0192  | 1.02766  |
| C | -2.63    | -0.36499 | 0.55054  |
| C | -0.99551 | -2.18546 | -0.15533 |
| C | -0.04511 | -2.93426 | 0.59148  |
| C | 0.94615  | -3.66237 | -0.07625 |
| C | 1.031    | -3.62054 | -1.45595 |
| C | 0.12242  | -2.8876  | -2.21874 |
| C | -0.90742 | -2.21738 | -1.57677 |
| H | -2.88016 | -3.73694 | 0.86122  |
| H | -5.11131 | -3.10836 | 1.7359   |
| H | -5.77582 | -0.71031 | 1.81634  |
| H | -4.18779 | 1.02471  | 1.08212  |
| H | 1.68137  | -4.21677 | 0.49284  |
| H | 1.8328   | -4.15897 | -1.95241 |
| H | 0.19456  | -2.84084 | -3.29942 |
| O | -1.87999 | -1.58396 | -2.29718 |

|    |          |          |          |
|----|----------|----------|----------|
| C  | -3.00431 | -2.42394 | -2.64921 |
| C  | -2.76238 | -3.07004 | -4.00083 |
| C  | -4.23927 | -1.54918 | -2.62321 |
| H  | -3.09764 | -3.20057 | -1.8787  |
| H  | -1.87831 | -3.71382 | -3.97739 |
| H  | -3.62194 | -3.68536 | -4.28815 |
| H  | -2.61437 | -2.29995 | -4.76557 |
| H  | -4.40934 | -1.15595 | -1.61747 |
| H  | -4.12491 | -0.70996 | -3.31776 |
| H  | -5.11858 | -2.12733 | -2.92557 |
| O  | -0.16102 | -2.88717 | 1.92769  |
| C  | 1.06052  | -2.93885 | 2.71214  |
| C  | 1.18646  | -4.31905 | 3.32754  |
| C  | 0.95485  | -1.83243 | 3.74153  |
| H  | 1.88758  | -2.70106 | 2.0357   |
| H  | 1.21625  | -5.1021  | 2.56259  |
| H  | 2.10313  | -4.38724 | 3.92296  |
| H  | 0.33309  | -4.51983 | 3.98489  |
| H  | 1.00168  | -0.85278 | 3.25729  |
| H  | 0.02094  | -1.91874 | 4.3078   |
| H  | 1.79392  | -1.8955  | 4.44317  |
| P  | -1.372   | 0.88546  | 0.11529  |
| Pd | 0.5776   | -0.29141 | 0.13854  |
| C  | -1.40436 | 2.18109  | 1.43069  |
| C  | -2.49132 | 3.25922  | 1.43368  |
| C  | -1.29417 | 1.49313  | 2.79804  |
| H  | -0.45365 | 2.6968   | 1.23624  |
| C  | -2.18898 | 4.28134  | 2.53221  |
| H  | -3.48296 | 2.82384  | 1.61464  |
| H  | -2.5337  | 3.77049  | 0.46671  |
| C  | -1.00371 | 2.51987  | 3.88748  |
| H  | -2.23129 | 0.96459  | 3.02175  |
| H  | -0.49865 | 0.74072  | 2.77499  |
| C  | -2.06039 | 3.62124  | 3.90226  |
| H  | -2.97245 | 5.04941  | 2.54657  |
| H  | -1.24729 | 4.79197  | 2.28642  |
| H  | -0.95688 | 2.02022  | 4.86275  |
| H  | -0.01069 | 2.95166  | 3.70509  |
| H  | -1.81921 | 4.3747   | 4.66204  |
| H  | -3.03143 | 3.18764  | 4.18585  |
| C  | -1.82624 | 1.56707  | -1.53958 |
| C  | -3.29112 | 1.97082  | -1.72956 |
| C  | -0.86646 | 2.68848  | -1.95042 |
| H  | -1.64166 | 0.70292  | -2.19368 |

|   |          |          |          |
|---|----------|----------|----------|
| C | -3.53338 | 2.38661  | -3.18059 |
| H | -3.5471  | 2.81009  | -1.0719  |
| H | -3.95172 | 1.14021  | -1.4606  |
| C | -1.13242 | 3.11055  | -3.39367 |
| H | -0.99167 | 3.55406  | -1.28595 |
| H | 0.17014  | 2.36198  | -1.82405 |
| C | -2.59054 | 3.51041  | -3.60285 |
| H | -4.57963 | 2.68977  | -3.31149 |
| H | -3.37163 | 1.51661  | -3.83418 |
| H | -0.46496 | 3.93688  | -3.6665  |
| H | -0.88719 | 2.27235  | -4.06239 |
| H | -2.76698 | 3.78132  | -4.65104 |
| H | -2.80906 | 4.40759  | -3.00488 |
| C | 3.45315  | 1.1757   | -0.03753 |
| C | 3.69835  | 1.80977  | -1.25404 |
| C | 4.39192  | 0.3283   | 0.53527  |
| C | 4.90674  | 1.60175  | -1.89546 |
| H | 2.95199  | 2.47669  | -1.67297 |
| C | 5.6107   | 0.12672  | -0.1017  |
| H | 4.16235  | -0.16447 | 1.47109  |
| C | 5.86739  | 0.75886  | -1.3226  |
| H | 5.13976  | 2.08798  | -2.83737 |
| H | 6.3442   | -0.52886 | 0.35372  |
| S | 1.89889  | 1.44555  | 0.7806   |
| O | 2.11448  | 1.28337  | 2.23559  |
| O | 1.43293  | 2.77038  | 0.29864  |
| F | 2.25593  | -1.35793 | 0.33057  |
| O | 7.0172   | 0.62343  | -2.02394 |
| C | 8.01644  | -0.21257 | -1.49082 |
| H | 7.66471  | -1.24766 | -1.38989 |
| H | 8.84538  | -0.18134 | -2.19988 |
| H | 8.36333  | 0.14629  | -0.51287 |

### Ts5

|   |          |          |         |
|---|----------|----------|---------|
| C | -1.28364 | -1.36777 | 1.75412 |
| C | -1.52619 | -2.03608 | 2.95664 |
| C | -2.37377 | -1.50879 | 3.92338 |
| C | -3.00133 | -0.2892  | 3.69454 |
| C | -2.73888 | 0.40663  | 2.51998 |
| C | -1.87453 | -0.10324 | 1.54355 |
| C | -0.48969 | -2.05114 | 0.70431 |
| C | 0.90005  | -2.25996 | 0.82492 |
| C | 1.60434  | -2.80299 | -0.2579 |

|    |          |          |          |
|----|----------|----------|----------|
| C  | 0.93049  | -3.18008 | -1.41401 |
| C  | -0.45286 | -3.08081 | -1.50458 |
| C  | -1.15121 | -2.53999 | -0.42951 |
| H  | -1.03973 | -2.99339 | 3.11959  |
| H  | -2.54843 | -2.05248 | 4.84763  |
| H  | -3.67887 | 0.13142  | 4.43212  |
| H  | -3.21107 | 1.36937  | 2.36663  |
| H  | 2.67959  | -2.91831 | -0.20675 |
| H  | 1.49641  | -3.58538 | -2.24824 |
| H  | -0.99607 | -3.41124 | -2.38329 |
| O  | -2.52194 | -2.45918 | -0.47516 |
| C  | -3.20531 | -3.51693 | 0.22456  |
| C  | -3.34547 | -4.7272  | -0.68091 |
| C  | -4.53541 | -2.95723 | 0.68237  |
| H  | -2.60546 | -3.7835  | 1.10456  |
| H  | -2.36327 | -5.08884 | -1.00079 |
| H  | -3.85562 | -5.5428  | -0.15682 |
| H  | -3.9283  | -4.46757 | -1.57178 |
| H  | -4.38197 | -2.11392 | 1.36252  |
| H  | -5.12219 | -2.61619 | -0.17826 |
| H  | -5.11169 | -3.72759 | 1.20531  |
| O  | 1.44757  | -1.93942 | 2.00533  |
| C  | 2.86828  | -1.75882 | 2.10493  |
| C  | 3.53458  | -3.08516 | 2.43558  |
| C  | 3.08655  | -0.71556 | 3.1807   |
| H  | 3.23227  | -1.36188 | 1.15017  |
| H  | 3.33002  | -3.85054 | 1.68073  |
| H  | 4.62004  | -2.95523 | 2.50559  |
| H  | 3.16929  | -3.45528 | 3.40002  |
| H  | 2.57309  | 0.19994  | 2.88417  |
| H  | 2.68884  | -1.06622 | 4.13981  |
| H  | 4.15792  | -0.51862 | 3.29819  |
| P  | -1.42651 | 0.95498  | 0.11425  |
| Pd | 0.80023  | 0.66371  | -0.61984 |
| C  | -1.42905 | 2.73754  | 0.69008  |
| C  | -2.75052 | 3.51303  | 0.76949  |
| C  | -0.60188 | 2.93757  | 1.96555  |
| H  | -0.85711 | 3.193    | -0.13654 |
| C  | -2.46267 | 5.00001  | 0.9905   |
| H  | -3.36418 | 3.14986  | 1.60397  |
| H  | -3.34734 | 3.38954  | -0.1406  |
| C  | -0.3267  | 4.42195  | 2.19041  |
| H  | -1.16084 | 2.53752  | 2.82239  |
| H  | 0.32332  | 2.35772  | 1.89966  |

|   |          |          |          |
|---|----------|----------|----------|
| C | -1.61877 | 5.23146  | 2.24132  |
| H | -3.40819 | 5.55275  | 1.05484  |
| H | -1.92811 | 5.39217  | 0.11284  |
| H | 0.24453  | 4.55525  | 3.11721  |
| H | 0.30788  | 4.79894  | 1.37432  |
| H | -1.40278 | 6.30058  | 2.35864  |
| H | -2.19838 | 4.9289   | 3.12619  |
| C | -2.77046 | 0.94223  | -1.17579 |
| C | -2.51224 | 0.03002  | -2.37745 |
| C | -4.1596  | 0.66928  | -0.59148 |
| H | -2.74017 | 1.97898  | -1.54932 |
| C | -3.58686 | 0.23422  | -3.44261 |
| H | -2.52406 | -1.01292 | -2.05281 |
| H | -1.52221 | 0.21841  | -2.80362 |
| C | -5.24518 | 0.83894  | -1.65334 |
| H | -4.17071 | -0.35682 | -0.20904 |
| H | -4.36484 | 1.3266   | 0.26027  |
| C | -4.97655 | -0.03744 | -2.8729  |
| H | -3.38682 | -0.423   | -4.29737 |
| H | -3.54168 | 1.26655  | -3.82075 |
| H | -6.22488 | 0.60406  | -1.2187  |
| H | -5.28526 | 1.8933   | -1.96564 |
| H | -5.74565 | 0.1263   | -3.63761 |
| H | -5.04056 | -1.09505 | -2.57781 |
| C | 2.84683  | 0.56139  | -1.00676 |
| C | 3.48446  | -0.49387 | -1.65864 |
| C | 3.59326  | 1.43169  | -0.21722 |
| C | 4.84462  | -0.71048 | -1.47805 |
| H | 2.92246  | -1.16382 | -2.30184 |
| C | 4.95744  | 1.22308  | -0.02876 |
| H | 3.10644  | 2.24306  | 0.31403  |
| C | 5.58631  | 0.14157  | -0.65461 |
| H | 5.3562   | -1.53264 | -1.96979 |
| H | 5.51221  | 1.89774  | 0.61438  |
| S | 0.99091  | 0.97802  | -2.75248 |
| O | 1.02157  | 2.34658  | -3.2506  |
| O | 1.15935  | -0.11069 | -3.70407 |
| F | 1.25127  | 0.71789  | 1.3007   |
| O | 6.90216  | -0.15609 | -0.52833 |
| C | 7.68431  | 0.67353  | 0.297    |
| H | 7.32375  | 0.66629  | 1.33437  |
| H | 8.69543  | 0.26438  | 0.26498  |
| H | 7.70134  | 1.70835  | -0.06956 |

## Int5

|   |          |          |          |
|---|----------|----------|----------|
| C | 2.40002  | 0.35066  | 1.10038  |
| C | 3.48225  | 0.61911  | 1.94329  |
| C | 3.70347  | -0.13396 | 3.0902   |
| C | 2.84306  | -1.18214 | 3.40387  |
| C | 1.75081  | -1.44555 | 2.58444  |
| C | 1.50383  | -0.67845 | 1.43951  |
| C | 2.30181  | 1.10882  | -0.17927 |
| C | 1.99978  | 2.48993  | -0.20748 |
| C | 2.10389  | 3.19852  | -1.41555 |
| C | 2.49661  | 2.54865  | -2.57034 |
| C | 2.81721  | 1.19013  | -2.56479 |
| C | 2.74653  | 0.48712  | -1.37327 |
| H | 4.15615  | 1.43049  | 1.68284  |
| H | 4.54943  | 0.09243  | 3.73309  |
| H | 3.01377  | -1.78802 | 4.28929  |
| H | 1.08103  | -2.25772 | 2.84397  |
| H | 1.83577  | 4.24579  | -1.45118 |
| H | 2.54261  | 3.10657  | -3.50072 |
| H | 3.11774  | 0.6728   | -3.4693  |
| O | 3.10137  | -0.83452 | -1.32387 |
| C | 4.48757  | -1.06996 | -0.99616 |
| C | 5.31618  | -1.12481 | -2.26668 |
| C | 4.54582  | -2.35296 | -0.19457 |
| H | 4.83153  | -0.23791 | -0.36742 |
| H | 5.25955  | -0.17815 | -2.81214 |
| H | 6.36807  | -1.31829 | -2.0295  |
| H | 4.95344  | -1.92662 | -2.9191  |
| H | 3.983    | -2.24783 | 0.73714  |
| H | 4.12309  | -3.18233 | -0.77233 |
| H | 5.5839   | -2.60015 | 0.05116  |
| O | 1.64856  | 3.05481  | 0.96505  |
| C | 0.70803  | 4.15705  | 0.93338  |
| C | 1.46249  | 5.46408  | 1.09102  |
| C | -0.25941 | 3.90269  | 2.07118  |
| H | 0.16119  | 4.09131  | -0.01533 |
| H | 2.18656  | 5.61527  | 0.28424  |
| H | 0.76416  | 6.30792  | 1.08357  |
| H | 2.00785  | 5.47537  | 2.04168  |
| H | -0.78579 | 2.95822  | 1.90457  |
| H | 0.26961  | 3.84748  | 3.02933  |
| H | -1.0012  | 4.70651  | 2.12415  |
| P | 0.00429  | -0.8937  | 0.40845  |

|    |          |          |          |
|----|----------|----------|----------|
| Pd | -0.30022 | 1.08505  | -0.67162 |
| C  | -1.40167 | -1.26453 | 1.56113  |
| C  | -1.59473 | -2.66365 | 2.15394  |
| C  | -1.44247 | -0.19939 | 2.66428  |
| H  | -2.26151 | -1.07361 | 0.9018   |
| C  | -2.92041 | -2.72378 | 2.91632  |
| H  | -0.77949 | -2.91299 | 2.84547  |
| H  | -1.5912  | -3.42671 | 1.37019  |
| C  | -2.76379 | -0.26347 | 3.4252   |
| H  | -0.60839 | -0.35878 | 3.36048  |
| H  | -1.28845 | 0.79478  | 2.22796  |
| C  | -2.99521 | -1.65662 | 4.00455  |
| H  | -3.05338 | -3.72322 | 3.34876  |
| H  | -3.74519 | -2.57542 | 2.20436  |
| H  | -2.77437 | 0.49052  | 4.2218   |
| H  | -3.58456 | -0.01454 | 2.73745  |
| H  | -3.9646  | -1.70337 | 4.51556  |
| H  | -2.2279  | -1.86267 | 4.76562  |
| C  | 0.31132  | -2.35493 | -0.68668 |
| C  | 0.99104  | -3.56062 | -0.0334  |
| C  | -0.96557 | -2.76225 | -1.42976 |
| H  | 1.01885  | -1.94802 | -1.42275 |
| C  | 1.2934   | -4.62473 | -1.08842 |
| H  | 0.34454  | -3.99291 | 0.74068  |
| H  | 1.91532  | -3.24826 | 0.46121  |
| C  | -0.65695 | -3.83588 | -2.47133 |
| H  | -1.70519 | -3.1535  | -0.71803 |
| H  | -1.42828 | -1.89196 | -1.90385 |
| C  | 0.03258  | -5.04294 | -1.84142 |
| H  | 1.76678  | -5.49503 | -0.61685 |
| H  | 2.02227  | -4.21623 | -1.80405 |
| H  | -1.5819  | -4.14066 | -2.97581 |
| H  | -0.00267 | -3.4058  | -3.2436  |
| H  | 0.27661  | -5.78775 | -2.60884 |
| H  | -0.66181 | -5.52968 | -1.14043 |
| C  | -2.21627 | 0.76218  | -0.96711 |
| C  | -2.64352 | 0.28577  | -2.21029 |
| C  | -3.17749 | 1.12626  | -0.03133 |
| C  | -3.9956  | 0.12527  | -2.48433 |
| H  | -1.91681 | 0.05092  | -2.98311 |
| C  | -4.54245 | 0.97224  | -0.29537 |
| H  | -2.88155 | 1.55365  | 0.92201  |
| C  | -4.95463 | 0.45803  | -1.52393 |
| H  | -4.33342 | -0.24817 | -3.44683 |

|   |          |         |          |
|---|----------|---------|----------|
| H | -5.26265 | 1.26951 | 0.46008  |
| F | -0.61578 | 2.86671 | -1.49302 |
| O | -6.25225 | 0.25436 | -1.88214 |
| C | -7.2402  | 0.61433 | -0.95159 |
| H | -7.20335 | 1.68648 | -0.7141  |
| H | -8.19904 | 0.38364 | -1.41981 |
| H | -7.14785 | 0.04092 | -0.01836 |

## TS6

|   |          |          |          |
|---|----------|----------|----------|
| C | -0.08592 | -2.14964 | 1.80576  |
| C | -0.34425 | -3.22832 | 2.66606  |
| C | -0.05942 | -4.53844 | 2.31557  |
| C | 0.49845  | -4.80046 | 1.06955  |
| C | 0.74776  | -3.74796 | 0.19978  |
| C | 0.47038  | -2.41228 | 0.5392   |
| C | -0.39225 | -0.81276 | 2.37204  |
| C | -1.70449 | -0.49644 | 2.77578  |
| C | -1.95076 | 0.66495  | 3.51319  |
| C | -0.90366 | 1.54353  | 3.78483  |
| C | 0.38691  | 1.28014  | 3.34799  |
| C | 0.63428  | 0.09047  | 2.66108  |
| H | -0.77673 | -3.01035 | 3.63805  |
| H | -0.26862 | -5.34636 | 3.01105  |
| H | 0.73402  | -5.81711 | 0.76789  |
| H | 1.15997  | -3.97589 | -0.77335 |
| H | -2.95038 | 0.90754  | 3.85339  |
| H | -1.10941 | 2.45457  | 4.34016  |
| H | 1.20901  | 1.96805  | 3.51055  |
| O | 1.88678  | -0.18186 | 2.19547  |
| C | 2.75334  | -0.98844 | 3.01777  |
| C | 3.29451  | -0.17789 | 4.1815   |
| C | 3.83481  | -1.47592 | 2.07549  |
| H | 2.16689  | -1.84017 | 3.39041  |
| H | 2.48416  | 0.16247  | 4.83429  |
| H | 3.97747  | -0.79019 | 4.78067  |
| H | 3.83195  | 0.70033  | 3.8101   |
| H | 3.40416  | -2.13576 | 1.3167   |
| H | 4.28919  | -0.62114 | 1.56521  |
| H | 4.60653  | -2.0251  | 2.62405  |
| O | -2.65808 | -1.36826 | 2.37384  |
| C | -4.03765 | -1.05548 | 2.56883  |
| C | -4.48319 | -1.51141 | 3.94832  |
| C | -4.78192 | -1.7497  | 1.446    |



|    |          |          |          |
|----|----------|----------|----------|
| H  | -4.17224 | 0.02847  | 2.45965  |
| H  | -3.88852 | -1.03971 | 4.73687  |
| H  | -5.5365  | -1.26239 | 4.11549  |
| H  | -4.36574 | -2.59693 | 4.03608  |
| H  | -4.45943 | -1.35178 | 0.48001  |
| H  | -4.58161 | -2.8262  | 1.46728  |
| H  | -5.86041 | -1.59146 | 1.54802  |
| P  | 0.67133  | -1.18162 | -0.81392 |
| Pd | 0.8464   | 1.08172  | -0.46235 |
| C  | -0.67276 | -1.71184 | -1.98807 |
| C  | -0.43972 | -2.99016 | -2.79927 |
| C  | -2.02452 | -1.79856 | -1.26799 |
| H  | -0.7217  | -0.87556 | -2.69736 |
| C  | -1.55577 | -3.15954 | -3.83138 |
| H  | -0.44937 | -3.8597  | -2.13088 |
| H  | 0.53368  | -2.97371 | -3.29961 |
| C  | -3.15306 | -1.98412 | -2.28028 |
| H  | -2.0052  | -2.6486  | -0.57261 |
| H  | -2.20187 | -0.90287 | -0.66659 |
| C  | -2.92557 | -3.20998 | -3.16017 |
| H  | -1.3824  | -4.0695  | -4.41942 |
| H  | -1.52391 | -2.31663 | -4.53736 |
| H  | -4.11311 | -2.06601 | -1.75543 |
| H  | -3.21463 | -1.08267 | -2.90528 |
| H  | -3.71709 | -3.29447 | -3.91534 |
| H  | -2.98484 | -4.11607 | -2.53925 |
| C  | 2.33348  | -1.39147 | -1.61925 |
| C  | 3.05376  | -2.73368 | -1.74637 |
| C  | 2.29308  | -0.65705 | -2.96993 |
| H  | 2.92501  | -0.74384 | -0.9514  |
| C  | 4.46948  | -2.50265 | -2.28218 |
| H  | 2.51816  | -3.41416 | -2.42408 |
| H  | 3.12248  | -3.22951 | -0.77299 |
| C  | 3.71042  | -0.43111 | -3.48699 |
| H  | 1.71989  | -1.23728 | -3.70734 |
| H  | 1.78518  | 0.30993  | -2.85388 |
| C  | 4.46478  | -1.751   | -3.60977 |
| H  | 4.98401  | -3.46607 | -2.38732 |
| H  | 5.03264  | -1.9205  | -1.53938 |
| H  | 3.6791   | 0.08479  | -4.45503 |
| H  | 4.22979  | 0.23181  | -2.78188 |
| H  | 5.4931   | -1.57582 | -3.94903 |
| H  | 3.98162  | -2.37423 | -4.37754 |
| B  | 2.86836  | 3.3163   | 1.01079  |

|   |          |         |          |
|---|----------|---------|----------|
| O | 3.09823  | 2.38578 | 1.96767  |
| H | 2.79401  | 1.5268  | 1.60252  |
| O | 3.7746   | 4.33955 | 0.89897  |
| H | 3.46762  | 5.00052 | 0.2679   |
| C | 1.53124  | 3.47243 | 0.14388  |
| C | 0.37251  | 3.98305 | 0.76999  |
| C | 1.54614  | 3.46065 | -1.27251 |
| C | -0.6835  | 4.50067 | 0.03177  |
| H | 0.31937  | 3.98599 | 1.85599  |
| C | 0.48323  | 3.99124 | -2.01291 |
| H | 2.43188  | 3.08852 | -1.78276 |
| C | -0.62201 | 4.52177 | -1.36241 |
| H | -1.56421 | 4.88376 | 0.5392   |
| H | 0.5235   | 3.97662 | -3.09889 |
| H | -1.45303 | 4.92109 | -1.93627 |
| F | 2.8996   | 0.97996 | -0.16692 |
| C | -1.0737  | 1.33383 | -0.85937 |
| C | -1.97916 | 1.5718  | 0.17956  |
| C | -1.54721 | 1.43754 | -2.16611 |
| C | -3.31026 | 1.87687 | -0.07597 |
| H | -1.64102 | 1.53033 | 1.20766  |
| C | -2.88165 | 1.7502  | -2.44416 |
| H | -0.87033 | 1.28968 | -3.0057  |
| C | -3.77422 | 1.95774 | -1.39202 |
| H | -4.0106  | 2.06308 | 0.73448  |
| H | -3.20564 | 1.82524 | -3.47733 |
| O | -5.09633 | 2.24655 | -1.54351 |
| C | -5.59548 | 2.30717 | -2.85482 |
| H | -5.46739 | 1.35126 | -3.38185 |
| H | -6.66081 | 2.52847 | -2.76633 |
| H | -5.1105  | 3.10175 | -3.43892 |
